# Supplementary material for: Development of diagnostic tools and discovery of two novel Indian citrus ringspot virus species: insights into global mandarivirus phylogeography
Source: Front Microbiol. 2025 Feb 14;16:1513291. doi: 10.3389/fmicb.2025.1513291 (PMC11868068; doi:10.3389/fmicb.2025.1513291)
Supplement: Supplementary file 1 [file Table_1.xlsx]

## Sheet: Supplementary_Ecxcel_Sheet_1
Citrus Virus Species	Gene Name	NCBI Accession Number (Nucleotide)	NCBI Accession Number (Protein)	Isolate Name	Genomic Region/Classification)	Country:Region	Citrus Spp./Varities	Protein Sequence	cDNA Sequence
CYVCV	380941	MW380941	QQG64104	P-K-MUK-35	RdRP (Partial)	India: Muktsar,Punjab	Kinnow	MATFSGAFERITDTTVRITLQEEACRQIRAELKNVEHINRYAIQPDAADALEHLGIGSNPFSVALHTHGA_x000B_CKAIENQLLYVVGTLLPKERVTMLFLKKSKLNIMKRCPKFQDIFLNQHIEPRDVSRYCDFNVQSTSTSIP_x000B_TRTAYISDTLHFMDRRDLVRLFLNSPNLETLYATIVLPVEAAYKQPSRYPEIYQINYDFDGFQYIPGGHG_x000B_GGAYHHEFEQLQWLDTGHIHWRGPDCKEIRMTITAQMLESLGANHLFCFKRGKLLTPRVRTFGRDTQ_x000B_	ATGGCCACTTTCAGCGGTGCCTTTGAACGTATTACAGACACCACCGTACGCATTACACTTCAAGAGGAGG_x000B_CATGCCGCCAAATACGCGCTGAACTTAAAAACGTCGAACACATCAACCGTTACGCTATACAGCCTGACGC_x000B_CGCCGACGCACTCGAACACCTAGGCATTGGTTCTAACCCCTTCTCTGTGGCTCTGCACACGCACGGTGCC_x000B_TGCAAAGCGATTGAGAACCAATTACTCTATGTAGTTGGTACCCTACTCCCAAAAGAACGTGTCACCATGC_x000B_TCTTCCTTAAGAAAAGCAAGCTCAACATCATGAAACGCTGCCCTAAATTCCAAGACATCTTCCTGAACCA_x000B_ACATATCGAACCAC…
CYVCV	GD-STJ	KX156739	ASK39462	GD-STJ	RdRP (Partial)	China	shatangju	MATIRGAIERITDTTVRTTLQEEACRQIRAELKNVEHINRYAIQPDAADALEHLGIGSNP_x000B_FSVALHTHGACKAIENQLLYVVGTLLPKERVTMLFLKKSKLNIMKRCPKFQDIFLNQHIE_x000B_PRDVSRYCDFNVQSTSTSIPTRTAYISDTLHFMDRRDLVRLFLNSPNLETLYATIVLPVE_x000B_AAYKQPSRYPEIYQINYDFDGFQYIPGGHGGGAYHHEFEQLQWLDTGHIHWRGPDCKEIR_x000B_MTITAQMLESLGANHLFCFKRGKLLTPRVRTFGRDTQ_x000B_	ATGGCCACTATTAGGGGTGCCATCGAACGCATTACAGACACCACCGTACGCACTACACTT_x000B_CAAGAGGAGGCATGCCGCCAAATACGCGCTGAACTTAAAAACGTCGAACACATCAACCGT_x000B_TACGCTATACAGCCTGACGCCGCCGACGCACTCGAACACCTAGGCATTGGTTCTAACCCC_x000B_TTCTCTGTGGCACTGCACACACACGGTGCCTGCAAAGCGATTGAGAACCAATTACTCTAT_x000B_GTAGTTGGTACCCTACTCCCAAAAGAACGTGTCACCATGCTCTTCCTTAAGAAAAGCAAG_x000B_CTCAACATCATGAAACGCTGCCCTAAATTCCAAGACATCTTCCTGAACCAACATATTGAA_x00…
CYVCV	Kin-Del	OR251443	WVH45229	Kin-Del	RdRP (Partial)	India: IARI, New Delhi	Kinnow mandarin	MATIRGAIERITDTTVRTTLQEEACRQIRAELKNVEHINRYAIQPDAADALEHLGIGSNP_x000B_FSVALHTHGACKAIENQLLYVVGTLLPKERVTMLFLKKSKLNIMKRCPKFQDIFLNQHIE_x000B_PRDVSRYCDFNVQSTSTSIPTRTAYISDTLHFMDRRDLVRLFLNSPNLETLYATIVLPVE_x000B_AAYKQPSRYPEIYQINYDFDGFQYIPGGHGGGAYHHEFEQLQWLDTGHIHWRGPDCKEIR_x000B_MTITAQMLESLGANHLFCFKRGKLLTPRVRTFGRDTQ	ATGGCCACTATTAGGGGTGCCATCGAACGCATTACAGACACCACCGTACGCACTACACTT_x000B_CAAGAGGAGGCATGTCGCCAAATACGCGCTGAACTTAAAAACGTCGAACACATCAACCGT_x000B_TACGCTATACAGCCTGACGCCGCCGACGCACTCGAACACCTAGGCATTGGTTCTAACCCC_x000B_TTCTCTGTGGCACTGCACACGCACGGTGCCTGTAAAGCGATTGAGAACCAATTACTCTAT_x000B_GTAGTTGGTACCTTACTCCCAAAAGAACGTGTCACCATGCTCTTCCTTAAGAAAAGCAAG_x000B_CTCAACATCATGAAACGTTGCCCTAAATTCCAAGACATCTTCCTGAACCAACATATCGAA_x00…
CYVCV	JS-RN1	MK415925	QIN54960	JS-RN1	RdRP (Partial)	China: Yunnan	Nichinan 1 Wase	MATIRGAIERITDTTVRTTLQEEACRQIRAELKNVEHINRYAIQPDAADALEHLGIGSNP_x000B_FSVALHTHGACKAIENQLLYVVGTLLPKERVTMLFLKKSKLNIMKRCPKFQDIFLNQHIE_x000B_PRDVSRYCDFNVQSTSTSIPTRTAYISDTLHFMDRRDLVRLFLNSPNLETLYATIVLPVE_x000B_AAYKQPSRYPEIYQINYDFDGFQYIPGGHGGGAYHHEFEQLQWLDTGHIHWRGPDCKEIR_x000B_MTITAQMLESLGANHLFCFKRGKLLTPRVRTFGRDTQ	ATGGCCACTATTAGGGGTGCCATCGAACGCATTACAGACACCACCGTACGCACTACACTT_x000B_CAAGAGGAGGCATGCCGCCAAATACGCGCTGAACTTAAAAACGTCGAACACATCAACCGT_x000B_TACGCTATACAGCCTGACGCCGCCGACGCACTCGAACACCTAGGCATTGGTTCTAACCCC_x000B_TTCTCTGTGGCACTGCACACACACGGTGCCTGCAAAGCGATTGAGAACCAATTACTCTAT_x000B_GTAGTTGGTACCTTACTCCCAAAAGAACGTGTCACCATGCTCTTCCTTAAGAAAAGCAAG_x000B_CTCAACATCATGAAACGCTGCCCTAAATTCCAAGACATCTTCCTGAACCAACATATTGAA_x00…
CYVCV	YN-KPJ	MK415923	QIN54948	YN-KPJ	RdRP (Partial)	China: Yunnan	Satsuma	MATIRGAIERITDTTVRTTLQEEACRQIRAELKNVEHINRYAIQPDAADALEHLGIGSNP_x000B_FSVALHTHGACKAIENQLLYVVGTLLPKERVTMLFLKKSKLNIMKRCPKFQDIFLNQHIE_x000B_PRDVSRYCDFNVQSTSTSIPTRTAYISDTLHFMDRRDLVRLFLNSPNLETLYATIVLPVE_x000B_AAYKQPSRYPEIYQINYDFDGFQYIPGGHGGGAYHHEFEQLQWLDTGHIHWRGPDCKEIR_x000B_MTITAQMLESLGANHLFCFKRGKLLTPRVRTFGRDTQ	ATGGCCACTATTAGGGGTGCCATCGAACGCATTACAGACACCACCGTACGCACTACACTT_x000B_CAAGAGGAGGCATGCCGCCAAATACGCGCTGAACTTAAAAACGTCGAACACATCAACCGT_x000B_TACGCTATACAGCCTGACGCCGCCGACGCACTCGAACACCTAGGCATTGGTTCTAACCCC_x000B_TTCTCTGTGGCACTGCACACACACGGTGCCTGCAAAGCGATTGAGAACCAATTACTCTAT_x000B_GTAGTTGGTACCTTACTCCCAAAAGAACGTGTCACCATGCTCTTCCTTAAGAAAAGCAAG_x000B_CTCAACATCATGAAACGCTGCCCTAAATTCCAAGACATCTTCCTGAACCAACATATTGAA_x00…
CYVCV	JX-NH	KX156747	ASK39510	JX-NH	RdRP (Partial)	China	sweet orange	MATIRGAIERITDTTVRTTLQEEACRQIRAELKNVEHINRYAIQPDAADALEHLGIGSNP_x000B_FSVALHTHGACKAIENQLLYVVGTLLPKERVTMLFLKKSKLNIMKRCPKFQDIFLNQHIE_x000B_PRDVSRYCDFNVQSTSTSIPTRTAYISDTLHFMDRRDLVRLFLNSPNLETLYATIVLPVE_x000B_AAYKQPSRYPEIYQINYDFDGFQYIPGGHGGGAYHHEFEQLQWLDTGHIHWRGPDCKEIR_x000B_MTITAQMLESLGANHLFCFKRGKLLTPRVRTFGRDTQ	ATGGCCACTATTAGGGGTGCCATCGAACGCATTACAGACACCACCGTACGCACTACACTT_x000B_CAAGAGGAGGCATGCCGCCAAATACGCGCTGAACTTAAAAACGTCGAACACATCAACCGT_x000B_TACGCTATACAGCCTGACGCCGCCGACGCACTCGAACACCTAGGCATTGGTTCTAACCCC_x000B_TTCTCTGTGGCACTGCACACACACGGTGCCTGCAAAGCGATTGAGAACCAATTACTCTAT_x000B_GTAGTTGGTACCTTACTCCCAAAAGAACGTGTCACCATGCTCTTCCTTAAGAAAAGCAAG_x000B_CTCAACATCATGAAACGCTGCCCTAAATTCCAAGACATCTTCCTGAACCAACATATTGAA_x00…
CYVCV	HP-MRJ	MK415926	QIN54966	HP-MRJ	RdRP (Partial)	China: Yunnan	Asumi	MATIRGAIERITDTTVRTTLQEEACRQIRAELKNVEHINRYAIQPDAADALEHLGIGSNP_x000B_FSVALHTHGACKAIENQLLYVVGTLLPKERVTMLFLKKSKLNIMKRCPKFQDIFLNQHIE_x000B_PRDVSRYCDFNVQSTSTSIPTRTAYISDTLHFMDRRDLVRLFLNSPNLETLYATIVLPVE_x000B_AAYKQPSRYPEIYQINYDFDGFQYIPGGHGGGAYHHEFEQLQWLDTGHIHWRGPDCKEIR_x000B_MTITAQMLESLGANHLFCFKRGKLLTPRVRTFGRDTQ	ATGGCCACTATTAGGGGTGCCATCGAACGCATTACAGACACCACCGTACGCACTACACTT_x000B_CAAGAGGAGGCATGCCGCCAAATACGCGCTGAACTTAAAAACGTCGAACACATCAACCGT_x000B_TACGCTATACAGCCTGACGCCGCCGACGCACTCGAACACCTAGGCATTGGTTCTAACCCC_x000B_TTCTCTGTGGCACTGCACACACACGGTGCCTGCAAAGCGATTGAGAACCAATTACTCTAT_x000B_GTAGTTGGTACCTTACTCCCAAAAGAACGTGTCACCATGCTCTTCCTTAAGAAAAGCAAG_x000B_CTCAACATCATGAAACGCTGCCCTAAATTCCAAGACATCTTCCTGAACCAACATATTGAA_x00…
CYVCV	GJ2	OL441344	UYW66713	GJ2	RdRP (Partial)	South Korea	persian lime	MATIRGAIERITDTTVRTTLQEEACRQIRAELKNVEHINRYAIQPDAADALEHLGIGSNP_x000B_FSVALHTHGACKAIENQLLYVVGTLLPKERVTMLFLKKSKLNIMKRCPKFQDIFLNQHIE_x000B_PRDVSRYCDFNVQSTSTSIPTRTAYISDTLHFMDRRDLVRLFLNSPNLETLYATIVLPVE_x000B_AAYKQPSRYPEIYQINYDFDGFQYIPGGHGGGAYHHEFEQLQWLDTGHIHWRGPDCKEIR_x000B_MTITAQMLESLGANHLFCFKRGKLLTPRVRTFGRDTQ	ATGGCCACTATTAGGGGTGCCATCGAACGCATTACAGACACCACCGTACGCACTACACTT_x000B_CAAGAGGAGGCATGCCGCCAAATACGCGCTGAACTTAAAAACGTCGAACACATCAACCGT_x000B_TACGCTATACAGCCTGACGCCGCCGACGCACTCGAACACCTAGGCATTGGTTCTAACCCC_x000B_TTCTCTGTGGCACTGCACACGCACGGTGCCTGCAAAGCGATTGAGAACCAATTACTCTAT_x000B_GTAGTTGGTACCTTACTCCCAAAAGAACGTGTCACCATGCTCTTCCTTAAGAAAAGCAAG_x000B_CTCAACATCATGAAACGCTGCCCTAAATTCCAAGACATCTTCCTGAACCAACATATTGAA_x00…
CYVCV	MW380944	MW380944	QQG64107	H-K-SIR-47	RdRP (Partial)	India: Sirsa,Haryana	Citrus sp. cultivar Kinnow	MAIIRGAIERITDTTVRTTLQEEACRQIRAELKNVEHINRYAIQPDAADALEHLGIGSNP_x000B_FSVALHTHGACKAIENQLLYVVGTLLPKERVTMLFLKKSKLNIMKRCPKFQDIFLNQHIE_x000B_PRDVSRYCDFNVQSTSTSIPTRTAYISDTLHFMDRRDLVRLFINSPNLETLYATIVLPVE_x000B_AAYKQPSRYPEIYQINYDFDGFQYIPGGHGGGAYHHEFEQLQWLDTGHIHWRGPDCKEIR_x000B_MTITAQMLESLGANHLFCFKRGKLLTPRVRTFGRDTQ	ATGGCCATTATTAGGGGTGCCATCGAACGCATTACAGACACCACCGTACGCACTACACTT_x000B_CAAGAGGAGGCATGCCGCCAAATACGCGCTGAACTTAAAAACGTCGAACACATCAACCGT_x000B_TACGCTATACAGCCTGACGCCGCCGACGCACTCGAACACCTAGGCATTGGTTCTAACCCC_x000B_TTCTCTGTGGCACTGCACACGCACGGTGCCTGCAAAGCGATTGAGAACCAATTACTCTAT_x000B_GTAGTTGGTACCTTACTCCCAAAAGAACGTGTCACCATGCTCTTCCTTAAGAAAAGCAAG_x000B_CTCAACATCATGAAACGTTGCCCTAAATTCCAAGACATCTTCCTGAACCAACATATCGAA_x00…
CYVCV	IS	KT345342	ANQ46533		RdRP (Partial)	Pakistan	lemon Cascade Eureka	MATIRGAIERITDTTVRTTLQEEACRQIRAELKNVEHINRYAIQPDAADALEHLGIGSNP_x000B_FSVALHTHGACKAIENQLLYVVGTLLPKERVTMLFLKKSKLNIMKRCPKFQDIFLNQHIE_x000B_PRDVSRYCDFNVQSTSTSIPTRTAYISDTLHFMDRRDLVRLFLNSPNLETLYATIVLPVE_x000B_AAYKQPSRYPEIYQINYDFDGFQYIPGGHGGGAYHHEFEQLQWLDTGHIHWRGPDCKEIR_x000B_MTITAQMLESLGANHLFCFKRGKLLTPRVRTFGRDTQ_x000B_	ATGGCCACTATTAGGGGTGCCATCGAACGCATTACAGACACCACCGTACGCACTACACTT_x000B_CAAGAGGAGGCTTGCCGCCAAATACGCGCCGAACTTAAAAACGTCGAACACATCAACCGT_x000B_TACGCTATACAGCCTGACGCCGCCGACGCACTCGAACACCTAGGCATTGGCTCTAACCCC_x000B_TTCTCTGTGGCACTGCACACGCACGGTGCCTGCAAAGCGATTGAGAACCAATTACTCTAT_x000B_GTAGTTGGTACCTTACTCCCAAAAGAACGTGTCACCATGCTCTTCCTTAAGAAAAGCAAG_x000B_CTCAACATCATGAAACGCTGCCCTAAATTCCAAGACATCTTCCTGAACCAACATATCGAA_x00…
CYVCV	Y1	JX040635	AFO65010		RdRP (Partial)	Turkey	lemon	MATIRGAIERITDTTVRTTLQEEACRQIRAELKNVEHINRYAVQPDAADALEHLGIGSNP_x000B_FSVALHTHGACKAIENQLLYVVGTLLPKERVTMPFLKKSKLNIMKRCPKFQDIFLNQHIE_x000B_PRDVSRYCDFNVQSTSTSIPTRTAYISDTLHFMDRRDLVRLFLNSPNLETLYATIVLPVE_x000B_AAYKQPSRYPEIYQINYDFDGFQYIPGGHGGGAYHHEFEQLQWLDTGHIHWRGPDCKEIR_x000B_MTITAQMLESLGANHLFCFKRGKLLTPRVRTFGRDTQ	ATGGCCACTATTAGGGGTGCCATCGAACGCATTACAGACACCACCGTACGCACTACACTT_x000B_CAAGAGGAGGCATGCCGCCAAATACGCGCTGAACTTAAAAACGTCGAGCACATCAACCGT_x000B_TATGCTGTACAGCCTGACGCCGCCGACGCACTCGAACACCTAGGCATTGGTTCTAACCCC_x000B_TTCTCTGTGGCACTGCACACGCACGGTGCCTGCAAAGCGATTGAGAACCAATTACTCTAT_x000B_GTAGTTGGTACCTTACTCCCAAAAGAGCGTGTCACCATGCCCTTCCTTAAGAAAAGCAAG_x000B_CTCAACATCATGAAACGCTGCCCCAAATTCCAAGACATCTTCCTGAACCAACACATCGAA_x00…
CYVCV	AY221	MW429491	WBG00087		RdRP (Partial)	China: Anyue, Sichuan	Eureka lemon	MATIRGAIERITDTTVRTTLQEEACRQIRAELKNVEHINRYAIQPDAADALEHLGIGSNPFSVALHTHGACKAIENQLLYVVGTLLPKERVTMLFLKKSKLNIMKRCPKFQDIFLNQHIEPRDVSRYCDFNVQSTSTSIPTRTAYISDTLHFMDRRDLVRLFLNSPNLETLYATIVLPVEAAYKQPSRYPEIYQINYDFDGFQYIPGGHGGGAYHHEFEQLQWLDTGHIHWRGPDCKEIRMTITAQMLESLGANHLFCFKRGKLHTPRVRTFGRDTQ_x000B__x000B_	ATGGCCACTATTAGGGGTGCCATCGAACGCATTACAGACACCACCGTACGCACTACACTT_x000B_CAAGAGGAGGCATGCCGCCAAATACGCGCTGAACTTAAAAACGTCGAACACATCAACCGT_x000B_TACGCTATACAGCCTGACGCCGCCGACGCACTCGAACACCTAGGCATTGGTTCTAACCCC_x000B_TTCTCTGTGGCACTGCACACGCACGGTGCCTGCAAAGCTATTGAGAACCAATTACTCTAT_x000B_GTAGTTGGTACCTTACTCCCAAAAGAGCGTGTCACCATGCTCTTCCTTAAGAAAAGCAAG_x000B_CTCAACATCATGAAACGCTGCCCTAAATTCCAAGACATCTTCCTGAACCAACATATTGAA_x00…
CYVCV	GJ4	MT883230	UDP03908		RdRP (Partial)	South Korea	Citrus limon	MATIRGAIERITDTTVRTTLQEEACRQIRAELKNVEHINRYAIQPDAADALEHLGIGSNPFSVALHTHGACKAIENQLLYVVGTLLPKERVTMLFLKKSKLNIMKRCPKFQDIFLNQHIEPRDVSRYCDFNVQSTSTSIPTRTAYISDTLHFMDRRDLVRLFLNSPNLETLYATIVLPVEAAYKQPSRYPEIYQINYDFDGFQYIPGGHGGGAYHHEFEQLQWLDTGHIHWRGPDCKEIRMTITAQMLESLGANHLFCFKRGKLLTPRVRTFGRDTQ_x000B__x000B_	ATGGCCACTATTAGGGGTGCCATCGAACGCATTACAGACACCACCGTACGCACTACACTTCAAGAGGAGGCATGCCGCCAAATACGCGCTGAACTTAAAAACGTCGAACACATCAACCGTTACGCTATACAGCCTGACGCCGCCGACGCACTCGAACACCTAGGCATTGGTTCTAACCCCTTCTCTGTGGCACTGCACACGCACGGTGCCTGCAAAGCGATTGAGAACCAATTACTCTATGTAGTTGGTACCTTACTCCCAAAAGAACGTGTCACCATGCTCTTCCTTAAGAAAAGCAAGCTCAACATCATGAAACGCTGCCCTAAATTCCAAGACATCTTCCTGAACCAACATATTGAACCACGCGACGTTTCTAGGTACTGCGACTTTAACGTCCAA…
CYVCV	BJ-WG	MK415927	QIN54972		RdRP (Partial)	China: Yunnan	Or	MATIRGAIERITDTTVRTTLQEEACRQIRAELKNVEHINRYAIQPDAADALEHLGIGSNPFSVALHTHGACKAIENQLLYVVGTLLPKERVTMLFLKKSKLNIMKRCPKFQDIFLNQHIEPRDVSRYCDFNVQSTSTSIPTRTAYISDTLHFMDRRDLVRLFLNSPNLETLYATIVLPVEAAYKQPSRYPEIYQINYDFDGFQYIPGGHGGGAYHHEFEQLQWLDTGHIHWRGPDCKEIRMTITAQMLESLGANHLFCFKRGKLHTPRVRTFGRDTQ_x000B__x000B_	ATGGCCACTATTAGGGGTGCCATCGAACGCATTACAGACACCACCGTACGCACTACACTT CAAGAGGAGGCATGCCGCCAAATACGCGCTGAACTTAAAAACGTCGAACACATCAACCGT TACGCTATACAGCCTGACGCCGCCGACGCACTCGAACACCTAGGCATTGGTTCTAACCCC TTCTCTGTGGCACTGCACACGCACGGTGCCTGCAAAGCGATTGAGAACCAATTACTCTAT GTAGTTGGTACCTTACTCCCAAAAGAACGTGTCACCATGCTCTTCCTTAAGAAAAGCAAG CTCAACATCATGAAACGCTGCCCTAAATTCCAAGACATCTTCCTGAACCAACATATTGAA CCACGCGACGTTTCTAGGTACTGCGACTTTAAC…
CYVCV	SIR-45	MK415927	QQG64108	H-K-SIR-45, MW380945	RdRP (Partial)	India: Sirsa,Haryana	Kinnow	MAIIRGAIERITDTTVRTTLQEEACRQIRAELKNVEHINRYAIQPDAADALEHLGIGSNPFSVALHTHGA_x000B_CKAIENQLLYVVGTLLPKERVTMLFLKKSKLNIMKRCPKFQDIFLNQHIEPRDVSRYCDFNVQSTSTSIP_x000B_TRTAYISDTLHFMDRRDLVRLFINSPNLETLYATIVLPVEAAYKQPSRYPEIYQINYDFDGFQYIPGGHG_x000B_GGAYHHEFEQLQWLDTGHIHWRGPDCKEIRMTITAQMLESLGANHLFCFKRGKLLTPRVRTFGRDTQV	ATGGCCATTATTAGGGGTGCCATCGAACGCATTACAGACACCACCGTACGCACTACACTT CAAGAGGAGGCATGCCGCCAAATACGCGCTGAACTTAAAAACGTCGAACACATCAACCGT TACGCTATACAGCCTGACGCCGCCGACGCACTCGAACACCTAGGCATTGGTTCTAACCCC TTCTCTGTGGCACTGCACACGCACGGTGCCTGCAAAGCGATTGAGAACCAATTACTCTAT GTAGTTGGTACCTTACTCCCAAAAGAACGTGTCACCATGCTCTTCCTTAAGAAAAGCAAG CTCAACATCATGAAACGTTGCCCTAAATTCCAAGACATCTTCCTGAACCAACATATCGAA CCACGTGACGTTTCTAGGTACTGCGACTTTAAC…
CYVCV	BJ-HMR	MK415924	QIN54954		RdRP (Partial)	China: Yunnan	C. reticulata	MATIRGAIERITDTTVRTTLQEEACRQIRAELKNVEHINRYAIQPDAADALEHLGIGSNPFSVALHTHGACKAIENQLLYVVGTLLPKERVTMLFLKKSKLNIMKRCPKFQDIFLNQHIEPRDVSRYCDFNVQSTSTSIPTRTAYISDTLHFMDRRDLVRLFLNSPNLETLYATIVLPVEAAYKQPSRYPEIYQINYDFDGFQYIPGGHGGGAYHHEFEQLQWLDTGHIHWRGPDCKEIRMTITAQMLESLGANHLFCFKRGKLLTPRVRTFGRDTQ_x000B__x000B_	ATGGCCACTATTAGGGGTGCCATCGAACGCATTACAGACACCACCGTACGCACTACACTT CAAGAGGAGGCATGCCGCCAAATACGCGCTGAACTTAAAAACGTCGAACACATCAACCGT TACGCTATACAGCCTGACGCCGCCGACGCACTCGAACACCTAGGCATTGGTTCTAACCCC TTCTCTGTGGCACTGCATACGCACGGTGCCTGCAAAGCGATTGAGAACCAATTACTCTAT GTAGTTGGTACCTTACTCCCAAAAGAACGTGTCACCATGCTCTTCCTTAAGAAAAGCAAG CTCAACATCATGAAACGCTGCCCTAAATTCCAAGACATCTTCCTGAACCAACATATTGAA CCACGCGACGTTTCTAGGTACTGCGACTTTAAT…
CYVCV	CA3	OR670061	WVD52760		RdRP (Partial)	USA	Citrus hystrix = Kaffir lime	MATIRGAIERITDTTVRTTLQEEACRQIRAELKNIEHINRYAIQPDAADALEHLGIGSNPFSVALHTHGACKAIENQLLYVVGTLLPKERVTMLFLKKSKLNIMKRCPKFQDIFLNQHIEPRDVSRYCDFNVQSTSTSIPTRTAYISDTLHFMDRRDLVRLFLNSPNLETLYATIILPVEAAYRQPSRYPEIYQINYDFDGFQYIPGGHGGGAYHHEFEQLQWLDTGHIHWRGPDCKEIRMTITAQMLESLGANHLFCFKRGKLLTPRVRTFGRDTQ_x000B__x000B_	ATGGCCACTATTAGGGGTGCCATCGAACGCATTACAGACACCACCGTACGCACCACACTT CAAGAGGAGGCATGCCGCCAAATACGCGCTGAACTTAAAAACATCGAACACATCAACCGT TACGCTATACAGCCTGACGCCGCCGACGCACTCGAACACCTAGGTATTGGCTCTAACCCC TTCTCTGTGGCACTGCACACGCACGGTGCCTGCAAAGCGATTGAGAACCAATTACTCTAT GTAGTTGGTACCTTACTCCCAAAAGAACGTGTCACCATGCTCTTCCTTAAGAAAAGCAAG CTCAACATCATGAAACGCTGCCCTAAATTTCAAGACATCTTCCTGAACCAACACATAGAA CCACGTGACGTTTCTAGGTACTGCGACTTTAAC…
CYVCV	AY204	MG878869	AWJ64282		RdRP (Partial)	China: Sichuan	Citrus limon	MATIRGAIERITDTTVRTTLQEEACRQIRAELKTVEHINRYAIQPDAADAPEHLGIGSNPFSVALHTHGACKAIENQLLYVVGTLLPKERVTMLFLKKSKLNIIKRCPKFQDIFLNQHIEPRDVSRYCDFNVQSTSTSIPTRTAYISDTLHFMDRRDLVRLFLNSPNLETLYATIVLPVEAAYKQPSRYPEIYQINYDFDGFQYIPGGHGGGAYHHEFEQLQWLDTGHIHWRGPDCKEIRMTITAQMLESLGANHLFCFKRGKLLTPRVRTFGRDTQ_x000B__x000B_	ATGGCCACTATTAGGGGTGCCATCGAACGCATTACAGACACCACCGTACGCACTACACTC CAAGAGGAGGCATGCCGCCAAATACGCGCTGAACTTAAAACCGTCGAACACATCAACCGT TACGCTATACAGCCTGACGCCGCCGACGCACCCGAACACCTAGGCATTGGTTCTAACCCC TTCTCTGTGGCACTGCACACGCACGGTGCCTGCAAAGCGATTGAGAACCAATTACTCTAT GTAGTTGGTACCTTACTCCCAAAAGAACGTGTCACCATGCTCTTCCTTAAGAAAAGCAAG CTCAACATCATAAAACGCTGCCCTAAATTCCAAGACATCTTCCTGAACCAACATATTGAG CCACGCGACGTTTCTAGGTACTGCGACTTTAAC…
CYVCV	SIR-44	MW380942	QQG64105	H-K-SIR-44; MW380942	RdRP (Partial)	India: Sirsa,Haryana	Kinnow	MATIRGAIERITDTTVRTTLQEEACRQIRAELKNVEHINRYAIQPDAADALEHLGIGSNPFSVALHTHGACKAIENQLLYVVGTLLPKERVTMLFLKKSKLNIMKRCPKFQDIFLNQHIEPRDVSRYCDFNVQSTSTSIPTRTAYISDTLHFMDRRDLVRLFINSPNLETLYATIVLPVEAAYKQPSRYPEIYQINYDFDGFQYIPGGHGGGAYHHEFEQLQWLDTGHIHWRGPDCKGIRMTITAQMLESLGANHLFCFKRGKLLTPRVRTFGRDT_x000B__x000B_	ATGGCCACTATTAGGGGTGCCATCGAACGCATTACAGACACCACCGTACGCACTACACTT CAAGAGGAGGCATGCCGCCAAATACGCGCTGAACTTAAAAACGTCGAACACATCAACCGT TACGCTATACAGCCTGATGCCGCCGACGCACTCGAACACCTAGGCATTGGTTCTAACCCC TTCTCTGTGGCACTGCACACGCACGGTGCCTGCAAAGCGATTGAGAACCAACTACTCTAT GTAGTTGGTACCTTACTCCCAAAAGAACGTGTCACCATGCTCTTCCTCAAGAAAAGCAAG CTCAACATCATGAAACGTTGCCCTAAATTCCAAGACATCTTCCTGAACCAACATATCGAA CCGCGTGACGTTTCTAGGTACTGCGACTTTAAC…
CYVCV	CA6	OQ418493	QQG64105		RdRP (Partial)	USA: California	lemon	MATIRGAIERITDTTVRTTLQEEACRQIRAELKNIEHINRYAIQPDAADALEHLGIGSNPFSVALHTHGACKAIENQLLYVVGTLLPKERVTMLFLKKSKLNIMKRCPKFQDIFLNQHIEPRDVSRYCDFNVQSTSTSIPTRTAYISDTLHFMDRRDLVRLFLNSPNLETLYATIILPVEAAYRQPSRYPEIYQINYDFDGFQYIPGGHGGGAYHHEFEQLQWLDTGHIHWRGPDCKEIRMTITAQMLESLGANHLFCFKRGKLLTPRVRTFGRDTQ_x000B__x000B_	ATGGCCACTATTAGGGGTGCCATCGAACGCATTACAGACACCACCGTACGCACCACACTT CAAGAGGAGGCATGCCGCCAAATACGCGCTGAACTTAAAAACATCGAACACATCAACCGT TACGCTATACAGCCTGACGCTGCCGACGCACTCGAACACCTAGGTATTGGCTCTAACCCC TTCTCTGTGGCACTGCACACGCACGGTGCCTGCAAAGCGATTGAGAACCAATTACTCTAT GTAGTTGGTACCTTACTCCCAAAAGAACGTGTCACCATGCTCTTCCTTAAGAAAAGCAAG CTCAACATCATGAAACGCTGCCCTAAATTTCAAGACATCTTCCTGAACCAACACATAGAA CCACGTGACGTTTCTAGGTACTGCGACTTTAAC…
CYVCV	MUK-33	MW380943	QQG64106	P-K-MUK-33; MW380943	RdRP (Partial)	India: Muktsar,Punjab	Kinnow	RPIRAELSNVEHFNRYAIQPDAADALEHLGIGSNPFSVALHTHGACKAIENQLLYVVGTLLPKERVTM_x000B_LFLKKSKLNIMKRCPKFQDIFLNQHIEPRDVSRYCDFNVQSTSTSIPTRTAYISDTLHFMDRRDLVRLFL_x000B_NSPNLETLYATIVLPVEAAYKQPSRYPEIYQINYDFDGFQYIPGGHGGGAYHHEFEQLQWLDTGHIHWRG_x000B_PDCKEIRMTITAQMLE	CCGCCCAATACGCGCTGAACTTTCAAACGTCGAACACTTCAACCGTTATGCTATACAGCCTGACGCCGCTGACGCACTCGAACACCTAGGCATTGGTTCAAACCCCTTCTCTGTGGCACTGCACACGCACGGTGCCTGCAAAGCGATTGAGAACCAATTACTCTATGTAGTTGGTACCCTACTCCCAAAAGAACGTGTCACCATGCTCTTCCTTAAGAAAAGCAAGCTCAACATCATGAAACGCTGCCCTAAATTCCAAGACATCTTCCTGAACCAACATATCGAACCACGTGACGTTTCTAGGTACTGCGACTTTAACGTCCAATCCACCTCCACCAGCATACCCACACGAACAGCTTACATCAGTGACACACTCCACTTTATGGACCGTAGAGATCT…
CYVCV	MW380946	MW380946	QQG64109	P-K-ABH-19	RdRP (Partial)	India: Abohar,Punjab	Kinnow	APRPIRAELSNVEHFNRYAIQPDAADALEHLGIGSNPFSVALHTHGACKAIENQLLYVVGTLLPKERVTM_x000B_LFLKKSKLNIMKRCPKFQDIFLNQHIEPRDVSRYCDFNVQSTSTSIPTRTAYISDTLHFMDRRDLVRLFL_x000B_NSPNLETLYATIVLPVEAAYKQPSRYPEIYQINYDFDGFQYIPGGHGGGAYHHEFEQLQWLDTGHIHWRG_x000B_PDCKEIRMTITAQMLESLGANHLFCFK	GGCACCCCGCCCAATACGCGCTGAACTTTCAAACGTCGAACACTTCAACCGTTATGCTATACAGCCTGAC_x000B_GCCGCTGACGCACTTGAACACCTAGGCATTGGTTCGAACCCCTTTTCTGTGGCACTGCACACGCACGGTG_x000B_CCTGCAAAGCGATTGAGAACCAATTACTCTATGTAGTTGGTACCCTACTCCCAAAAGAACGTGTCACCAT_x000B_GCTCTTCCTTAAGAAAAGCAAGCTCAACATCATGAAACGCTGCCCTAAATTCCAAGACATCTTCCTGAAC_x000B_CAACATATCGAACCACGTGACGTTTCTAGGTACTGCGACTTTAACGTCCAATCCACCTCCACCAGCATAC_x000B_CCACACGAACAGCT…
CYVCV	ZJ_2	KY933795	AVQ67745		RdRP (Partial)	China	Citrus medica	MATIRGAIERITDTTVRTTLQEEACRQIRAELKNVEHINRYAIQPDAADALEHLGIGSNPFSVALHTHGACKAIENQLLYVVGTLLPKERVTMLFLKKSKLNIMKRCPKFQDIFLNQHIEPRDVSRYCDFNVQSTSTSIPTRTAYISDTLHFMDRRDLVRLFLNSPNLETLYATIVLPVEAAYKQPSRYPEIYQINYDFDGFQYIPGGHGGGAYHHEFEQLQWLDTGHIHWRGPDCKEIRMTVTAQMLESLGANHLFCFKRGKLLTPRVRTFGRDTQ_x000B__x000B_	ATGGCCACTATTAGGGGTGCCATCGAACGCATTACAGACACCACAGTACGCACTACACTT CAAGAGGAGGCATGCCGCCAAATACGCGCTGAACTTAAAAACGTCGAACACATCAACCGT TACGCTATACAGCCTGACGCCGCCGACGCACTCGAACACCTAGGCATTGGTTCTAACCCC TTCTCTGTGGCACTGCACACGCACGGTGCCTGCAAAGCGATTGAGAACCAATTACTCTAT GTAGTTGGTACCTTACTCCCAAAAGAACGTGTCACCATGCTCTTCCTTAAGAAAAGCAAG CTCAACATCATGAAACGCTGCCCTAAATTCCAAGACATCTTCCTGAACCAACATATTGAA CCACGCGACGTTTCTAGGTACTGCGACTTTAAC…
CYVCV	ZJ_3	KY933796	AVQ67751		RdRP (Partial)	China	Citrus reticulata x Citrus sinensis	MATIRGAIERITDTTVRTTLQEEACRQIRAELKNVEHINRYAIQPDAADALEHLGIGSNPFSVALHTHGACKAIENQLLYVVGTLLPKERVTMLFLKKSKLNIMKRCPKFQDIFLNQHIEPRDVSRYCDFNVQSTSTSIPTRTAYISDTLHFMDRRDLIRLFLNSPNLETLYATIVLPVEAAYKQPSRYPEIYQINYDFDGFQYIPGGHGGGAYHHEFEQLQWLDTGHIHWRGPDCKEIRMTVTAQMLESLGANHLFCFKRGKLLTPRVRTFGRDTQ_x000B__x000B_	ATGGCCACTATTAGGGGTGCCATCGAACGCATTACAGACACCACAGTGCGCACTACACTT CAAGAGGAGGCATGCCGCCAAATACGCGCTGAACTTAAAAACGTCGAACACATCAACCGT TACGCTATACAGCCTGACGCCGCCGACGCACTCGAACACCTAGGCATTGGTTCTAACCCC TTCTCTGTGGCACTGCACACGCACGGTGCCTGCAAAGCGATTGAGAACCAATTACTCTAT GTAGTTGGTACCTTACTCCCAAAAGAACGTGTCACCATGCTCTTCCTTAAGAAAAGCAAG CTCAACATCATGAAACGCTGCCCTAAATTCCAAGACATCTTCCTGAACCAACATATTGAA CCACGCGACGTTTCTAGGTACTGCGACTTTAAC…
CYVCV	CA18	OQ418503	WRN92110		RdRP (Partial)	USA: California	lemon	MATIRGAIERITDTTVRTTLQEEACRQIRAELKNVEHINRYAIQPDAADALEHLGIGSNPFSVALHTHGACKAIENQLLYVVGTLLPKERVTMLFLKKSKLNIMKRCPKFQDIFLNQHIEPRDVSRYCDFNVQSTSTSIPTRTAYISDTLHFMDRRDLVRLFLNSPNLETLYATIVLPVEAAYKQPSRYPEIYQINYDFDGFQYIPGGHGGGAYHHEFEQLQWLDTGHIHWRGPDCKEIRMTITAQMLESLGANHLFCFKRGKLLTPRVRTFGRDTQ_x000B__x000B_	ATGGCCACTATTAGGGGTGCCATCGAACGCATTACAGACACCACCGTACGCACTACACTT CAAGAGGAGGCATGCCGCCAAATACGCGCTGAACTTAAAAACGTCGAACACATCAACCGT TACGCTATACAGCCTGACGCCGCCGACGCACTCGAACACCTAGGCATTGGTTCTAACCCC TTCTCTGTGGCACTGCACACGCACGGTGCCTGCAAAGCGATCGAGAACCAATTACTCTAT GTAGTTGGTACCCTACTCCCAAAAGAACGTGTCACCATGCTCTTCCTTAAGAAAAGCAAA CTCAACATCATGAAACGCTGCCCTAAATTCCAAGACATCTTCCTGAACCAACATATCGAG CCACGTGACGTTTCTAGGTACTGCGACTTTAAC…
CYVCV	Y2	MT951237	WRN92110		RdRP (Partial)	Turkey: Adana	Citrus aurantium = Bitter orange	MATIRGAIERITDTTVRTTLQEEACRQIRAELKNVEHINRYAIQPDAADALEHLGIGSNPFSVALHTHGACKAIENQLLYVVGTLLPKERVTMLFLKKSKLNIMKRCPKFQDIFLNQHIEPRDVSRYCDFNVQSTSTSIPTRTAYISDTLHFMDRRDLVRLFLNSPNLETLYATIVLPVEAAYKQPSRYPEIYQINYDFDGFQYIPGGHGGGAYHHEFEQLQWLDTGHIHWRGPDCKEIRMTITAQMLESLGANHLFCFKRGKLLTPRVRTFGRDTQ_x000B__x000B_	ATGGCCACCATTAGGGGTGCCATCGAACGCATTACAGACACCACCGTACGCACTACACTC CAAGAGGAGGCATGCCGCCAAATACGCGCTGAACTTAAAAACGTCGAGCACATCAACCGT TACGCTATACAGCCTGACGCCGCCGACGCACTCGAACACCTAGGCATTGGTTCTAACCCC TTCTCTGTGGCACTGCACACGCACGGTGCCTGCAAAGCGATTGAGAACCAATTACTCTAT GTAGTTGGTACCTTACTCCCAAAAGAACGTGTCACCATGCTCTTCCTTAAGAAAAGCAAG CTTAACATCATGAAACGCTGCCCTAAATTCCAAGACATCTTCCTGAACCAACATATCGAA CCACGTGACGTTTCTAGGTACTGCGACTTTAAC…
CYVCV	ZJ_1	KY933794	AVQ67741		RdRP (Partial)	China: Zhejiang	Citrus medica	MATIRGAIERITDTTVRTTLQEEACRQIRAELKNVEHINRYAIQPDAADALEHLGIGSNPFSVALHTHGA_x000B_CKAIENQLLYVVGTLFPKERVTMLFLKKSKLNIMKRCPKFQDIFLNQHIEPRDVSRYCDFNVQSTSTSIP_x000B_TRTAYISDTLHFMDRRDLVRLFLNSPNLETLYATIVLPVEAAYKQPSRYPEIYQINYDFDGFQYIPGGHG_x000B_GGAYHHEFEQLQWLDTGHIHWRGPDCKEIRMTVTAQMLESLGANHLFCFKRGKLLTPRVRTFGRDTQ	ATGGCCACTATTAGGGGTGCCATCGAACGCATTACAGACACCACAGTACGCACTACACTT CAAGAGGAGGCATGCCGCCAAATACGCGCTGAACTTAAAAACGTCGAACACATCAACCGT TACGCTATACAGCCTGACGCCGCCGACGCACTCGAACACCTAGGCATTGGTTCTAACCCC TTCTCTGTGGCACTGCACACGCACGGTGCCTGCAAAGCGATTGAGAACCAATTACTCTAT GTAGTTGGTACCTTATTCCCAAAAGAACGTGTCACCATGCTCTTCCTAAAGAAAAGCAAG CTCAACATCATGAAACGCTGCCCTAAATTCCAAGACATCTTCCTGAACCAACATATTGAA CCACGCGACGTTTCTAGGTACTGCGACTTTAAC…
CYVCV	JX-NF	KX156746	ASK39504	JX-NF	RdRP (Partial)	China	tangerine	MATIRGAIERITDTTVRTTLQEEACRQIRAELKNVEHINRYAIQPDAADALEHLGIGSNPFSVALHTHGA_x000B_CKAIENQLLYVVGTLLPKERVTMLFLKKSKLNIMKRCPKFQDIFLNQHIEPRDVSRYCDFNVQSTSTSIP_x000B_TRTAYISDTLHFMDRRDLVRLFLNSPNLETLYATIVLPVEAAYKQPSRYPEIYQINYDFDGFQYIPGGHG_x000B_GGAYHHEFEQLQWLDTGHIHWRGPDCKEIRMTITAQMLESLGANHLFCFKRGKLLTPRVRTFGRDTQ	ATGGCCACTATTAGGGGTGCCATCGAACGCATTACAGACACCACCGTACGCACTACACTT CAAGAGGAGGCATGCCGCCAAATACGCGCTGAACTTAAAAACGTCGAACACATCAACCGT TACGCTATACAGCCTGACGCCGCCGACGCACTCGAACACCTAGGCATTGGTTCTAACCCC TTCTCTGTGGCACTGCACACACACGGTGCCTGCAAAGCGATTGAGAACCAATTACTCTAT GTAGTTGGTACCTTACTCCCAAAAGAACGTGTCACCATGCTCTTCCTTAAGAAAAGCAAG CTCAACATCATGAAACGCTGCCCTAAATTCCAAGACATCTTCCTGAACCAACATATTGAA CCACGCGACGTTTCTAGGTACTGCGACTTTAAC…
CYVCV	HN-STJ	KX156745	ASK39498	HN-STJ	RdRP (Partial)	China	tangerine	MATIRGAIERITDTTVRTTLQEEACRQIRAELKNVEHINRYAIQPDAADALEHLGIGSNPFSVALHTHGA_x000B_CKAIENQLLYVVGTLLPKERVTMLFLKKSKLNIMKRCPKFQDIFLNQHIEPRDVSRYCDFNVQSTSTSIP_x000B_TRTAYISDTLHFMDRRDLVRLFLNSPNLETLYATIVLPVEAAYKQPSRYPEIYQINYDFDGFQYIPGGHG_x000B_GGAYHHEFEQLQWLDTGHIHWRGPDCKEIRMTITAQMLESLGANHLFCFKRGKLLTPRVRTFGRDTQ	ATGGCCACTATTAGGGGTGCCATCGAACGCATTACAGACACCACCGTACGCACTACACTT CAAGAGGAGGCATGCCGCCAAATACGCGCTGAACTTAAAAACGTCGAACACATCAACCGT TACGCTATACAGCCTGACGCCGCCGACGCACTCGAACACCTAGGCATTGGTTCTAACCCC TTCTCTGTGGCACTGCACACACACGGTGCCTGCAAAGCGATTGAGAACCAATTACTCTAT GTAGTTGGTACCTTACTCCCAAAAGAACGTGTCACCATGCTCTTCCTTAAGAAAAGCAAG CTCAACATCATGAAACGCTGCCCTAAATTCCAAGACATCTTCCTGAACCAACATATTGAA CCACGCGACGTTTCTAGGTACTGCGACTTTAAC…
CYVCV	SC-NH	KX156749	ASK39522	SC-NH	RdRP (Partial)	China	sweet orange	MATIRGAIERITDTTVRTTLQEEACRQIRAELKNVEHINRYAIQPDAADALEHLGIGSNPFSVALHTHGA_x000B_CKAIENQLLYVVGTLLPKERVTMLFLKKSKLNIMKRCPKFQDIFLNQHIEPRDVSRYCDFNVQSTSTSIP_x000B_TRTAYISDTLHFMDRRDLVRLFLNSPNLETLYATIVLPVEAAYKQPSRYPEIYQINYDFDGFQYIPGGHG_x000B_GGAYHHEFEQLQWLDTGHIHWRGPDCKEIRMTITAQMLESLGANHLFCFKRGKLLTPRVRTFGRDTQ	ATGGCCACTATTAGGGGTGCCATCGAACGCATTACAGACACCACCGTACGCACTACACTT CAAGAGGAGGCATGCCGCCAAATACGCGCTGAACTTAAAAACGTCGAACACATCAACCGT TACGCTATACAGCCTGACGCCGCCGACGCACTCGAACACCTAGGCATTGGTTCTAACCCC TTCTCTGTGGCACTGCACACGCACGGTGCCTGCAAAGCGATTGAGAACCAATTACTCTAT GTAGTTGGTACCTTACTCCCAAAAGAACGTGTCACCATGCTCTTCCTTAAGAAAAGCAAG CTCAACATCATGAAACGCTGCCCTAAATTCCAAGACATCTTCCTGAACCAACATATTGAA CCACGCGACGTCTCTAGGTACTGCGACTTTAAC…
CYVCV	RMGI	KT696511	AOO32382	RMGI	RdRP (Partial)	India	malta	MATIRGAIERITDTTVRTTLQEEACRQIRAELKNVEHINRYAIQPDAADALEHLGIGSNPFSVALHTHGA_x000B_CKAIENQLLYVVGTLLPKERVTMLFLKKSKLNIMKRCPKFQDIFLNQHIEPRDVSRYCDFNVQSTSTSIP_x000B_TRTAYISDTLHFMDRRDLVRLFLNSPNLETLYATIVLPVEAAYKQPSRYPEIYQINYDFDGFQYIPGGHG_x000B_GGAYHHEFEQLQWLDTGHIHWRGPDCKEIRMTITAQMLESLGANHLFCFKRGKLLTPRVRTFGRDTQ	ATGGCCACTATTAGGGGTGCCATCGAACGCATTACAGACACCACTGTACGCACTACACTT CAAGAGGAGGCATGTCGCCAAATACGCGCTGAACTTAAAAACGTCGAACACATCAACCGT TACGCTATACAGCCTGACGCCGCCGACGCACTCGAACACCTAGGCATTGGTTCTAACCCC TTCTCTGTAGCACTGCACACGCACGGTGCCTGCAAAGCGATTGAGAACCAATTACTCTAT GTAGTTGGTACCTTACTCCCAAAAGAACGTGTCACCATGCTCTTCCTTAAGAAAAGCAAG CTCAACATCATGAAACGCTGCCCTAAATTCCAAGACATCTTCCTGAACCAACACATCGAA CCACGCGACGTTTCTAGGTACTGCGACTTTAAC…
CYVCV	CA15	OQ418500	WRN92092	CA15	RdRP (Partial)	USA: California	lemon	MATIRGAIERITDTTVRTTLQEEACRQIRAELKNVEHINRYAIQPDAADALEHLGIGSNPFSVALHTHGA_x000B_CKAIENQLLYVVGTLLPKERVTMLFLKKSKLNIMKRCPKFQDIFLNQHIEPRDVSRYCDFNVQSTSTSIP_x000B_TRTAYISDTLHFMDRRDLVRLFLNSPNLETLYATIVLPVEAAYKQPSRYPEIYQINYDFDGFQYIPGGHG_x000B_GGAYHHEFEQLQWLDTGHIHWRGPDCKEIRMTITAQMLESLGANHLFCFKRGKLLTPRVRTFGRDTQ	GGCATGCCGCCAAATACGCGCTGAACTTAAAAACGTCGAACACATCAACCGTTACGCTAT ACAGCCTGACGCCGCCGACGCACTCGAACACCTAGGCATTGGATCTAACCCCTTCTCTGT GGCACTGCACACGCACGGTGCCTGTAAAGCGATCGAGAACCAATTACTCTATGTAGTTGG TACCCTACTCCCAAAAGAACGTGTCACCATGCTCTTCCTTAAGAAAAGCAAACTCAACAT CATGAAACGCTGCCCTAAATTCCAAGACATCTTCCTGAACCAACATATCGAGCCACGTGA CGTTTCTAGGTACTGCGACTTTAACGTCCAATCCACTTCCACCAGCATACCCACAAGAAC GGCTTACATCAGTGACACACTCCACTTCATGGA…
CYVCV	GJ3	OQ174723	WIL10287	GJ3	RdRP (Partial)	South Korea	persian lime	MATIRGAIERITDTTVRTTLQEEACRQIRAELKNVEHINRYAIQPDAADALEHLGIGSNPFSVALHTHGA_x000B_CKAIENQLLYVVGTLLPKERVTMLFLKKSKLNIMKRCPKFQDIFLNQHIEPRDVSRYCDFNVQSTSTSIP_x000B_TRTAYISDTLHFMDRRDLVRLFLNSPNLETLYATIVLPVEAAYKQPSRYPEIYQINYDFDGFQYIPGGHG_x000B_GGAYHHEFEQLQWLDTGHIHWRGPDCKEIRMTITAQMLESLGANHLFCFKRGKLLTPRVRTFGRDTQ	ATGGCCACTATTAGGGGTGCCATCGAACGCATTACAGACACCACCGTACGCACTACACTT CAAGAGGAGGCATGCCGCCAAATACGCGCTGAACTTAAAAACGTCGAACACATCAACCGT TACGCTATACAGCCTGACGCCGCCGACGCACTCGAACACCTAGGCATTGGTTCTAACCCC TTCTCTGTGGCACTGCACACGCACGGTGCCTGCAAAGCGATTGAGAACCAATTACTCTAT GTAGTTGGTACCTTACTCCCAAAAGAACGTGTCACCATGCTCTTCCTTAAGAAAAGCAAG CTCAACATCATGAAACGCTGCCCTAAATTCCAAGACATCTTCCTGAACCAACATATTGAA CCACGCGACGTTTCTAGGTACTGCGACTTTAAC…
CYVCV	ZJ_4	KY933797	AVQ67757	ZJ_4	RdRP (Partial)	China	Citrus reticulata x Citrus sinensis	MATIRGAIERITDTTVRTTLQEEACRQIRAELKNVEHINRYAIQPDAADALEHLGIGSNPFSVALHTHGA_x000B_CKAIENQLLYVVGTLLPKERVTMLFLKKSKLNIMKRCPKFQDIFLNQHIEPRDVSRYCDFNVQSTSTSIP_x000B_TRTAYISDTLHFMDRRDLVRLFLNSPNLETLYATIVLPVEAAYKRPCRYPEIYQINYDFDGFQYIPGGHG_x000B_GGAYHHEFEQLQWLDTGHIHWRGPDCKEIRMTVTAQMLESLGANHLFCFKRGKLLTPRVRTFGRDTQ	ATGGCCACTATTAGGGGTGCCATCGAACGCATTACAGACACCACAGTACGCACTACACTT CAAGAGGAGGCATGTCGCCAAATACGCGCTGAACTTAAAAACGTCGAACACATCAACCGT TACGCTATACAGCCTGACGCCGCCGACGCACTCGAACACCTAGGCATTGGTTCTAACCCC TTCTCTGTGGCACTGCACACGCACGGTGCCTGCAAAGCGATTGAGAACCAATTACTCTAT GTAGTTGGTACCTTACTCCCAAAAGAACGTGTCACCATGCTCTTCCTTAAGAAAAGCAAG CTCAACATCATGAAACGCTGCCCTAAATTCCAAGACATCTTCCTGAACCAACATATTGAA CCACGCGACGTTTCTAGGTACTGCGACTTTAAC…
CYVCV	BJ-QPJ	MK415928	QIN54978	BJ-QPJ	RdRP (Partial)	China: Yunnan	Qingpiju	MATIRGAIERITDTTVRTTLQEEACRQIRAELKNVEHINRYAIQPDAADALEHLGIGSNPFSVALHTHGA_x000B_CKAIENQLLYVVGTLLPKERVTMLFLKKSKLNIMKRCPKFQDIFPNQHIEPRDVSRYCDFNVQSTSTSIP_x000B_TRTAYISDTLHFMDRRDLVRLFINSPNLETLYATIVLPVEAAYKQPSRYPEIYQINYDFDGFQYIPGGHG_x000B_GGAYHHEFEQLQWLDTGHIHWRGPDCKEIRMTITAQMLESLGANHLFCFKRGKLHTPRVRTFGRDTQ	ATGGCCACTATTAGGGGTGCCATCGAACGCATTACAGACACCACCGTACGCACTACACTT CAAGAGGAGGCATGCCGCCAAATACGCGCTGAACTTAAAAACGTCGAACACATCAACCGT TACGCTATACAGCCTGACGCCGCCGACGCACTCGAACACCTAGGCATTGGTTCTAACCCC TTCTCTGTGGCACTGCACACGCACGGTGCCTGCAAAGCGATTGAGAACCAATTACTCTAT GTAGTTGGTACCTTACTCCCAAAAGAACGTGTCACCATGCTCTTCCTTAAGAAAAGCAAG CTCAACATCATGAAACGCTGCCCTAAATTCCAAGACATCTTCCCGAACCAACATATTGAA CCACGCGACGTTTCTAGGTACTGCGACTTCAAC…
CYVCV	JX	MF563877	AWV91519	JX	RdRP (Partial)	China: Jiangxi	navel orange cv. Newhall	MATIRGAIERITDTTVRTTLQEEACRQIRAELKNVEHINRYAIQPDAADALEHLGIGSNPFSVALHTHGA_x000B_CKAIENQLLYVVGTLLPKERVTMLFLKKSKLNIMKRCPKFQDIFLNQHIEPRDVSRYCDFNVQSTSTSIP_x000B_TRTAYTSDTLHFMDRRDLVRLFLNSPNLETLYATIVLPVEAAYKQPSRYPEIYQINYDFDGFQYIPGGHG_x000B_GGAYHHEFEQLQWLDTGHIHWRGPDCKEIRMTITAQMLESLGANHLFCFKRGKLLTPRVRTFGRDTQ	ATGGCCACTATTAGGGGTGCCATCGAACGCATTACAGACACCACCGTACGCACTACACTT CAAGAGGAGGCATGCCGCCAAATACGCGCTGAACTTAAAAACGTCGAACACATCAACCGT TACGCTATACAGCCTGACGCCGCCGACGCACTCGAACACCTAGGCATTGGTTCCAACCCC TTCTCTGTGGCACTGCACACGCACGGTGCCTGCAAAGCGATTGAGAACCAATTACTCTAT GTAGTTGGTACCTTACTCCCAAAAGAACGTGTCACCATGCTCTTCCTTAAGAAAAGCAAG CTCAACATCATGAAACGCTGCCCTAAATTCCAAGACATCTTCCTGAACCAACATATTGAA CCACGCGACGTTTCTAGGTACTGCGACTTTAAT…
CYVCV	CA19	OQ418504	WRN92116	CA19	RdRP (Partial)	USA: California	bearss lime	MATIRGAIERITDTTVRTTLQEEACRQIRAELKNIEHVNRYAIQPDAADALEHLGIGSNPFSVALHTHGA_x000B_CKAIENQLLYVVGTLLPKERVTMLFLKKSKLNIMKRCPKFQDIFLNQHIEPRDVSRYCDFNVQSTSTSIP_x000B_TRTAYISDTLHFMDRRDLVRLFLNSPNLETLYATIILPVEAAYRQPSRYPEIYQINYDFDGFQYIPGGHG_x000B_GGAYHHEFEQLQWLDTGHIHWRGPDCKEIRMTITAQMLESLGANHLFCFKRGKLLTPRVRTFGRDTQ	ATGGCCACTATTAGGGGTGCCATCGAACGCATTACAGACACCACCGTACGCACTACACTT CAAGAGGAGGCATGCCGCCAAATACGCGCTGAACTTAAAAACATCGAACACGTCAACCGT TACGCTATACAGCCTGACGCCGCCGACGCACTCGAACACCTAGGTATTGGCTCTAACCCC TTCTCTGTGGCACTGCACACGCACGGTGCCTGCAAAGCGATTGAGAACCAATTACTCTAT GTAGTTGGTACCTTACTACCAAAAGAACGTGTCACCATGCTCTTCCTTAAGAAAAGCAAG CTCAACATCATGAAACGCTGCCCTAAATTTCAAGACATCTTCCTGAACCAACATATAGAA CCACGTGACGTTTCTAGGTACTGCGACTTTAAC…
CYVCV	CA10	OQ418496	WRN92068	CA10	RdRP (Partial)	USA: California	grapefruit	MATIRGAIERITDTTVRTTLQEEACRQIRAELKNIEHINRYAIQPDAADALEHLGIGSNPFSVALHTHGA_x000B_CKAIENQLLYVVGTLLPKERVTMLFLKKSKLNIMKRCPKFQDIFLNQHIEPRDVSRYCDFNVQSTSTSIP_x000B_TRTAYISDTLHFMDRRDLVRLFLNSPNLETLYATIILPVEAAYRQPSRYPEIYQINYDFDGFQYIPGGHG_x000B_GGAYHHEFEQLQWLDTGHIHWRGPDCKEIRMTITAQMLESLGANHLFCFKRGKLLTPRVRTFGRDTQ	ATGGCCACTATTAGGGGTGCCATCGAACGCATTACAGACACCACCGTACGCACCACACTT CAAGAGGAGGCATGCCGCCAAATACGCGCTGAACTTAAAAACATCGAACACATCAACCGT TACGCTATACAGCCTGACGCCGCCGACGCACTCGAACACCTAGGTATTGGCTCTAACCCC TTCTCTGTGGCACTGCACACGCACGGTGCCTGCAAAGCGATTGAGAACCAATTACTCTAT GTAGTTGGTACCTTACTCCCAAAAGAGCGTGTCACCATGCTCTTCCTTAAGAAAAGCAAG CTCAACATCATGAAACGCTGCCCTAAATTTCAAGACATCTTCCTGAACCAACACATAGAA CCACGTGACGTTTCTAGGTACTGCGACTTTAAC…
CYVCV	PK	KP313241	AJO26405	PK	RdRP (Partial)	Pakistan	Galgal lemon	MATIRGAIERITDTTVRTTLQEEACRQIRAELKNVEHINRYAIQPDAADALEHLGIGSNPFSVALHTHGA_x000B_CKAIENQLLYVVGTLLPKERVTMLFLKKSKLNIMKRCPKFQDIFLNQHIEPRDVARYCDFNVQSTSTSIP_x000B_TRTAYISDTLHFMDRRDLVRLFINSPNLETLYATIVLPVEAAYKQPSRYPEIYQINYDFDGFQYIPGGHG_x000B_GGAYHHEFEQLQWLDTGHIHWRGPDCKEIRMTITAQMLESLGANHLFCFKRGKLLTPRVRTFGRDTQ	ATGGCCACTATTAGGGGTGCCATCGAACGCATTACAGACACCACCGTACGCACTACACTTCAAGAGGAGGCATGCCGCCAAATACGCGCCGAACTCAAAAACGTCGAACACATCAACCGTTACGCTATACAGCCTGACGCCGCCGACGCACTCGAACACCTAGGCATTGGCTCTAACCCTTTCTCTGTAGCACTGCACACGCACGGTGCCTGCAAAGCGATTGAGAACCAATTACTCTATGTAGTTGGTACCCTACTCCCAAAAGAACGTGTCACCATGCTCTTCCTTAAGAAAAGCAAGCTCAACATCATGAAACGCTGCCCTAAATTCCAAGACATCTTCCTGAACCAACATATCGAACCACGTGACGTTGCTAGGTACTGCGACTTTAACGTCCAA…
CYVCV	AY142	MW429489	WBG00075	AY142	RdRP (Partial)	China: Anyue, Sichuan	Eureka lemon	MATIRGAIERITDTTVRTTLQEEACRQIRAELKTVEHINRYAIQPDAADAPEHLGIGSNPFSVALHTHGA_x000B_CKAIENQLLYVVGTLLPKERVTMLFLKKSKLNIIKRCPKFQDIFLNQHIEPRDVSRYCDFNVQSTSTSIP_x000B_TRTAYISDTLHFMDRRDLVRLFLNSPNLETLYATIVLPVEAAYKQPSRYPEIYQINYDFDGFQYIPGGHG_x000B_GGAYHHEFEQLQWLDTGHIHWRGPDCKEIRMTITAQMLESLGANHLFCFKRGKLLTPRVRTFGRDTQ	ATGGCCACTATTAGGGGTGCCATCGAACGCATTACAGACACCACCGTACGCACTACACTC CAAGAGGAGGCATGCCGCCAAATACGCGCTGAACTTAAAACCGTCGAGCACATCAACCGT TACGCTATACAGCCTGACGCCGCCGACGCACCCGAACACCTAGGCATTGGTTCTAACCCC TTCTCTGTGGCACTGCACACGCACGGTGCCTGCAAAGCGATTGAGAACCAATTACTGTAT GTAGTTGGTACCTTACTCCCAAAAGAACGTGTCACCATGCTCTTCCTTAAGAAAAGCAAG CTCAACATCATAAAACGCTGCCCTAAATTCCAAGACATCTTCCTGAACCAACATATTGAA CCACGCGACGTTTCTAGGTACTGCGACTTTAAC…
CYVCV	SC-EL	KX156748	ASK39516	SC-EL	RdRP (Partial)	Sichuan, China	lemon	MATIRGAIERITDTTVRTTLQEEACRQIRAELKNVEHINRYAIQPDAADALEHLGIGSNPFSVALHTHGA_x000B_CKAIENQLLYVVGTLLPKERVTMLFLKKSKLNIMKRCPKFQDIFLNQHIEPRDVSRYCDFNVQSTSTSIP_x000B_TRTAYISDTLHFMDRRDLVRLFLNSPNLETLYATIVLPVEAAYKQPSRYPEIYQINYDFDGFQYIPGGHG_x000B_GGAYHHEFEQLQWLDTGHIHWRGPDCKEIRMTITAQMLESLGANHLFCFKRGKLLTPRVRTFGRDTQ	ATGGCCACTATTAGGGGTGCCATCGAACGCATTACAGACACCACCGTACGCACTACACTT CAAGAGGAGGCATGCCGCCAAATACGCGCTGAACTTAAAAACGTCGAACACATCAACCGT TACGCTATACAGCCTGACGCCGCCGACGCACTCGAACACCTAGGCATTGGTTCTAACCCC TTCTCTGTGGCACTGCACACGCACGGTGCCTGCAAAGCGATTGAGAACCAATTACTCTAT GTAGTTGGTACCTTACTCCCAAAAGAACGTGTCACCATGCTCTTCCTTAAGAAAAGCAAG CTCAACATCATGAAACGCTGCCCTAAATTCCAAGACATCTTCCTGAACCAACATATTGAA CCACGCGACGTCTCTAGGTACTGCGACTTTAAC…
CYVCV	KPMI	KT696513	AOO32394	KPMI	RdRP (Partial)	Pune: India	kinnow	MATIRGAIERITDTTVRTTLQEEACRQIRAELKNVEHINRYAIQPDAADALEHLGIGSNPFSVALHTHGA_x000B_CKAIENQLLYVVGTLLPKERVTMLFLKKSKLNIMKRCPKFQDIFLNQHIEPRDVSRYCDFNVQSTSTSIP_x000B_TRTAYISDTLHFMDRRDLVRLFLNSPNLETLYATIVLPVEAAYKQPSRYPEIYQINYDFDGFQYIPGGHG_x000B_GGAYHHEFEQLQWLDTGHIHWRGPDCKEIRMTITAQMLESLGANHLFCFKRGKLLTPRVRTFGRDTQ	ATGGCCACTATTAGGGGTGCCATCGAACGCATTACAGACACCACCGTACGCACTACACTT CAAGAGGAGGCATGCCGCCAAATACGCGCTGAACTTAAAAACGTCGAGCACATTAACCGT TACGCTATACAGCCTGACGCCGCCGACGCACTCGAACACCTAGGCATTGGCTCTAACCCC TTCTCTGTGGCACTGCACACGCACGGTGCCTGCAAAGCGATTGAGAACCAATTACTCTAT GTAGTTGGTACCTTACTCCCAAAAGAACGTGTCACCATGCTCTTCCTTAAGAAAAGCAAG CTCAACATCATGAAACGTTGCCCTAAATTCCAAGACATCTTCCTGAACCAACATATTGAA CCACGCGACGTTTCTAGGTACTGCGACTTTAAC…
CYVCV	GZ-GXP	KX156743	ASK39486	GZ-GXP	RdRP (Partial)	China	pummelo	MATIRGAIERITDTTVRTTLQEEACRQIRAELKNVEHINRYAIQPDAADALEHLGIGSNPFSVALHTHGA_x000B_CKAIENQLLYVVGTLLPKERVTMLFLKKSKLNIMKRCPKFQDIFLNQHIEPRDVSRYCDFNVQSTSTSIP_x000B_TRTAYISDTLHFMDRRDLVRLFLNSPNLETLYATIVLPVEAAYKQPSRYPEIYQINYDFDGFQYIPGGHG_x000B_GGAYHHEFEQLQWLDTGHIHWRGPDCKEIRMTITAQMLESLGANHLFCFKRGKLLTPRVRTFGRDTQ	ATGGCCACTATTAGGGGTGCCATCGAACGCATTACAGACACCACCGTACGCACTACACTT CAAGAGGAGGCATGCCGCCAAATACGCGCTGAACTTAAAAACGTCGAACACATCAACCGT TACGCTATACAGCCTGACGCCGCCGACGCACTCGAACACCTAGGCATTGGTTCTAACCCC TTCTCTGTGGCACTGCACACACACGGTGCCTGCAAAGCGATTGAGAACCAATTACTCTAT GTAGTTGGTACCTTACTCCCAAAAGAACGTGTCACCATGCTCTTCCTTAAGAAAAGCAAG CTCAACATCATGAAACGCTGCCCTAAATTCCAAGACATCTTCCTGAACCAACATATTGAA CCACGCGACGTTTCTAGGTACTGCGACTTTAAC…
CYVCV	GD-STP	KX156740	ASK39468	GD-STP	RdRP (Partial)	China	pummelo	MATIRGAIERITDTTVRTTLQEEACRQIRAELKNVEHINRYAIQPDAADALEHLGIGSNPFSVALHTHGA_x000B_CKAIENQLLYVVGTLLPKERVTMLFLKKSKLNIMKRCPKFQDIFLNQHIEPRDVSRYCDFNVQSTSTSIP_x000B_TRTAYISDTLHFMDRRDLVRLFLNSPNLETLYATIVLPVEAAYKQPSRYPEIYQINYDFDGFQYIPGGHG_x000B_GGAYHHEFEQLQWLDTGHIHWRGPDCKEIRMTITAQMLESLGANHLFCFKRGKLLTPRVRTFGRDTQ	ATGGCCACTATTAGGGGTGCCATCGAACGCATTACAGACACCACCGTACGCACTACACTT CAAGAGGAGGCATGCCGCCAAATACGCGCTGAACTTAAAAACGTCGAACACATCAACCGT TACGCTATACAGCCTGACGCCGCCGACGCACTCGAACACCTAGGCATTGGTTCTAACCCC TTCTCTGTGGCACTGCACACACACGGTGCCTGCAAAGCGATTGAGAACCAATTACTCTAT GTAGTTGGTACCTTACTCCCAAAAGAACGTGTCACCATGCTCTTCCTTAAGAAAAGCAAG CTCAACATCATGAAACGCTGCCCTAAATTCCAAGACATCTTCCTGAACCAACATATTGAA CCACGCGACGTTTCTAGGTACTGCGACTTTAAC…
CYVCV	GD-JG	KX156738	ASK39456	GD-JG	RdRP (Partial)	China	jiaogan	MATIRGAIERITDTTVRTTLQEEACRQIRAELKNVEHINRYAIQPDAADALEHLGIGSNPFSVALHTHGA_x000B_CKAIENQLLYVVGTLLPKERVTMLFLKKSKLNIMKRCPKFQDIFLNQHIEPRDVSRYCDFNVQSTSTSIP_x000B_TRTAYISDTLHFMDRRDLVRLFLNSPNLETLYATIVLPVEAAYKQPSRYPEIYQINYDFDGFQYIPGGHG_x000B_GGAYHHEFEQLQWLDTGHIHWRGPDCKEIRMTITAQMLESLGANHLFCFKRGKLLTPRVRTFGRDTQ	ATGGCCACTATTAGGGGTGCCATCGAACGCATTACAGACACCACCGTACGCACTACACTT CAAGAGGAGGCATGCCGCCAAATACGCGCTGAACTTAAAAACGTCGAACACATCAACCGT TACGCTATACAGCCTGACGCCGCCGACGCACTCGAACACCTAGGCATTGGTTCTAACCCC TTCTCTGTGGCACTGCACACACACGGTGCCTGCAAAGCGATTGAGAACCAATTACTCTAT GTAGTTGGTACCTTACTCCCAAAAGAACGTGTCACCATGCTCTTCCTTAAGAAAAGCAAG CTCAACATCATGAAACGCTGCCCTAAATTCCAAGACATCTTCCTGAACCAACATATTGAA CCACGCGACGTTTCTAGGTACTGCGACTTTAAC…
CYVCV	FJ-PK	KX156737	ASK39450		RdRP (Partial)	China	pokan	MATIRGAIERITDTTVRTTLQEEACRQIRAELKNVEHINRYAIQPDAADALEHLGIGSNPFSVALHTHGA_x000B_CKAIENQLLYVVGTLLPKERVTMLFLKKSKLNIMKRCPKFQDIFLNQHIEPRDVSRYCDFNVQSTSTSIP_x000B_TRTAYISDTLHFMDRRDLVRLFLNSPNLETLYATIVLPVEAAYKQPSRYPEIYQINYDFDGFQYIPGGHG_x000B_GGAYHHEFEQLQWLDTGHIHWRGPDCKEIRMTITAQMLESLGANHLFCFKRGKLLTPRVRTFGRDTQ	ATGGCCACTATTAGGGGTGCCATCGAACGCATTACAGACACCACCGTACGCACTACACTT CAAGAGGAGGCATGCCGCCAAATACGCGCTGAACTTAAAAACGTCGAACACATCAACCGT TACGCTATACAGCCTGACGCCGCCGACGCACTCGAACACCTAGGCATTGGTTCTAACCCC TTCTCTGTGGCACTGCACACACACGGTGCCTGCAAAGCGATTGAGAACCAATTACTCTAT GTAGTTGGTACCTTACTCCCAAAAGAACGTGTCACCATGCTCTTCCTTAAGAAAAGCAAG CTCAACATCATGAAACGCTGCCCTAAATTCCAAGACATCTTCCTGAACCAACATATTGAA CCACGCGACGTTTCTAGGTACTGCGACTTTAAC…
CYVCV	CQ	NC_026592	YP_009124988	CQ	RdRP (Partial)	China: Chongqing	Eureka lemon	MATIRGAIERITDTTVRTTLQEEACRQIRAELKNVEHINRYAIQPDAADALEHLGIGSNPFSVALHTHGA_x000B_CKAIENQLLYVVGTLLPKERVTMLFLKKSKLNIMKRCPKFQDIFLNQHIEPRDVSRYCDFNVQSTSTSIP_x000B_TRTAYISDTLHFMDRRDLVRLFLNSPNLETLYATIVLPVEAAYKQPSRYPEIYQINYDFDGFQYIPGGHG_x000B_GGAYHHEFEQLQWLDTGHIHWRGPDCKEIRMTITAQMLESLGANHLFCFKRGKLLTPRVRTFGRDTQ	ATGGCCACTATTAGGGGTGCCATCGAACGCATTACAGACACCACCGTACGCACTACACTT CAAGAGGAGGCATGCCGCCAAATACGCGCTGAACTTAAAAACGTCGAACACATCAACCGT TACGCTATACAGCCTGACGCCGCCGACGCACTCGAACACCTAGGCATTGGTTCTAACCCC TTCTCTGTGGCACTGCACACACACGGTGCCTGCAAAGCGATTGAGAACCAATTACTCTAT GTAGTTGGTACCTTACTCCCAAAAGAACGTGTCACCATGCTCTTCCTTAAGAAAAGCAAG CTCAACATCATGAAACGCTGCCCTAAATTCCAAGACATCTTCCTGAACCAACATATTGAA CCACGCGACGTTTCTAGGTACTGCGACTTTAAC…
CYVCV	YN-BTC	KX156750	ASK39528	YN-BTC	RdRP (Partial)	China	sweet orange	MATIRGAIERITDTTVRTTLQEEACRQIRAELKNVEHINRYAIQPDAADALEHLGIGSNPFSVALHTHGA_x000B_CKAIENQLLYVVGTLLPKERVTMLFLKKSKLNIMKRCPKFQDIFLNQHIEPRDVSRYCDFNVQSTSTSIP_x000B_TRTAYISDTLHFMDRRDLVRLFLNSPNLETLYATIVLPVEAAYKQPSRYPEIYQINYDFDGFQYIPGGHG_x000B_GGAYHHEFEQLQWLDTGHIHWRGPDCKEIRMTITAQMLESLGANHLFCFKRGKLLTPRVRTFGRDTQ	ATGGCCACTATTAGGGGTGCCATCGAACGCATTACAGACACCACCGTACGCACTACACTT CAAGAGGAGGCATGCCGCCAAATACGCGCTGAACTTAAAAACGTCGAACACATCAACCGT TACGCTATACAGCCTGACGCCGCCGACGCACTCGAACACCTAGGCATTGGTTCTAACCCC TTCTCTGTGGCACTGCACACGCACGGTGCCTGCAAAGCGATTGAGAACCAACTACTCTAC GTAGTTGGTACCTTACTCCCAAAAGAACGTGTCACCATGCTCTTCCTTAAGAAAAGCAAG CTCAACATCATGAAACGCTGCCCTAAATTCCAAGACATCTTCCTGAACCAACATATTGAA CCACGCGACGTTTCTAGGTACTGCGACTTTAAC…
CYVCV	YN-NH	KX156752	ASK39540	YN-NH	RdRP (Partial)	China	sweet orange	MATIRGAIERITDTTVRTTLQEEACRQIRAELKNVEHINRYAIQPDAADALEHLGIGSNPFSVALHTHGA_x000B_CKAIENQLLYVVGTLLPKERVTMLFLKKSKLNIMKRCPKFQDIFLNQHIEPRDVSRYCDFNVQSTSTSIP_x000B_TRTAYISDTLHFMDRRDLVRLFLNSPNLETLYATIVLPVEAAYKQPSRYPEIYQINYDFDGFQYIPGGHG_x000B_GGAYHHEFEQLQWLDTGHIHWRGPDCKEIRMTITAQMLESLGANHLFCFKRGKLLTPRVRTFGRDTQ	ATGGCCACTATTAGGGGTGCCATCGAACGCATTACAGACACCACCGTACGCACTACACTTCAAGAGGAGGCATGCCGCCAAATACGCGCTGAACTTAAAAACGTCGAACACATCAACCGTTACGCTATACAGCCTGACGCCGCCGACGCACTCGAACACCTAGGCATTGGTTCTAACCCCTTCTCTGTGGCACTGCACACGCACGGTGCCTGCAAAGCGATTGAGAACCAACTACTCTACGTAGTTGGTACCTTACTCCCAAAAGAACGTGTCACCATGCTCTTCCTTAAGAAAAGCAAGCTCAACATCATGAAACGCTGCCCTAAATTCCAAGACATCTTCCTGAACCAACATATTGAACCACGCGACGTTTCTAGGTACTGCGACTTTAACGTCCAA…
CYVCV	YN-EL	KX156751	ASK39534	YN-EL	RdRP (Partial)	China	lemon	MATIRGAIERITDTTVRTTLQEEACRQIRAELKNVEHINRYAIQPDAADALEHLGIGSNPFSVALHTHGA_x000B_CKAIENQLLYVVGTLLPKERVTMLFLKKSKLNIMKRCPKFQDIFLNQHIEPRDVSRYCDFNVQSTSTSIP_x000B_TRTAYISDTLHFMDRRDLVRLFLNSPNLETLYATIVLPVEAAYKQPSRYPEIYQINYDFDGFQYIPGGHG_x000B_GGAYHHEFEQLQWLDTGHIHWRGPDCKEIRMTITAQMLESLGANHLSCFKRGKLLTPRVRTFGRDTQ	ATGGCCACTATTAGGGGTGCCATCGAACGCATTACAGACACCACCGTACGCACTACACTC CAAGAGGAGGCATGCCGCCAAATACGCGCTGAACTTAAAAACGTCGAACACATCAACCGT TACGCTATACAGCCTGACGCCGCCGACGCACTCGAACACCTAGGCATTGGTTCTAACCCC TTCTCTGTGGCACTGCACACGCACGGTGCCTGCAAAGCGATTGAGAACCAACTACTCTAC GTAGTTGGTACCTTACTCCCAAAAGAACGTGTCACCATGCTCTTCCTTAAGAAAAGCAAG CTCAACATCATGAAACGCTGCCCTAAATTCCAAGACATCTTCCTGAACCAACATATTGAA CCACGCGACGTTTCTAGGTACTGCGACTTTAAC…
CYVCV	YN-SA	KX156734	ASK39432	YN-SA	RdRP (Partial)	China	Citrus unshiu (satsuma)	MATIRGAIERITDTTVRTTLQEEACRQIRAELKNVEHINRYAIQPDAADALEHLGIGSNPFSVALHTHGA_x000B_CKAIENQLLYVVGTLLPKERVTMLFLKKSKLNIMKRCPKFQDIFLNQHIEPRDVSRYCDFNVQSTSTSIP_x000B_TRTAYISDTLHFMDRRDLVRLFLNSPNLETLYATIVLPVEAAYKQPSRYPEIYQINYDFDGFQYIPGGHG_x000B_GGAYHHEFEQLQWLDTGHIHWRGPDCKEIRMTITAQMLESLGANHLSCFKRGKLLTPRVRTFGRDTQ	ATGGCCACTATTAGGGGTGCCATCGAACGCATTACAGACACCACCGTACGCACTACACTC CAAGAGGAGGCATGCCGCCAAATACGCGCTGAACTTAAAAACGTCGAACACATCAACCGT TACGCTATACAGCCTGACGCCGCCGACGCACTCGAACACCTAGGCATTGGTTCTAACCCC TTCTCTGTGGCACTGCACACGCACGGTGCCTGCAAAGCGATTGAGAACCAACTACTCTAC GTAGTTGGTACCTTACTCCCAAAAGAACGTGTCACCATGCTCTTCCTTAAGAAAAGCAAG CTCAACATCATGAAACGCTGCCCTAAATTCCAAGACATCTTCCTGAACCAACATATTGAA CCACGCGACGTTTCTAGGTACTGCGACTTTAAC…
CYVCV	HN-GXP	KX156744	ASK39492	HN-GXP	RdRP (Partial)	China	pummelo	MATIRGAIERITDTTVRTTLQEEACRQIRAELKNVEHINRYAIQPDAADALEHLGIGSNPFSVALHTHGA_x000B_CKAIENQLLYVVGTLLPKERVTMLFLKKSKLNIMKRCPKFQDIFLNQHIEPRDVSRYCDFNVQSTSTSIP_x000B_TRTAYISDTLHFMDRRDLVRLFLNSPNLETLYATIVLPVEAAYKQPSRYPEIYQINYDFDGFQYIPGGHG_x000B_GGAYHHEFEQLQWLDTGHIHWRGPDCKEIRMTITAQMLESLGANHLFCFKRGKLLTPRVRTFGRDTQ	ATGGCCACTATTAGGGGTGCCATCGAACGCATTACAGACACCACCGTACGCACTACACTT CAAGAGGAGGCATGCCGCCAAATACGCGCTGAACTTAAAAACGTCGAACACATCAACCGT TACGCTATACAGCCTGACGCCGCCGACGCACTCGAACACCTAGGCATCGGTTCTAACCCC TTCTCTGTGGCACTGCACACACACGGTGCCTGCAAAGCGATTGAGAACCAATTACTCTAT GTAGTTGGTACCTTACTCCCAAAAGAACGTGTCACCATGCTCTTCCTTAAGAAAAGCAAG CTCAACATCATGAAACGCTGCCCTAAATTCCAAGACATCTTCCTGAACCAACATATTGAA CCACGCGACGTTTCTAGGTACTGCGACTTTAAC…
CYVCV	CQ-TA	KX156736	ASK39444		RdRP (Partial)	China	tarocco	MATIRGAIERITDTTVRTTLQEEACRQIRAELKNVEHINRYAIQPDAADALEHLGIGSNPFSVALHTHGA_x000B_CKAIENQLLYVVGTLLPKERVTMLFLKKSKLNIMKRCPKFQDIFLNQHIEPRDVSRYCDFNVQSTSTSIP_x000B_TRTAYISDTLHFMDRRDLVRLFLNSPNLETLYATIVLPVEAAYKQPSRYPEIYQINYDFDGFQYIPGGHG_x000B_GGAYHHEFEQLQWLDTGHIHWRGPDCKEIRMTITAQMLESLGANHLFCFKRGKLLTPRVRTFGRDTQ	ATGGCCACTATTAGGGGTGCCATCGAACGCATTACAGACACCACCGTACGCACTACACTT CAAGAGGAGGCATGCCGCCAGATACGCGCTGAACTTAAAAACGTCGAACACATCAACCGT TACGCTATACAGCCTGACGCCGCCGACGCACTCGAACACCTAGGCATTGGTTCTAACCCC TTCTCTGTGGCACTGCACACACACGGTGCCTGCAAAGCGATTGAGAACCAATTACTCTAT GTAGTTGGTACCTTACTCCCAAAAGAACGTGTCACCATGCTCTTCCTTAAGAAAAGCAAG CTCAACATCATGAAACGCTGCCCTAAATTCCAAGACATCTTCCTGAACCAACATATTGAA CCACGCGACGTTTCTAGGTACTGCGACTTTAAC…
CYVCV	CQ-PO	KX156735	ASK39438		RdRP (Partial)	China	zaoyangxiaoyezhi (Trifoliate)	MATIRGAIERITDTTVRTTLQEEACRQIRAELKNVEHINRYAIQPDAADALEHLGIGSNPFSVALHTHGA_x000B_CKAIENQLLYVVGTLLPKERVTMLFLKKSKLNIMKRCPKFQDIFLNQHIEPRDVSRYCDFNVQSTSTSIP_x000B_TRTAYISDTLHFMDRRDLVRLFLNSPNLETLYATIVLPVEAAYKQPSRYPEIYQINYDFDGFQYIPGGHG_x000B_GGAYHHEFEQLQWLDTGHIHWRGPDCKEIRMTITAQMLESLGANHLFCFKRGKLLTPRVRTFGRDTQ	ATGGCCACTATTAGGGGTGCCATCGAACGCATTACAGACACCACCGTACGCACTACACTT CAAGAGGAGGCATGCCGCCAGATACGCGCTGAACTTAAAAACGTCGAACACATCAACCGT TACGCTATACAGCCTGACGCCGCCGACGCACTCGAACACCTAGGCATTGGTTCTAACCCC TTCTCTGTGGCACTGCACACACACGGTGCCTGCAAAGCGATTGAGAACCAATTACTCTAT GTAGTTGGTACCTTACTCCCAAAAGAACGTGTCACCATGCTCTTCCTTAAGAAAAGCAAG CTCAACATCATGAAACGCTGCCCTAAATTCCAAGACATCTTCCTGAACCAACATATTGAA CCACGCGACGTTTCTAGGTACTGCGACTTTAAC…
CYVCV	GX-STJ	KX156742	ASK39480	GX-STJ	RdRP (Partial)	China	tangerine	MATIRGAIERITDTTVRTTLQEEACRQIRAELKNVEHINRYAIQPDAADALEHLGIGSNPFSVALHTHGA_x000B_CKAIENQLLYVVGTLLPKERVTMLFLKKSKLNIMKRCPKFQDIFLNQHIEPRDVSRYCDFNVQSTSTSIP_x000B_TRTAYISDTLHFMDRRDLVRLFLNSPNLETLYATIVLPVEAAYKQPSRYPEIYQINYDFDGFQYIPGGHG_x000B_GGAYHHEFEQLQWLDTGHIHWRGPDCKEIRMTITAQMLESLGANHLFCFKRGKLLTPRVRTFGRDTQ	ATGGCCACTATTAGGGGTGCCATCGAACGCATTACAGACACCACCGTACGCACTACACTT CAAGAGGAGGCATGCCGCCAGATACGCGCTGAACTTAAAAACGTCGAACACATCAACCGT TACGCTATACAGCCTGACGCCGCCGACGCACTCGAACACCTAGGCATTGGTTCTAACCCC TTCTCTGTGGCACTGCACACACACGGTGCCTGCAAAGCGATTGAGAACCAATTACTCTAT GTAGTTGGTACCTTACTCCCAAAAGAACGTGTCACCATGCTCTTCCTTAAGAAAAGCAAG CTCAACATCATGAAACGCTGCCCTAAATTCCAAGACATCTTCCTGAACCAACATATTGAA CCACGCGACGTTTCTAGGTACTGCGACTTTAAC…
CYVCV	GJ1	OL581610	UYW66720	GJ1	RdRP (Partial)	South Korea	calamansi	MATIRGAIERITDTTVRTTLQEEACRQIRAELKNVEHINRYAIQPDAADALEHLGIGSNPFSVALHTHGA_x000B_CKAIENQLLYVVGTLLPKERVTMLFLKKSKLNIMKRCPKFQDIFLNQHIEPRDVSRYCDFNVQSTSTSIP_x000B_TRTAYISDTLHFMDRRDLVRLFLNSPNLETLYATIVLPVEAAYKQPSRYPEIYQINYDFDGFQYIPGGHG_x000B_GGAYHHEFEQLQWLDTGHIHWRGPDCKEIRMTITAQMLESLGANHLFCFKRGKLLTPRVRTFGRDTQ	ATGGCCACTATTAGGGGTGCCATCGAACGCATTACAGACACCACCGTACGCACTACACTT CAAGAGGAGGCATGCCGCCAAATACGCGCTGAACTTAAAAACGTCGAACACATCAACCGT TACGCTATACAGCCTGACGCCGCCGACGCACTCGAACACCTAGGCATTGGTTCTAACCCC TTCTCTGTGGCACTGCACACGCACGGTGCCTGCAAAGCGATTGAGAACCAATTACTCTAT GTAGTTGGTACCTTACTCCCAAAAGAACGTGTCACCATGCTCTTCCTTAAGAAAAGCAAG CTCAACATCATGAAACGCTGCCCTAAATTCCAAGACATCTTCCTGAACCAACATATTGAA CCACGCGACGTTTCTAGGTACTGCGACTTTAAC…
CYVCV	HU	KT124646	ANO39200	HU	RdRP (Partial)	China: Hunan	sweet orange grafted on trifoliate orange	MATIRGAIERITDTTVRTTLQEEACRQIRAELKNVEHINRYAIQPDAADALEHLGIGSNPFSVALHTHGA_x000B_CKAIENQLLYVVGTLLPKERVTMLFLKKSKLNIMKRCPKFQDIFLNQHIEPRDVSRYCDFNVQSTSTSIP_x000B_TRTAYISDTLHFMDRRDLVRLFLNSPNLETLYATIVLPVEAAYKQPSRYPEIYQINYDFDGFQYIPGGHG_x000B_GGAYHHEFEQLQWLDTGHIHWRGPDCKEIRMTITAQMLESLGANHLFCFKRGKLLTPRVRTFGRDTQ	ATGGCCACTATTAGGGGTGCCATCGAACGCATTACAGACACCACCGTACGCACTACACTT CAAGAGGAGGCATGCCGCCAAATACGCGCTGAACTTAAAAACGTCGAGCACATCAACCGT TACGCTATACAGCCTGACGCCGCCGACGCACTCGAACACCTAGGCATTGGTTCTAACCCC TTCTCTGTGGCACTGCACACGCACGGTGCCTGCAAAGCGATTGAGAACCAATTACTGTAT GTAGTTGGTACCTTACTCCCAAAAGAACGTGTCACCATGCTCTTCCTTAAGAAAAGCAAG CTCAACATCATGAAACGCTGCCCTAAATTCCAAGACATCTTCCTGAACCAACATATTGAA CCACGCGACGTTTCTAGGTACTGCGACTTTAAC…
CYVCV	RL	KP120977	AKG26806	RL	RdRP (Partial)	China	Citrus limon (eureka lemon)	MATIRGAIERITDTTVRTTLQEEACRQIRAELKTVEHINRYAIQPDAADALEHLGIGSNPFSVALHTHGA_x000B_CKAIENQLLYVVGTLLPKERVTMLFLKKSKLNIMKRCPKFQDIFLNQHIEPRDVSRYCDFNVQSTSTSIP_x000B_TRTAYISDTLHFMDRRDLVRLFLNSPNLETLYATIVLPVEAAYKQPSRYPEIYQINYDFDGFQYIPGGHG_x000B_GGAYHHEFEQLQWLDTGHIHWRGPDCKEIRMTITAQMLESLGANHLFCFKRGKLLTPRVRTFGRDTQ	ATGGCCACTATTAGGGGTGCCATCGAACGCATTACAGACACCACCGTACGCACTACACTC CAAGAGGAGGCATGCCGCCAAATACGCGCTGAACTTAAAACCGTCGAACACATCAACCGT TACGCTATACAGCCTGACGCCGCCGACGCACTCGAACACCTAGGCATTGGTTCTAACCCC TTCTCTGTGGCACTGCACACGCACGGTGCCTGCAAAGCGATTGAGAACCAATTACTCTAT GTAGTTGGTACCTTACTCCCAAAAGAACGTGTCACCATGCTCTTCCTTAAGAAAAGCAAG CTCAACATCATGAAACGCTGCCCTAAATTCCAAGACATCTTCCTGAACCAACATATTGAG CCACGCGACGTTTCTAGGTACTGCGACTTTAAC…
CYVCV	AY132	MW429488	WBG00069	AY132	RdRP (Partial)	China: Anyue, Sichuan	Eureka lemon	MATIRGAIERITDTTVRTTLQEEACRQIRAELKTVEHINRYAIQPDAADALEHLGIGSNPFSVALHTHGA_x000B_CKAIENQLLYVVGTLLPKERVTMLFLKKSKLNIMKRCPKFQDIFLNQHIEPRDVSRYCDFNVQSTSTSIP_x000B_TRTAYISDTLHFMDRRDLVRLFLNSPNLETLYATIVLPVEAAYKQPSRYPEIYQINYDFDGFQYIPGGHG_x000B_GGAYHHEFEQLQWLDTGHIHWRGPDCKEIRMTITAQMLESLGANHLFCFKRGKLHTPRVRTFGRDTQ	ATGGCCACTATTAGGGGTGCCATCGAACGCATTACAGACACCACCGTACGCACTACACTC CAAGAGGAGGCATGCCGCCAAATACGCGCTGAACTTAAAACCGTCGAACACATCAACCGT TACGCTATACAGCCTGACGCCGCCGACGCACTCGAACACCTAGGCATTGGTTCTAACCCC TTCTCTGTGGCACTGCACACGCACGGTGCCTGCAAAGCGATTGAGAACCAATTACTCTAT GTAGTTGGTACCTTACTCCCAAAAGAACGTGTCACCATGCTCTTCCTTAAGAAAAGCAAG CTCAACATCATGAAACGCTGCCCTAAATTCCAAGACATCTTCCTGAACCAACATATTGAG CCACGCGACGTTTCTAGGTACTGCGACTTTAAC…
CYVCV	AY112	MW429487	WBG00063	AY112	RdRP (Partial)	China: Anyue, Sichuan	Eureka lemon	MATIRGAIERITDTTVRTTLQEEACRQIRAELKTVEHINRYAIQPDAADAPEHLGIGSNPFSVALHTHGA_x000B_CKAIENQLLYVVGTLLPKERVTMLFLKKSKLNIIKRCPKFQDIFLNQHIEPRDVSRYCDFNVQSTSTSIP_x000B_TRTAYISDTLHFMDRRDLVRLFLNSPNLETLYATIVLPVEAAYKQPSRYPEIYQINYDFDGFQYIPGGHG_x000B_GGAYHHEFEQLQWLDTGHIHWRGPDCKEIRMTITAQMLESLGANHLFCFKRGKLLTPRVRTFGRDTQ	ATGGCCACTATTAGGGGTGCCATCGAACGCATTACAGACACCACCGTACGCACTACACTC CAAGAGGAGGCATGCCGCCAAATACGCGCTGAACTTAAAACCGTCGAACACATCAACCGT TACGCTATACAGCCTGACGCCGCCGACGCACCCGAACACCTAGGCATTGGTTCTAACCCC TTCTCTGTGGCACTGCACACGCACGGTGCCTGCAAAGCGATTGAGAACCAATTACTCTAT GTAGTTGGTACCTTACTCCCAAAAGAACGTGTCACCATGCTCTTCCTTAAGAAAAGCAAG CTCAACATCATAAAACGCTGCCCTAAATTCCAAGACATCTTCCTGAACCAACATATTGAG CCACGCGACGTTTCTAGGTACTGCGACTTTAAC…
CYVCV	AY212	MW429490	WBG00081	AY212	RdRP (Partial)	China: Anyue, Sichuan	Eureka lemon	MATIRGAIERITDTTVRTTLQEEACRQIRAELKTVEHINRYAIQPDAADAPEHLGIGSNPFSVALHTHGA_x000B_CKAIENQLLYVVGTLLPKERVTMLFLKKSKLNIMKRCPKFQDIFLNQHIEPRDVSRYCDFNVQSTSTSIP_x000B_TRTAYISDTLHFMDRRDLVRLFLNSPNLETLYATIVLPVEAAYKQPSRYPEIYQINYDFDGFQYIPGGHG_x000B_GGAYHHEFEQLQWLDTGHIHWRGPDCKEIRMTITAQMLESLGANHLFCFKRGKLHTPRVRTFGRDTQ	ATGGCCACTATTAGGGGTGCCATCGAACGCATTACAGACACCACCGTACGCACTACACTC CAAGAGGAGGCATGCCGCCAAATACGCGCTGAACTTAAAACCGTCGAACACATCAACCGT TACGCTATACAGCCTGACGCCGCCGACGCACCCGAACACCTAGGCATTGGTTCTAACCCC TTCTCTGTGGCACTGCACACGCACGGTGCCTGCAAAGCTATTGAGAACCAATTACTCTAT GTAGTTGGTACCTTACTCCCAAAAGAACGTGTCACCATGCTCTTCCTTAAGAAAAGCAAG CTCAACATCATGAAACGCTGCCCTAAATTCCAAGACATCTTCCTGAACCAACATATTGAG CCACGCGACGTTTCTAGGTACTGCGACTTTAAC…
CYVCV	CA16	OQ418501	WRN92098	CA16	RdRP (Partial)	USA: California	mandarin	MATIRGAIERITDTTVRTTLQEEACRQIRAELKNIEHINRYAIQPDAADALEHLGIGSNPFSVALHTHGA_x000B_CKAIENQLLYVVGTLLPKERVTMLFLKKSKLNIMKRCPKFQDIFLNQHIEPRDVSRYCDFNVQSTSTSIP_x000B_TRTAYISDTLHFMDRRDLVRLFLNSPNLETLYATIILPVEAAYRQPSRYPEIYQINYDFDGFQYIPGGHG_x000B_GGAYHHEFEQLQWLDTGHIHWRGPDCKEIRMTITAQMLESLGANHLFCFKRGKLLTPRVRTFGRDTQ	ATGGCCACTATTAGGGGTGCCATCGAACGCATTACAGACACCACCGTACGCACTACACTT CAAGAGGAGGCATGCCGCCAAATACGCGCTGAACTTAAAAACATCGAACACATCAACCGT TACGCTATACAGCCTGACGCCGCCGACGCACTCGAACACCTAGGTATTGGCTCTAACCCC TTCTCTGTGGCACTGCACACGCACGGTGCCTGCAAAGCGATTGAGAACCAATTACTCTAT GTAGTTGGTACCTTACTCCCAAAAGAACGTGTCACCATGCTCTTCCTTAAGAAAAGCAAG CTCAACATCATGAAACGCTGCCCTAAATTTCAAGACATCTTCCTGAACCAACATATAGAA CCACGTGACGTTTCTAGGTACTGCGACTTTAAC…
CYVCV	PALI	KT696512	AOO32388		RdRP (Partial)	India, Ludhiana	sweet orange	MATIRGAIERITDTTVRTTLQEEACRQIRAELKNVEHINRYAIQPDAADALEHLGIGSNPFSVALHTHGA_x000B_CKAIENQLLYVVGTLLPKERVTMLFLKKSKLNIMKRCPKFQDIFLNQHIEPRDVSRYCDFNVQSTSTSIP_x000B_TRTAYISDTLHFMDRRDLVRLFLNSPNLETLYATIVLPVEAAYKQPSRYPEIYQINYDFDGFQYIPGGHG_x000B_GGAYHHEFEQLQWLDTGHIHWRGPDCKEIRMTITAQMLESLGANHLFCFKRGKLLTPRVRTFGRDTQ	ATGGCCACTATTAGGGGTGCCATCGAACGCATTACAGACACCACCGTACGCACTACACTT CAAGAGGAGGCATGCCGCCAAATACGCGCTGAACTTAAAAACGTCGAACACATCAACCGT TACGCTATACAGCCTGACGCCGCCGACGCACTCGAACACCTAGGCATTGGTTCTAACCCC TTCTCTGTTGCACTGCACACGCACGGTGCCTGTAAAGCGATTGAGAACCAATTACTCTAT GTAGTTGGTACCTTACTCCCAAAAGAACGTGTCACCATGCTCTTCCTTAAGAAAAGCAAG CTCAACATCATGAAACGTTGCCCTAAATTCCAAGACATCTTCCTGAACCAACACATCGAA CCACGCGACGTTTCTAGGTACTGCGACTTTAAC…
CYVCV	CA14	OQ418499	WRN92086	CA14	RdRP (Partial)	USA: California	orange	MATIRGAIERITDTTVRTTLQEEACRQIRAELKNVEHINRYAIQPDAADALEHLGIGSNPFSVALHTHGA_x000B_CKAIENQLLYVVGTLLPKERVTMLFLKKSKLNIMKRCPKFQDIFLNQHIEPRDVSRYCDFNVQSTSTSIP_x000B_TRTAYISDTLHFMDRRDLVRLFLNSPNLETLYATIVLPVEAAYKQPSRYPEIYQINYDFDGFQYIPGGHG_x000B_GGAYHHEFEQLQWLDTGHIHWRGPDCKEIRMTITAQMLESLGANHLFCFKRGKLLTPRVRTFGRDTQ	ATGGCCACTATTAGGGGTGCCATCGAACGCATTACAGACACCACCGTACGCACTACACTT CAAGAGGAGGCATGCCGCCAAATACGCGCTGAACTTAAAAACGTCGAACACATCAACCGT TACGCTATACAGCCTGACGCCGCCGACGCACTCGAACACCTAGGCATTGGTTCTAACCCC TTCTCTGTGGCACTGCACACGCACGGTGCCTGCAAAGCGATCGAGAACCAATTACTCTAT GTAGTTGGTACCCTACTCCCAAAAGAACGTGTCACCATGCTCTTCCTTAAGAAAAGCAAA CTCAACATCATGAAACGCTGCCCTAAATTCCAAGACATCTTCCTGAACCAACATATCGAG CCACGTGACGTTTCTAGGTACTGCGACTTTAAC…
CYVCV	CA2	OR670060	WVD52754		RdRP (Partial)	USA	Citrus x limon cv. Eureka Lemon	MATIRGAIERITDTTVRTTLQEEACRQIRAELKNIEHINRYAIQPDAADALEHLGIGSNPFSVALHTHGA_x000B_CKAIENQLLYVVGTLLPKERVTMLFLKKSKLNIMKRCPKFQDIFLNQHIEPRDVSRYCDFNVQSTSTSIP_x000B_TRTAYISDTLHFMDRRDLVRLFLNSPNLETLYATIILPVEAAYRQPSRYPEIYQINYDFDGFQYIPGGHG_x000B_GGAYHHEFEQLQWLDTGHIHWRGPDCKEIRMTITAQMLESLGANHLFCFKRGKLLTPRVRTFGRDTQ	ATGGCCACTATTAGGGGTGCCATCGAACGCATTACAGACACCACCGTACGCACCACACTT CAAGAGGAGGCATGCCGCCAAATACGCGCTGAACTTAAAAACATCGAACACATCAACCGT TACGCTATACAGCCTGACGCCGCCGACGCACTCGAACACCTAGGTATTGGCTCTAACCCC TTCTCTGTGGCACTGCACACGCACGGTGCCTGCAAAGCGATTGAGAACCAATTACTCTAT GTAGTTGGTACCTTACTCCCAAAAGAACGTGTCACCATGCTCTTCCTTAAGAAAAGCAAG CTCAACATCATGAAACGCTGCCCTAAATTTCAAGACATCTTCCTGAACCAACACATAGAA CCACGTGACGTTTCTAGGTACTGCGACTTTAAC…
CYVCV	CA20	OQ418505	WRN92122		RdRP (Partial)	USA: California	citron	MATIRGAIERITDTTVRTTLQEEACRQIRAELKNIEHVNRYAIQPDAADALEHLGIGSNPFSVALHTHGA_x000B_CKAIENQLLYVVGTLLPKERVTMLFLKKSKLNIMKRCPKFQDIFLNQHIEPRDVSRYCDFNVQSTSTSIP_x000B_TRTAYISDTLHFMDRRDLVRLFLNSPNLETLYATIILPVEAAYRQPSRYPEIYQINYDFDGFQYIPGGHG_x000B_GGAYHHEFEQLQWLDTGHIHWRGPDCKEIRMTITAQMLESLGANHLFCFKRGKLLTPRVRTFGRDTQ	ATGGCCACTATTAGGGGTGCCATCGAACGCATTACAGACACCACCGTACGCACTACACTT CAAGAGGAGGCATGCCGCCAAATACGCGCTGAACTTAAAAACATCGAACACGTCAACCGT TACGCTATACAGCCTGACGCCGCCGACGCACTCGAACACCTAGGTATTGGCTCTAACCCC TTCTCTGTGGCACTGCACACGCACGGTGCCTGCAAAGCGATTGAGAACCAATTACTCTAT GTAGTTGGTACCTTACTCCCAAAAGAACGTGTCACCATGCTCTTCCTTAAGAAAAGCAAG CTCAACATCATGAAACGCTGCCCTAAATTTCAAGACATCTTCCTGAACCAACATATAGAA CCACGTGACGTTTCTAGGTACTGCGACTTTAAC…
CYVCV	CA13	OQ418498	WRN92080	CA13	RdRP (Partial)	USA: California	kumquat	MATIRGAIERITDTTVRTTLQEEACRQIRAELKNIEHINRYAIQPDAADALEHLGIGSNPFSVALHTHGA_x000B_CKAIENQLLYVVGTLLPKERVTMLFLKKSKLNIMKRCPKFQDIFLNQHIEPRDVSRYCDFNVQSTSTSIP_x000B_TRTAYISDTLHFMDRRDLVRLFLNSPNLETLYATIILPVEAAYRQPSRYPEIYQINYDFDGFQYIPGGHG_x000B_GGAYHHEFEQLQWLDTGHIHWRGPDCKEIRMTITAQMLESLGANHLFCFKRGKLLTPRVRTFGRDTQ	ATGGCCACTATTAGGGGTGCCATCGAACGCATTACAGACACCACCGTACGCACCACACTT CAAGAGGAGGCATGCCGCCAAATACGCGCTGAACTTAAAAACATCGAACACATCAACCGT TACGCTATACAGCCTGACGCCGCCGACGCACTCGAACACCTAGGTATTGGCTCTAACCCC TTCTCTGTGGCACTGCACACGCACGGTGCCTGCAAAGCGATTGAGAACCAATTACTCTAT GTAGTTGGTACCTTACTCCCAAAAGAACGTGTCACCATGCTCTTCCTTAAGAAAAGCAAG CTCAACATCATGAAACGCTGCCCTAAATTTCAAGACATCTTCCTGAACCAACACATAGAA CCACGTGACGTTTCTAGGTACTGCGACTTTAAC…
CYVCV	CA8	OQ418494	WRN92056	CA13	RdRP (Partial)	USA: California	lemon	MATIRGAIERITDTTVRTTLQEEACRQIRAELKNIEHINRYAIQPDAADALEHLGIGSNPFSVALHTHGA_x000B_CKAIENQLLYVVGTLLPKERVTMLFLKKSKLNIMKRCPKFQDIFLNQHIEPRDVSRYCDFNVQSTSTSIP_x000B_TRTAYISDTLHFMDRRDLVRLFLNSPNLETLYATIILPVEAAYRQPSRYPEIYQINYDFDGFQYIPGGHG_x000B_GGAYHHEFEQLQWLDTGHIHWRGPDCKEIRMTITAQMLESLGANHLFCFKRGKLLTPRVRTFGRDTQ	ATGGCCACTATTAGGGGTGCCATCGAACGCATTACAGACACCACCGTACGCACCACACTT CAAGAGGAGGCATGCCGCCAAATACGCGCTGAACTTAAAAACATCGAACACATCAACCGT TACGCTATACAGCCTGACGCCGCCGACGCACTCGAACACCTAGGTATTGGCTCTAACCCC TTCTCTGTGGCACTGCACACGCACGGTGCCTGCAAAGCGATTGAGAACCAATTACTCTAT GTAGTTGGTACCTTACTCCCAAAAGAACGTGTCACCATGCTCTTCCTTAAGAAAAGCAAG CTCAACATCATGAAACGCTGCCCTAAATTTCAAGACATCTTCCTGAACCAACACATAGAA CCACGTGACGTTTCTAGGTACTGCGACTTTAAC…
CYVCV	CA1	OQ418489	WRN92026	CA1	RdRP (Partial)	USA: California	lemon	MATIRGAIERITDTTVRTTLQEEACRQIRAELKNIEHINRYAIQPDAADALEHLGIGSNPFSVALHTHGA_x000B_CKAIENQLLYVVGTLLPKERVTMLFLKKSKLNIMKRCPKFQDIFLNQHIEPRDVSRYCDFNVQSTSTSIP_x000B_TRTAYISDTLHFMDRRDLVRLFLNSPNLETLYATIILPVEAAYRQPSRYPEIYQINYDFDGFQYIPGGHG_x000B_GGAYHHEFEQLQWLDTGHIHWRGPDCKEIRMTITAQMLESLGANHLFCFKRGKLLTPRVRTFGRDTQ	ATGGCCACTATTAGGGGTGCCATCGAACGCATTACAGACACCACCGTACGCACCACACTT CAAGAGGAGGCATGCCGCCAAATACGCGCTGAACTTAAAAACATCGAACACATCAACCGT TACGCTATACAGCCTGACGCCGCCGACGCACTCGAACACCTAGGTATTGGCTCTAACCCC TTCTCTGTGGCACTGCACACGCACGGTGCCTGCAAAGCGATTGAGAACCAATTACTCTAT GTAGTTGGTACCTTACTCCCAAAAGAACGTGTCACCATGCTCTTCCTTAAGAAAAGCAAG CTCAACATCATGAAACGCTGCCCTAAATTTCAAGACATCTTCCTGAACCAACACATAGAA CCACGTGACGTTTCTAGGTACTGCGACTTTAAT…
CYVCV	CA12	OQ418497	WRN92074	CA12	RdRP (Partial)	USA: California	kumquat	MATIRGAIERITDTTVRTTLQEEACRQIRAELKNIEHINRYAIQPDAADALEHLGIGSNPFSVALHTHGA_x000B_CKAIENQLLYVVGTLLPKERVTMLFLKKSKLNIMKRCPKFQDIFLNQHIEPRDVSRYCDFNVQSTSTSIP_x000B_TRTAYISDTLHFMDRRDLVRLFLNSPNLETLYATIILPVEAAYRQPSRYPEIYQINYDFDGFQYIPGGHG_x000B_GGAYHHEFEQLQWLDTGHIHWRGPDCKEIRMTITAQMLESLGANHLFCFKRGKLLTPRVRTFGRDTQ	ATGGCCACTATTAGGGGTGCCATCGAACGCATTACAGACACCACCGTACGCACCACACTT CAAGAGGAGGCATGCCGCCAAATACGCGCTGAACTTAAAAACATCGAACACATCAACCGT TACGCTATACAGCCTGACGCCGCCGACGCACTCGAACACCTAGGTATTGGCTCTAACCCC TTCTCTGTGGCACTGCACACGCACGGTGCCTGCAAAGCGATTGAGAACCAATTACTCTAT GTAGTTGGTACCTTACTCCCAAAAGAGCGTGTCACCATGCTCTTCCTTAAGAAAAGCAAG CTCAACATCATGAAACGCTGCCCTAAATTTCAAGACATCTTCCTGAACCAACACATAGAA CCACGTGACGTTTCTAGGTACTGCGACTTTAAC…
CYVCV	CA9	OQ418495	WRN92062	CA9	RdRP (Partial)	USA: California	mexican lime	MATIRGAIERITDTTVRTTLQEEACRQIRAELKNIEHINRYAIQPDAADALEHLGIGSNPFSVALHTHGA_x000B_CKAIENQLLYVVGTLLPKERVTMLFLKKSKLNIMKRCPKFQDIFLNQHIEPRDVSRYCDFNVQSTSTSIP_x000B_TRTAYISDTLHFMDRRDLVRLFLNSPNLETLYATIILPVEAAYRQPSRYPEIYQINYDFDGFQYIPGGHG_x000B_GGAYHHEFEQLQWLDTGHIHWRGPDCKEIRMTITAQMLESLGANHLFCFKRGKLLTPRVRTFGRDTQ	ATGGCCACTATTAGGGGTGCCATCGAACGCATTACAGACACCACCGTACGCACCACACTT CAAGAGGAGGCATGCCGCCAAATACGCGCTGAACTTAAAAACATCGAACACATCAACCGT TACGCTATACAGCCTGACGCCGCCGACGCACTCGAACACCTAGGTATTGGCTCTAACCCC TTCTCTGTGGCACTGCACACGCACGGTGCCTGCAAAGCGATTGAGAACCAATTACTCTAT GTAGTTGGTACCTTACTCCCAAAAGAGCGTGTCACCATGCTCTTCCTTAAGAAAAGCAAG CTCAACATCATGAAACGCTGCCCTAAATTTCAAGACATCTTCCTGAACCAACACATAGAA CCACGTGACGTTTCTAGGTACTGCGACTTTAAC…
CYVCV	CA4	OQ418492	WRN92044		RdRP (Partial)	USA: California	orange	MATIRGAIERITDTTVRTTLQEEACRQIRAELKNIEHINRYAIQPDAADALEHLGIGSNPFSVALHTHGA_x000B_CKAIENQLLYVVGTLLPKERVTMLFLKKSKLNIMKRCPKFQDIFLNQHIEPRDVSRYCDFNVQSTSTSIP_x000B_TRTAYISDTLHFMDRRDLVRLFLNSPNLETLYATIILPVEAAYRQPSRYPEIYQINYDFDGFQYIPGGHG_x000B_GGAYHHEFEQLQWLDTGHIHWRGPDCKEIRMTITAQMLESLGANHLFCFKRGKLLTPRVRTFGRDTQ	ATGGCCACTATTAGGGGTGCCATCGAACGCATTACAGACACCACCGTACGCACCACACTT CAAGAGGAGGCATGCCGCCAAATACGCGCTGAACTTAAAAACATCGAACACATCAACCGT TACGCTATACAGCCTGACGCCGCCGACGCACTCGAACACCTAGGTATTGGCTCTAACCCC TTCTCTGTGGCACTGCACACGCACGGTGCCTGCAAAGCGATTGAGAACCAATTACTCTAT GTAGTTGGTACCTTACTCCCAAAAGAGCGTGTCACCATGCTCTTCCTTAAGAAAAGCAAG CTCAACATCATGAAACGCTGCCCTAAATTTCAAGACATCTTCCTGAACCAACACATAGAA CCACGTGACGTTTCTAGGTACTGCGACTTTAAC…
CYVCV	YN-XP	ON513420	WCR39901	YN-XP	RdRP (Partial)	China: Yunnan	Diaphorina citri	TLQEEACRQIRAELKNVEHINRYAIQPDAADALEHLGIGSNPFSVALHTHGACKAIENQLLYVVGTLLPK_x000B_ERVTMLFLKKSKLNIMKRCPKFQDIFLNQHIEPRDVSRYCDFNVQSTSTSIPTRTAYISDTLHFMDRRDL_x000B_VRLFLNSPNLETLYATIVLPVEAAYKQPSRYPEIYQINYDFDGFQYIPGGHGGGAYHHEFEQLQWLDTGH_x000B_IHWRGPDCKEIRMTITAQMLESLGANHLFCFKRGKLLTPRVRTFGRDTQ	ACACTTCAAGAGGAGGCATGCCGCCAAATACGCGCTGAACTTAAAAACGTCGAACACATC AACCGTTACGCTATACAGCCTGACGCCGCCGACGCACTCGAACACCTAGGCATTGGTTCT AACCCCTTCTCTGTGGCACTGCACACGCACGGTGCCTGCAAAGCGATTGAGAACCAATTA CTCTATGTAGTTGGTACCTTACTCCCAAAAGAACGTGTCACCATGCTCTTCCTTAAGAAA AGCAAGCTCAACATCATGAAACGCTGCCCTAAATTCCAGGACATCTTCCTGAACCAACAT ATTGAACCACGCGACGTTTCTAGGTACTGCGACTTTAACGTCCAATCTACTTCCACCAGC ATACCCACACGAACGGCTTACATCAGTGACACA…
CYVCV	ECAI	KT696510	AOO32376	ECAI	RdRP (Partial)	India; Abohar	etrog citron	MATIRGAIERITDTTVRTTLQEEACRQIRAELKNVEHINRYAIQPDAADALEHLGIGSNPFSVALHTHGA_x000B_CKAIENQLLYVVGTLLPKERVTMLFLKKSKLNIMKRCPKFQDIFLNQHIEPRDVSRYCDFNVQSTSTSIP_x000B_TRTAYISDTLHFMDRRDLVRLFLNSPNLETLYATIVLPVEAAYKQPSRYPEIYQINYDFDGFQYIPGGHG_x000B_GGAYHHEFEQLQWLDTGHIHWRGPDCKEIRMTITAQMLESLGANHLFCFKRGKLLTPRVRTFGRDTQ	ATGGCCACTATTAGGGGTGCCATCGAACGCATTACAGACACTACCGTCCGCACTACACTT CAAGAGGAGGCATGCCGCCAAATACGCGCTGAACTTAAAAACGTCGAACACATCAACCGT TACGCTATACAGCCTGACGCCGCCGACGCACTCGAGCACCTAGGCATTGGCTCTAACCCC TTCTCTGTGGCACTGCACACACACGGTGCCTGTAAAGCGATCGAGAACCAATTACTCTAT GTAGTTGGTACCCTACTCCCAAAAGAACGTGTCACCATGCTCTTCCTTAAGAAAAGTAAG CTCAACATCATGAAACGCTGCCCTAAATTCCAAGACATCTTCCTGAACCAACACATCGAA CCACGTGACGTTTCTAGGTACTGCGATTTTAAC…
ICRV	K1	NC_003093	NP_203553		RdRP (Partial)_x000B_ICRSV-A	India	Kinnow mandarin	MATIRGAIDRITDTTVRTTLQEEACRQIRTELKNVEHVNRYAIPPDAADALEHLGIGTNPFSVKLHTHGA_x000B_CKAIENQLLYVVGTLLPKERVTMLFLKKAKLNFMKRCPKFQDIFLNQHIEPRDVSRYCDFNVQSTSTSIP_x000B_THTAYISDTLHFMDRKDLVRLFINSPNLDTLYATIVLPVEAAYRQPSRYPDLYQINYDFDGFQYIPGGHG_x000B_GGAYHHEFSHLEWLDVGHIHWRGPDNKDIQLTITAQMIESLGANHLFCFRRGNLRTPRVRTFGRDTQ	ATGGCCACTATTAGGGGTGCCATCGATCGTATCACAGACACCACCGTACGCACGACACTACAGGAGGAGGCTTGCAGACAAATCCGTACCGAACTTAAGAACGTAGAACATGTTAACAGGTACGCCATCCCGCCAGATGCCGCAGACGCCCTAGAACATCTTGGCATTGGCACCAACCCCTTCTCGGTCAAATTGCATACACACGGTGCCTGTAAAGCGATCGAAAACCAGCTACTCTACGTAGTTGGTACTTTGCTACCAAAAGAAAGAGTCACCATGCTCTTCCTTAAGAAAGCTAAGCTCAACTTCATGAAGAGATGCCCGAAGTTCCAAGACATCTTCCTAAATCAGCACATAGAACCTAGGGACGTCTCAAGATACTGCGATTTCAACGTGCAA…
ICRV	Pune	HQ324250	AEK87110	Pune	RdRP (Partial)_x000B_ICRSV-B	India	sweet orange	MATIRGAIDRITDTTVRTTLQEEACRQIRTELKNVEHVNRYAIPPDAADALEHLGIGTNPFSVKLHTHGA_x000B_CKAIENQLLYVVGTLLPKERVTMLFLKKSKLNFMKRCPKFQDIFLNQHIEPRDVSRYCDFNVQSTSTSIP_x000B_THTAYISDTLHFMDRKDLVRLFINSPNLDTLYATIVLPVEAAYRQPSRYPDLYQINYDFDGFQYIPGGHG_x000B_GGAYHHEFNHLEWLDVGHIHWRGPDNKDVQLTITAQMIESLGANHLFCFRRGNLRTPRVRTFGRDTQ	ATGGCCACTATTAGGGGTGCCATCGATCGTATCACAGACACCACCGTACGCACGACACTA CAGGAGGAGGCTTGCAGACAAATCCGTACCGAACTTAAGAACGTAGAACATGTTAATAGG TACGCCATCCCGCCAGATGCCGCAGACGCCCTAGAACATCTTGGCATTGGCACCAACCCC TTCTCGGTCAAATTGCATACACACGGTGCCTGTAAAGCGATCGAAAACCAGCTACTCTAC GTAGTTGGTACTTTGCTACCAAAAGAAAGAGTTACCATGCTCTTTCTTAAGAAATCTAAG CTCAACTTCATGAAGAGATGCCCGAAGTTCCAAGACATCTTCCTAAATCAGCACATAGAA CCTAGGGACGTCTCAAGATACTGCGATTTCAAC…
CiYMV	PS	HQ324250	YP_010798308	Pune	RdRP (Partial)	Pakistan	Citrus reticulata cv. kinnow mandarin	MATIRGAIDRITDTTVRTTLQEEACRQIRTELKHVEHINKFAIQPDAADALEHLGIGSNPFSIKLHTHGA_x000B_CKAIENQLLYVVGTLLPKERVTMLFLKKSKLNIMKRCPKFQDIFLNQHIEPRDVSRYCDFNVQSTATSIP_x000B_TQTAYISDTLHFMTRKDLMRLFINSPTLETLYATIVLPVEAAYKQPSRYPEIYHINYDFEGFQYIPGGHG_x000B_GGAYHHEFEQLEWLDVGHIHFKDPEKYETQLTITAQLIESLGANHLFCFKRGKLSTPRVRTFGRDTQ	ATGGCTACTATTAGGGGTGCTATTGACCGCATTACTGACACAACTGTGCGTACCACATTG CAAGAGGAAGCATGCAGGCAAATTCGAACAGAGCTCAAGCATGTCGAGCATATCAATAAG TTTGCCATACAACCAGATGCCGCAGATGCACTTGAACATCTTGGCATCGGATCGAATCCT TTCTCTATCAAACTACACACACATGGGGCCTGCAAGGCTATAGAGAACCAATTACTGTAT GTAGTTGGCACCCTTCTGCCCAAGGAACGTGTCACCATGCTCTTCCTAAAGAAGAGCAAA CTCAACATTATGAAACGATGTCCGAAATTCCAGGATATATTCCTAAACCAACACATCGAA CCAAGAGACGTCTCACGCTACTGCGACTTCAAC…
ICRV	SIRSA-1	MT439335; MN422617; MN422618	QIU78629; QIU78630;	H-K-SIR-44	coat protein_x000B_ICRSV-B	India: Haryana; India: Punjab; India: Sirsa, Haryana	Citrus sp. cv. Kinnow	MSFDYTHPLYRSYPFPHYCEFDRHQLCDHHPVLKPPTHKPSAPNSLMSTDDNKGKQPLHPTPSGPNDKTP_x000B_KPTPVLTPSATPTAAGKENQEPIEKRIIHAFHAEAKTHNNGVSPPAFNPNNMNAVPLNLLNLNLRYSPVT_x000B_NSIANPKQTEAIGKAWVRILNIDPANVFLYAIDLARACADAGSSPEADIIGANEDLNPVVERNALALVVR_x000B_DFCPLRAFCAYYSRVVWNLMIKADQPPANWMKSGVDENAKFAAFDFFHGILSPASLYVPLERHPTSAERI_x000B_ANQAMFAVKIANAPGNGTDLTMDHVAFTKGKITQPSGLRPTPFNT	ATGAGCTTTGACTACACACACCCTCTCTACCGCAGCTATCCATTTCCACACTACTGCGAGTTCGACCGGCACCAACTCTGCGACCATCATCCAGTACTCAAACCTCCAACTCACAAACCCAGTGCCCCGAACTCTCTCATGTCTACCGACGACAACAAGGGCAAACAACCACTTCACCCGACACCTTCGGGCCCTAACGACAAGACCCCAAAACCTACCCCCGTACTCACTCCCTCAGCTACGCCCACAGCTGCAGGTAAGGAAAACCAGGAGCCCATCGAAAAGCGTATCATACACGCTTTCCACGCTGAAGCAAAAACCCACAACAATGGGGTCTCTCCACCTGCCTTTAACCCGAACAACATGAACGCTGTGCCGCTGAACCTGCTTAACCTCAAC…
ICRV	BTI-37	MW233692	UOF76648	P-K-BTI-37	coat protein_x000B_ICRSV-B	India: Bathinda, Punjab	kinnow	MSFDYTHPLYRSYPFPHYCEFDRHQLCDHHPVLKPPTHKPSAPNSLMSTDDNKGKQPLHPTPSGPNDKTP_x000B_KPTPVLTPSATPTAAGKENQEPIEKRIIHAFHAEAKTHNNGVSPPAFNPNNMNAVPLNLLNLNLRYSPVT_x000B_NSIANPKQTEAIGKAWVRILNIDPANVFLYAIDLARACADAGSSPEADIIGANEDLNPVVERNALALVVR_x000B_DFCPLRAFCAYYSRVVWNLMIKADQPPANWMKSGVDENAKFAAFDFFHGILSPASLYVPLERHPTSAERI_x000B_ANQAMFAVKIANAPGNGTDLTMDHVAFTKGKITQPSGLRPTPFNT	ATGAGCTTTGACTACACACACCCTCTCTACCGCAGCTATCCATTTCCACACTACTGCGAGTTCGACCGGC_x000B_ACCAACTCTGCGACCATCATCCAGTACTCAAACCTCCAACTCACAAACCCAGTGCCCCGAACTCTCTCAT_x000B_GTCTACCGACGACAACAAGGGCAAACAACCACTTCACCCGACACCTTCGGGCCCTAACGACAAGACCCCA_x000B_AAACCTACCCCCGTACTCACTCCCTCAGCTACGCCCACAGCTGCAGGTAAGGAAAACCAGGAGCCCATCG_x000B_AAAAGCGTATCATACACGCTTTCCACGCTGAAGCAAAAACCCACAACAATGGGGTCTCTCCACCTGCCTT_x000B_TAACCCGAACAACA…
ICRV	Ahm	AY255007	AAO72985		coat protein_x000B_ICRSV-B_x000B_	India: Ahmedabad		MSFDYTHPLYRSYPFPHYCEFDRHQLCDHHPVLKPPTHKPSAPNSLMSTDDNKGKQPLHPTPSGPNDKTP_x000B_KPTPVLTPSATPTAAGKENQEPIEKRIIHAFHAEAKTHNNGVSPPAFNPNNMNAVPLNLLNLNLRYSPVT_x000B_NSIANPKQTEAIGKAWVRILNIDPANVFLYAIDLARACADAGSSPEADIIGANEDLNPVVERNALALVVR_x000B_DFCPLRAFCAYYSRVVWNLMIKADQPPANWMKSGVDENAKFAAFDFFHGILSPASLYVPLERHPTSAERI_x000B_ANQAMFAVKIANAPGNGTDLTMDHVAFTKGKITQPSGLRPTPFNT	ATGAGCTTTGACTACACACACCCTCTCTACCGCAGCTATCCATTTCCACACTACTGCGAG_x000B_TTCGACCGGCACCAACTCTGCGACCATCATCCAGTACTCAAACCTCCAACTCACAAACCC_x000B_AGTGCCCCGAACTCTCTCATGTCTACCGACGACAACAAGGGCAAACAACCACTTCACCCG_x000B_ACACCTTCGGGCCCTAACGACAAGACCCCAAAACCTACCCCCGTACTCACTCCCTCAGCT_x000B_ACGCCCACAGCTGCAGGTAAGGAAAACCAGGAGCCCATCGAAAAGCGTATCATACACGCT_x000B_TTCCACGCTGAAGCAAAAACCCACAACAATGGGGTCTCTCCACCTGCCTTTAACCCGAAC_x00…
ICRV	Pune	AY255008	AEK87110	Pune	coat protein_x000B_ICRSV-B	India: Pune		MSFDYTHPLYRSYPFPHYCEFDRHQLCDHHPVLKPPTHKPSAPNSLMSTDDNKGKQPLHPTPSGPNDKTP_x000B_KPTPVLTPSATPTAAGKENQEPIEKRIIHAFHAEAKTHNNGVSPPAFNPNNMNAVPLYLLNLNLRYSPVT_x000B_NSIANPKQTEAIGKAWVRILNIDPANVFLYAIDLARACADAGSSPEADIIGANEDLNPVVERNALALVVR_x000B_DFCPLRAFCAYYSRVVWNLMIKADQPPANWMKSGVDENAKFAAFDFFHGILSPASLYVPLERHPTSAERI_x000B_ANQAMFAVKIANAPGNGTDLTMDHVAFTKGKITQPSGLRPTPFNT	ATGAGCTTTGACTACACACACCCTCTCTACCGCAGCTATCCATTTCCACACTACTGCGAGTTCGACCGGCACCAACTCTGCGACCATCATCCAGTACTCAAACCTCCAACTCACAAACCCAGTGCCCCGAACTCTCTCATGTCTACCGACGACAACAAGGGCAAACAACCACTTCACCCGACACCTTCGGGCCCTAACGACAAGACCCCAAAACCTACCCCCGTACTCACTCCCTCAGCTACGCCCACAGCTGCAGGTAAGGAAAACCAGGAGCCCATCGAAAAGCGTATCATACACGCTTTCCACGCTGAAGCAAAAACCCACAACAATGGGGTCTCTCCACCTGCCTTTAACCCGAACAACATGAACGCTGTGCCGCTGTACCTGCTTAACCTCAAC…
CYVCV	ALI	KT696521	AOX15539		coat protein	India: Ahmedabad	lemon	MSFDYTHPLYRSYPFPHYCEFDRHQLCDHHPVLKPPTHKPSAPNSLMSTDDNKGKQPLHPTPSGPNDKTP_x000B_KPTPVLTPSATPTAAGKENQEPIEKRITHAFHAEAKTHNNGVSPPAFNPNNMNAVPLNLLNLNLRYSPVT_x000B_NSIANPKQTEAIGKAWVRILNIDPANVFLYAIDLARACADAGSSPEADIIGANEDLNPVVERNALALVVR_x000B_DFCPLRAFCAYYSRVVWNLMIKADQPPANWMKSGVDENAKFAAFDFFHGILLPASLYVPLERHPTSAERI_x000B_ANQAMFAVKIANAPGNGTDLTMDHVAFTKGKITQPSGLRPTPFNI	ATGAGCTTCGACTACACTCACCCTCTCTACCGCAGCTACCCATTTCCACACTACTGCGAGTTCGACCGGC_x000B_ATCAACTCTGCGACCATCATCCAGTACTCAAACCTCCAACTCACAAACCCAGTGCCCCGAACTCTCTCAT_x000B_GTCTACCGACGACAACAAGGGCAAACAACCACTTCACCCGACACCTTCGGGCCCTAACGACAAGACCCCA_x000B_AAACCTACCCCTGTACTCACTCCCTCAGCCACGCCCACAGCTGCAGGTAAGGAAAACCAGGAGCCCATCG_x000B_AAAAGCGTATCACACACGCTTTCCACGCTGAAGCAAAAACCCACAACAATGGGGTCTCTCCACCTGCCTT_x000B_TAACCCGAACAACA…
ICRV	GF-3	MN422619	QIU78631	ICRSV-PAU-GF-3	coat protein_x000B_ICRSV-B	India: Ludhiana, Punjab	Grapefruit	MSFDYTHPLYRSYPFPHYCEFDRHQLCDHHPVLKPPTHKPSAPNSLMSTDDNKGKQPLHPTPSGPNDKTP_x000B_KPIPVLTPSATPTAAGKENQEPIEKRIIHAFHAEAKTHNNGVSPPAFNPNNMNAVPLNLLNLNLRYSPVT_x000B_NSIANPKQTEAIGKAWVRILNIDPANVFLYAIDLARACADAGSSPEADIIGANEDLNPVVERNALALVVR_x000B_DFCPLRAFCAYYSRVVWNLMIKADQPPANWMKSGVDENAKFAAFDFFHGILSPASLYVPLERHPTSAERI_x000B_ANQAMFAVKIANAPGNGTDLTMDHVAFTKGRTTQSSGPRPTPFNI_x000B_	ATGAGCTTTGACTACACACACCCTCTCTACCGCAGCTATCCATTTCCACACTA_x000B_CTGCGAGTTCGACCGGCACCAACTCTGCGACCATCATCCAGTGCTCAAACCTCCAACTCACAAACCCAGT_x000B_GCCCCGAACTCTCTCATGTCTACCGACGACAACAAGGGCAAACAACCACTTCACCCGACACCTTCGGGCC_x000B_CTAACGACAAGACCCCGAAACCTATCCCCGTACTCACTCCCTCAGCTACGCCCACAGCCGCAGGTAAGGA_x000B_AAACCAAGAGCCCATCGAAAAGCGTATCATACACGCTTTCCACGCTGAAGCAAAAACCCACAACAATGGG_x000B_GTCTCTCCACCTGCCTTTAACCCGAACAATA…
CYVCV	Kin-Del	OR251443	WVH45233	Kin-Del	Coat Protein	India: IARI, New Delhi	Kinnow mandarin	MSFDYTHPLYRSYPFPHYCEFDRHQLCDHHPVLKPPTHKPSAPNSLMSTDDNKGKQPLHPTPSGPNDKTP_x000B_KPIPVLTPSATPTAAGKENQEPIEKRIIHAFHAEAKTHNNGVSPPAFNPNNMNAVPLNLLNLNLRYSPVT_x000B_NSIANPKQTEAIGKAWVRILNIDPANVFLYAIDLARACADAGSSPEADIIGANEDLNPVVERNALALVVR_x000B_DFCPLRAFCAYYSRVVWNLMIKADQPPANWMKSGVDENAKFAAFDFFHGILSPASLYVPLERHPTSAERI_x000B_ANQAMFAVKIANAPGNGTDLTMDHVAFTKGRTTQSSGPRPTPFNI	ATGAGCTTCGACTACACTCATCCTCTCTACCGCAGCTATCCATTTCCACACTACTGCGAGTTCGACCGGCACCAACTCTGCGACCATCATCCAGTGCTCAAACCTCCAACTCACAAACCCAGTGCCCCGAACTCTCTCATGTCTACCGACGACAACAAGGGCAAACAACCACTTCACCCGACACCTTCGGGCCCTAACGACAAGACCCCGAAACCTATCCCCGTACTCACTCCCTCAGCTACGCCCACAGCCGCAGGTAAGGAAAACCAAGAGCCCATCGAAAAGCGTATCATACACGCTTTCCACGCTGAAGCAAAAACCCACAACAATGGGGTCTCTCCACCTGCCTTTAACCCGAACAATATGAATGCTGTGCCGCTGAACCTGCTCAACCTCAAC…
ICRV	LUH-6	MW233693	UOF76649	P-G-LUH-6	coat protein_x000B_ICRSV-B	India: Ludhiana, Punjab	grape fruit	MSFDYTHPLYRSYPFPHYCEFDRHQLCDHHPVLKPPTHKPSAPNSLMSTDDNKGKQPLHPTPSGPNDKTP_x000B_KPIPVLTPSATPTAAGKENQEPIEKRIIHAFHAEAKTHNNGVSPPAFNPNNMNAVPLNLLNLNLRYSPVT_x000B_NSIANPKQTEAIGKAWVRILNIDPANVFLYAIDLARACADAGSSPEADIIGANEDLNPVVERNALALVVR_x000B_DFCPLRAFCAYYSRVVWNLMIKADQPPANWMKSGVDENAKFAAFDFFHGILSPASLYVPLERHPTSAERI_x000B_ANQAMFAVKIANAPGNGTDLTMDHVAFTKGRTTQSSGPRPTPFNI	ATGAGCTTTGACTACACACACCCTCTCTACCGCAGCTATCCATTTCCACACTACTGCGAGTTCGACCGGC_x000B_ACCAACTCTGCGACCATCATCCAGTGCTCAAACCTCCAACTCACAAACCCAGTGCCCCGAACTCTCTCAT_x000B_GTCTACCGACGACAACAAGGGCAAACAACCACTTCACCCGACACCTTCGGGCCCTAACGACAAGACCCCG_x000B_AAACCTATCCCCGTACTCACTCCCTCAGCTACGCCCACAGCCGCAGGTAAGGAAAACCAAGAGCCCATCG_x000B_AAAAGCGTATCATACACGCTTTCCACGCTGAAGCAAAAACCCACAACAATGGGGTCTCTCCACCTGCCTT_x000B_TAACCCGAACAATA…
CYVCV	PALI	KT696512	AOO32388		COAT PROTEIN	India, Ludhiana	sweet orange	MSFDYTHPLYRSYPFPHYCEFDRHQLCDHHPVLKPPTHKPSAPNSLMSTDDNKGKQPLHPTPSGPNDKTP_x000B_KPIPVLTPSATPTAAGKENQEPIEKRIIHAFHAEAKTHNNGVSPPAFNPNNMNAVPLNLLNLNLRYSPVT_x000B_NSIANPKQTEAIGKAWVRILNIDPANVFLYAIDLARACADAGSSPEADIIGANEDLNPVVERNALALVVR_x000B_DFCPLRAFCAYYSRVVWNLMIKADQPPANWMKSGVDENAKFAAFDFFHGILSPASLYVPLEGHPTSAERI_x000B_ANQAMFAVKIANAPGNGTDLTMDHVAFTKGRTTQSSGPRPTPFNI_x000B_	ATGAGCTTCGACTACACTCACCCTCTCTACCGCAGCTATCCATTTCCACACTACTGCGAGTTCGACCGGCACCAACTCTGCGACCATCATCCAGTGCTCAAACCTCCAACTCACAAACCCAGTGCCCCGAACTCTCTCATGTCTACCGACGACAACAAGGGCAAACAACCACTTCACCCGACACCTTCGGGCCCTAACGACAAGACCCCGAAACCTATCCCCGTACTCACTCCCTCAGCTACGCCCACAGCCGCAGGTAAGGAAAACCAAGAGCCCATCGAAAAGCGTATCATACACGCTTTCCACGCTGAAGCAAAAACCCACAACAATGGGGTCTCTCCACCTGCCTTTAACCCGAACAATATGAATGCTGTGCCGCTGAACCTGCTCAACCTCAAC…
ICRV	Mu-5	MN518763	QIU78635	ICRSV-Mu-5	coat protein_x000B_ICRSV-B	India:Sri Muktsar Sahib, Punjab	Kinnow	MSFDYTHPLYRSYPFPHYCEFDRHQLCDHHPVLKPPTHKPSAPNSLMSTDDNKGKQPLHPTPSGPNDTTP_x000B_KPIPVPTPSATPTVAGKENQEPIEKRIIHAFHAEAKTHNNGVSPPAFNPNNMNAVPLNLLNLNLRYSPVT_x000B_NSIANPKQTEAIGKAWVRILNIDPANVFLYAIDLARACADAGSSPEADIIGANEDLNPVVERNALALVVR_x000B_DFCPLRAFCAYYSRVVWNLMIKADQPPANWMKSGVDENAKFAAFDFFHGILSPASLYVPLERHPTSAERI_x000B_ANQAMFAVKIANAPGNGTDLTMDHVAFTKGKTTQHSGLRPTPFNI	ATGAGCTTTGACTACACACACCCTCTCTACCGCAGCTATCCATTTCCACACTACTGCGAGTTCGACCGGC_x000B_ACCAACTCTGCGACCATCATCCAGTACTCAAACCTCCAACTCACAAACCCAGTGCCCCGAACTCTCTCAT_x000B_GTCTACCGACGACAACAAGGGCAAACAACCACTTCACCCGACACCTTCGGGCCCTAACGACACGACCCCG_x000B_AAACCTATCCCCGTACCCACTCCCTCAGCTACGCCCACAGTTGCAGGTAAGGAAAACCAAGAGCCCATCG_x000B_AAAAGCGTATCATACACGCTTTCCACGCTGAAGCAAAAACTCACAACAATGGGGTCTCTCCACCTGCCTT_x000B_TAACCCGAACAATA…
ICRV	LUH-1	MW233703	UOF76659	P-K-LUH-1	coat protein_x000B_ICRSV-B	India: Ludhiana, Punjab	Kinnow	MSFDYTHPLYRSYPFPHYWEFDRHQLCDHHPVVKPPIHKPSAPNSFMSTDDNKGKQPLHPTPSGPNDKTP_x000B_KPIPVLTPSATPTAAGKENQEPIEKRIIHAFHAEAKTHNNGVSPPAFNPNNMNAVPLNLLNLNLRYSPVT_x000B_NSIANPKQTEAIGKAWVRILNIDPANVFLYAIDLARACADAGSSPEADIIGANEDLNPVVERNALALVVR_x000B_DFCPLRAFCAYYSRVVWNLMIKADQPPANWMKSGVDENAKFAAFDFFHGILSPASLYVPLERHPTSAERI_x000B_ANQAMFAVKIANAPGNGTDLTMDHVAFTKGRTTQSSGPRPTPFNI	ATGAGCTTTGACTACACACACCCTCTCTACCGCAGCTATCCATTTCCACACTACTGGGAGTTCGACCGGC_x000B_ACCAACTTTGCGACCATCATCCAGTGGTCAAACCTCCAATTCACAAACCCAGTGCCCCGAACTCTTTCAT_x000B_GTCTACCGACGACAACAAGGGCAAACAACCACTTCACCCGACACCTTCGGGCCCTAACGACAAGACCCCG_x000B_AAACCTATCCCCGTACTCACTCCCTCAGCTACGCCCACAGCCGCAGGTAAGGAAAACCAAGAGCCCATCG_x000B_AAAAGCGTATCATACACGCTTTCCACGCTGAAGCAAAAACCCACAACAATGGGGTCTCTCCACCTGCCTT_x000B_TAACCCGAACAATA…
ICRV	MUK-35	MW233697	UOF76653	P-K-MUK-35	coat protein_x000B_ICRSV-B	India: Sri Muktsar Sahib, punjab	Kinnow	MSFDYTHPLYRSYPFPHYCEFDRHQLCDHHPVLKPPTHKPSAPNSLMSTDDNKGKQPLHPTPSGPNDTTP_x000B_KPIPVPTPSATPTVAGKENQEPIEKRIIHAFHAEAKTHNNGVSPPAFNPNNMNAVPLNLLNLNLRYSPVT_x000B_NSIANPKQTEAIGKAWVRILNIDPANVFLYAIDLARACADAGSSPEADIIGANEDLNPVVERNALALVVR_x000B_DFCPLRAFCAYYSRVVWNLMIKADQPPANWMKSGVDENAKFAAFDFFHGILSPASLYVPLERHPTSAERI_x000B_ANQAMFAVKIANAPGNGTDLTMDHVAFTKGKTTQHSGLRPTPFNI	ATGAGCTTTGACTACACACACCCTCTCTACCGCAGCTATCCATTTCCACACTACTGCGAGTTCGACCGGC_x000B_ACCAACTCTGCGACCATCATCCAGTACTCAAACCTCCAACTCACAAACCCAGTGCCCCGAACTCTCTCAT_x000B_GTCTACCGACGACAACAAGGGCAAACAACCACTTCACCCGACACCTTCGGGCCCTAACGACACGACCCCG_x000B_AAACCTATCCCCGTACCCACTCCCTCAGCTACGCCCACAGTTGCAGGTAAGGAAAACCAAGAGCCCATCG_x000B_AAAAGCGTATCATACACGCTTTCCACGCTGAAGCAAAAACTCACAACAATGGGGTCTCTCCACCTGCCTT_x000B_TAACCCGAACAATA…
CYVCV	LKI	KT696515	AOX15533		coat protein	India: Ludhiana	Kinnow	MSFDYTHPLYRSYPFPHYCEFDRHQLCDHHPVLKPPTHKPSAPNSLMSTDDNKGKQPLHPTPSGPNDKTP_x000B_KPIPVLTPSATPTAAGKENQEPIEKRIIHAFHAEAKTHNNGASPPAFNPNNMNAVPLNLLNLNLRYSPVT_x000B_NSIANPKQTEAIGKAWVRILNIDPANVFLYAIDLARACADAGSSPEADIIGANEDLNPVVERNALALVVR_x000B_DFCPLRAFCAYYSRVVWNLMIKADQPPANWMKSGVDENAKFAAFDFFHGILSPASLYVPLERHPTSAERI_x000B_ANQAMFAVKIANAPGNGTDLTMDHVALTKRRTTQSSGPRPTPFNI	ATGAGCTTCGACTACACTCACCCTCTCTACCGCAGCTATCCATTTCCACACTACTGCGAGTTCGACCGGC_x000B_ACCAACTCTGCGACCATCATCCAGTGCTCAAACCTCCAACTCACAAACCCAGTGCCCCGAACTCTCTCAT_x000B_GTCTACCGACGACAACAAGGGCAAACAACCACTTCACCCGACACCTTCGGGCCCTAACGACAAGACCCCG_x000B_AAACCTATCCCCGTACTCACTCCCTCAGCTACGCCCACAGCCGCAGGTAAGGAAAACCAAGAGCCCATCG_x000B_AAAAGCGTATCATACACGCTTTCCACGCTGAAGCAAAAACCCACAACAATGGGGCCTCTCCACCTGCCTT_x000B_TAACCCGAACAATA…
ICRV	Mu-4	MN518762	QIU78634	ICRSV-Mu-4	coat protein_x000B_ICRSV-B	India: Sri Muktsar Sahib, punjab	Kinnow	MSFDYTHPLYRSYPFPHYCEFDRHQLCDHHPVLKPPTHKSSAPSSLMSTNDNKGKQPLHPTPSGPNDTTP_x000B_KPIPAPTPSGTPTVAGKENQEAIEKRIIHAFHAEAKTHNNGVSPPAFNPNNMNAVPLNLLNLNLRYSPVT_x000B_NSIANPKQTEAIGKAWVRILNIDPANVFLYAIDLARACADAGSSPEADIIGANEDLNPVVERNALALVVR_x000B_DFCPLRAFCAYYSRVVWNLMIKADQPPANWMKSGVDENAKFAAFDFFHGILSPASLYVPLERHPTSAERI_x000B_ANQAMFAVKIANAPGNGTDLTMDHVAFTKGRTTQHSGLRPTPFNI	ATGAGCTTTGACTACACACACCCTCTCTACCGCAGCTATCCATTTCCACACTACTGCGAGTTCGACCGGC_x000B_ACCAACTCTGCGACCATCATCCAGTACTCAAACCTCCAACTCACAAATCCAGTGCCCCGAGCTCTCTCAT_x000B_GTCTACCAACGACAACAAGGGCAAACAACCACTTCACCCGACACCTTCGGGCCCTAACGACACGACCCCA_x000B_AAACCTATCCCTGCACCCACTCCCTCAGGTACGCCCACAGTTGCAGGTAAGGAAAACCAAGAGGCCATCG_x000B_AAAAGCGTATCATACACGCTTTCCACGCTGAAGCAAAAACCCACAACAATGGGGTCTCTCCACCTGCCTT_x000B_TAACCCGAACAATA…
CYVCV	JX	KX378154	AOX49234		coat protein	China: Jiangxi	satsuma mandarin	MSFDYTHPLYRSYPFPHYCEFDRHQLCDHHPILKPPTHKPSAPNSLMSTDDNKGKQPLHPTPSGPNDTTP_x000B_KPIPVPTPSATPTAAGKENQEPIEKRITHAFHAEAKTHNNGVSPPAFNPNNMNAVPLNLLNLNLRYSPVT_x000B_NSIANPKQTEAIGKAWVRILNIDPANVFLYAIDLARACADAGSSPEADIIGANEDLNPVVERNALALVVR_x000B_NFCPLRAFCAYYSRVVWNLMIKADQPPANWMKSGVDENAKFAAFDFFHGILSPASLYVPLERHPTSAERI_x000B_ANQAMFAVKIANAPGNGTDLTMDHVAFTKGRTTQHSGLRPTPFNI	ATGAGCTTCGACTACACTCACCCTCTCTACCGCAGCTATCCATTTCCACACTACTGCGAGTTCGACCGGCACCAACTCTGCGACCATCATCCAATACTCAAACCTCCAACTCACAAACCCAGCGCCCCGAACTCTCTCATGTCTACCGACGACAACAAGGGCAAACAACCACTTCACCCGACACCTTCGGGCCCTAACGACACGACCCCGAAACCTATCCCCGTACCCACTCCCTCAGCTACGCCCACAGCTGCAGGTAAGGAAAACCAAGAGCCCATCGAAAAGCGTATCACACACGCTTTCCACGCTGAAGCAAAAACCCACAACAATGGGGTCTCTCCACCTGCCTTTAACCCGAACAACATGAATGCTGTGCCGCTGAACCTGCTCAACCTCAAC…
ICRV	MUK-34	MW233696	QIU78634	P-K-MUK-34	coat protein_x000B_ICRSV-B	India: Sri Muktsar Sahib, punjab	Kinnow	MSFDYTHPLYRSYPFPHYCEFDRHQLCDHHPVLKPPTHKSSAPSSLMSTNDNKGKQPLHPTPSGPNDTTP_x000B_KPIPAPTPSGTPTVAGKENQEAIEKRIIHAFHAEAKTHNNGVSPPAFNPNNMNAVPLNLLNLNLRYSPVT_x000B_NSIANPKQTEAIGKAWVRILNIDPANVFLYAIDLARACADAGSSPEADIIGANEDLNPVVERNALALVVR_x000B_DFCPLRAFCAYYSRVVWNLMIKADQPPANWMKSGVDENAKFAAFDFFHGILSPASLYVPLERHPTSAERI_x000B_ANQAMFAVKIANAPGNGTDLTMDHVAFTKGRTTQHSGLRPTPFNI	ATGAGCTTTGACTACACACACCCTCTCTACCGCAGCTATCCATTTCCACACTACTGCGAGTTCGACCGGC_x000B_ACCAACTCTGCGACCATCATCCAGTACTCAAACCTCCAACTCACAAATCCAGTGCCCCGAGCTCTCTCAT_x000B_GTCTACCAACGACAACAAGGGCAAACAACCACTTCACCCGACACCTTCGGGCCCTAACGACACGACCCCA_x000B_AAACCTATCCCTGCACCCACTCCCTCAGGTACGCCCACAGTTGCAGGTAAGGAAAACCAAGAGGCCATCG_x000B_AAAAGCGTATCATACACGCTTTCCACGCTGAAGCAAAAACCCACAACAATGGGGTCTCTCCACCTGCCTT_x000B_TAACCCGAACAATA…
CYVCV	GX-STJ	KX156742	ASK39484		coat protein	China	tangerine	MSFDYTHPLYRSYPFPHYCEFDRHQLCDHHPVLKPPTHKPSAPNSLMSTDDNKGKQPLHPTPSGPNDTTP_x000B_KPIPVPTPSVTPTAAGKENQEPIEKRITHAFHAEAKTHNNGVSPPAFNPNNMNAVPLNLLNLNLRYSPVT_x000B_NSIANPKQTEAIGKAWVRILNIDPANVFLYAIDLARACADAGSSPEADIIGANEDLNPVVERNALALVVR_x000B_DFCPLRAFCAYYSRVVWNLMIKADQPPANWMKSGVDENAKFAAFDFFHGILSPASLYVPLERHPTSAERI_x000B_ANQAMFAVKIANAPGNGTDLTMDHVAFTKGRTTQHSGLRPTPFNI	ATGAGCTTCGACTACACTCACCCTCTCTACCGCAGCTATCCATTTCCACACTACTGCGAG_x000B_TTCGACCGGCACCAACTCTGCGACCATCATCCAGTACTCAAACCTCCAACTCACAAACCC_x000B_AGCGCCCCGAACTCTCTCATGTCTACCGACGACAACAAGGGCAAACAACCACTTCACCCG_x000B_ACACCTTCGGGCCCTAACGACACGACCCCGAAACCTATCCCTGTACCCACTCCCTCAGTT_x000B_ACGCCCACAGCTGCAGGTAAGGAAAACCAAGAGCCCATCGAAAAGCGTATCACACACGCT_x000B_TTCCACGCTGAAGCAAAAACCCACAACAATGGGGTCTCTCCACCTGCCTTTAACCCGAAC_x00…
ICRV	ABH-22	MZ803193	USU43565	P-P-ABH-22	coat protein_x000B_ICRSV-B	India	Citrus reticulata	MSFDYTHPLYRSYPFPHYCEFDRHQLCDHHPVLKPPTHKPSAPNSLMSTNDNKGKQPLHPTPSGPNDTTP_x000B_KPIPAPTPSATPTAAGKENQEPIEKRIIHAFHAEAKTHNNGVSPPAFNPNNMNAVPLNLLNLNLRYSPVT_x000B_NSIANPKQTEAIGKAWVRILNIDPANVFLYAIDLARACADAGSSPEADIIGANEDLNPVVERNALALVVR_x000B_DFCPLRAFCAYYSRVVWNLMIKADQPPANWMKSGVDENAKFAAFDFFHGILSPASLYVPLERHPTSAERI_x000B_ANQAMFAVKIANAPGNGTDLTMDHVAFTKGRTTQPSGLRPTPFNI_x000B_	ATGAGCTTTGACTACACACACCCTCTCTACCGCAGCTATCCATTTCCACACTACTGCGAGTTCGACCGGC_x000B_ACCAACTCTGTGACCATCATCCAGTACTCAAACCTCCAACTCACAAACCCAGTGCCCCGAACTCTCTCAT_x000B_GTCTACCAACGACAACAAGGGCAAACAACCACTTCACCCGACACCTTCGGGCCCTAACGACACGACCCCG_x000B_AAACCTATCCCTGCACCCACTCCCTCAGCTACGCCCACAGCTGCAGGTAAGGAAAACCAAGAGCCCATCG_x000B_AAAAGCGCATCATACACGCTTTCCACGCTGAAGCAAAGACCCACAACAATGGGGTCTCTCCACCTGCCTT_x000B_TAACCCGAACAATA…
ICRV	ABH-17	MW233702	UOF76658	P-K-ABH-17	coat protein_x000B_ICRSV-B	India: Abohar, Punjab	kinnow	MSFDYTHPLYRSYPFPHYCEFDRHQLCDHHPVLKPPTHKPSAPNSLMSTNDNKGKQPLHPTPSGPNDTTP_x000B_KPIPAPTPSATPTAAGKENQEPIEKRIIHAFHAEAKTHNNGVSPPAFNPNNMNAVPLNLLNLNLRYSPVT_x000B_NSIANPKQTEAIGKAWVRILNIDPANVFLYAIDLARACADAGSSPEADIIGANEDLNPVVERNALALVVR_x000B_DFCPLRAFCAYYSRVVWNLMIKADQPPANWMKSGVDENAKFAAFDFFHGILSPASLYVPLERHPTSAERI_x000B_ANQAMFAVKIANAPGNGTDLTMDHVAFTKGRTTQPSGLRPTPFNI_x000B_	ATGAGCTTTGACTACACACACCCTCTCTACCGCAGCTATCCATTTCCACACTACTGCGAGTTCGACCGGC_x000B_ACCAACTCTGTGACCATCATCCAGTACTCAAACCTCCAACTCACAAACCCAGTGCCCCGAACTCTCTCAT_x000B_GTCTACCAACGACAACAAGGGCAAACAACCACTTCACCCGACACCTTCGGGCCCTAACGACACGACCCCG_x000B_AAACCTATCCCTGCACCCACTCCCTCAGCTACGCCCACAGCTGCAGGTAAGGAAAACCAAGAGCCCATCG_x000B_AAAAGCGCATCATACACGCTTTCCACGCTGAAGCAAAGACCCACAACAATGGGGTCTCTCCACCTGCCTT_x000B_TAACCCGAACAATA…
CYVCV	HP-MRJ	MK415926	QIN54970	HP-MRJ	COAT PROTEIN	China: Yunnan	Asumi	MSFDYTHPLYRSYPFPHYCEFDRHQLCDHHPVLKPPTHKPSAPNSLMSTNDNKGKQPLHPTPSGPNDTTP_x000B_KPIPVPTPSVTPTAAGKENQEPIEKRITHAFHAEAKTHNNGVSPPAFNPNNMNAVPLNLLNLNLRYSPVT_x000B_NSIANPKQTEAIGKAWVRILNIDPANVFLYAIDLARACADAGSSPEADIIGANEDLNPVVERNALALVVR_x000B_DFCPLRAFCAYYSRVVWNLMVKADQPPANWMKSGVDENAKFAAFDFFHGILSPASLYVPLERHPTSAERI_x000B_ANQAMFAVKIANAPGNGTDLTMDHVAFTKGRTTQHSGLRPTPFNI_x000B_	ATGAGCTTCGACTACACTCACCCTCTCTACCGCAGCTATCCATTTCCACACTACTGCGAG_x000B_TTCGACCGGCACCAACTCTGCGACCATCATCCAGTACTCAAACCTCCAACTCACAAACCC_x000B_AGCGCCCCGAACTCTCTCATGTCTACCAACGACAACAAGGGCAAACAACCACTTCACCCG_x000B_ACACCTTCGGGCCCTAACGACACGACCCCGAAACCTATCCCCGTACCCACTCCCTCAGTT_x000B_ACGCCCACAGCTGCAGGTAAGGAAAACCAAGAGCCCATCGAAAAGCGTATCACACACGCT_x000B_TTCCACGCTGAAGCAAAAACCCACAACAATGGGGTCTCTCCACCTGCCTTTAACCCGAAC_x00…
CYVCV	YN-EL	KX156751	ASK39538	YN-EL	COAT PROTEIN	China	lemon	MSFDYTHPLYRSYPFPHYCEFDRHQLCDHHPVLKPPTHKPSAPNSLMSTDDNKGKQPLHPTPSGPNDTTP_x000B_KPIPVPTPSVTPTAAGKENQEPIEKRITHAFHAEAKTHNNGVSPPAFNPNNMNAVPLNLLNLNLRYSPVT_x000B_NSIANPKQTEAIGKAWVRILNIDPANVFLYAIDLARACADAGSSPEADIIGANEDLNPVVERNALALVVR_x000B_DFCPLRAFCAYYSRVVWNLMIKADQPPANWMKSGVDENAKFAAFDFFHGILSPASLYVPLERHPTSAERI_x000B_ANQAMFAVKIANAPGNGTDLTMDHVAFTKGRTTQHSGLRPTPFNI	ATGAGCTTCGACTACACTCACCCTCTTTACCGCAGCTATCCATTTCCACACTACTGCGAG_x000B_TTCGACCGGCACCAACTCTGCGACCATCATCCAGTACTCAAACCTCCAACTCACAAACCC_x000B_AGCGCCCCGAACTCTCTCATGTCTACCGACGACAACAAGGGCAAACAACCACTTCACCCG_x000B_ACACCTTCGGGCCCTAACGACACGACCCCGAAACCTATCCCTGTACCCACTCCCTCAGTT_x000B_ACGCCCACAGCTGCAGGTAAGGAAAACCAAGAGCCCATCGAAAAGCGTATCACACACGCT_x000B_TTCCACGCTGAAGCAAAAACCCACAACAATGGGGTCTCTCCACCTGCCTTTAACCCGAAC_x00…
CYVCV	YN-BTC	KX156750	ASK39532	YN-BTC	COAT PROTEIN	China	sweet orange	MSFDYTHPLYRSYPFPHYCEFDRHQLCDHHPVLKPPTHKPSAPNSLMSTDDNKGKQPLHPTPSGPNDTTP_x000B_KPIPVPTPSVTPTAAGKENQEPIEKRITHAFHAEAKTHNNGVSPPAFNPNNMNAVPLNLLNLNLRYSPVT_x000B_NSIANPKQTEAIGKAWVRILNIDPANVFLYAIDLARACADAGSSPEADIIGANEDLNPVVERNALALVVR_x000B_DFCPLRAFCAYYSRVVWNLMIKADQPPANWMKSGVDENAKFAAFDFFHGILSPASLYVPLERHPTSAERI_x000B_ANQAMFAVKIANAPGNGTDLTMDHVAFTKGRTTQHSGLRPTPFNI	ATGAGCTTCGACTACACTCACCCTCTCTACCGCAGCTATCCATTTCCACACTACTGCGAG_x000B_TTCGACCGGCACCAACTCTGCGACCATCATCCAGTACTCAAACCTCCAACTCACAAACCC_x000B_AGCGCCCCAAACTCTCTCATGTCTACCGACGACAACAAGGGCAAACAACCACTTCACCCG_x000B_ACACCTTCGGGCCCTAACGACACGACCCCGAAACCTATCCCTGTACCCACTCCCTCAGTT_x000B_ACGCCCACAGCTGCAGGTAAGGAAAACCAAGAGCCCATCGAAAAGCGTATCACACACGCT_x000B_TTCCACGCTGAAGCAAAAACCCACAACAATGGGGTCTCTCCACCTGCCTTTAACCCGAAC_x00…
ICRV	LUH-9	MZ803192	USU43564	P-P-LUH-9	coat protein_x000B_ICRSV-B	India	Citrus maxima	MSFDYTHPLYRSYPFPHYCEFDRHQLCDHHPVLKPPTHKPSAPNSLMSTNDDKGKQPLHPTPSGPNDTTP_x000B_KSIPAPSHSATATAAGKENQEPIEKRIIHAFHAEAKTHNNGVSPPAFNPNNMNAVPLNLLNLNLRYSPVT_x000B_NSIANPKQTEAIGKAWVRILNIDPANVFLYAIDLARACADAGSSPEADIIGANEDLNPVVERNALALVVR_x000B_DFCPLRAFCAYYSRVVWNLMIKADQPPANWMKSGVDENAKFAAFDFFHGILSPASLYVPLERHPTSAERI_x000B_ANQAMFAVKIANAPGNGTDLTMDHVAFTKGRTTQHSGLRPTP	ATGAGCTTTGACTACACACACCCTCTCTACCGCAGCTATCCATTTCCACACTACTGCGAGTTCGACCGGC_x000B_ACCAACTCTGCGACCATCATCCAGTACTCAAACCTCCAACTCACAAACCCAGCGCCCCGAACTCTCTCAT_x000B_GTCTACCAACGACGACAAGGGCAAACAACCACTTCACCCGACACCTTCGGGCCCTAACGACACGACCCCG_x000B_AAATCTATCCCTGCACCCTCTCACTCAGCGACTGCGACAGCTGCAGGTAAGGAAAACCAAGAGCCCATCG_x000B_AAAAGCGCATCATACACGCTTTCCACGCTGAAGCAAAAACCCACAATAATGGGGTCTCCCCACCTGCCTT_x000B_TAACCCGAACAATA…
ICRV	LUH-8	MW233694	UOF76650	P-P-LUH-8	coat protein_x000B_ICRSV-B	India: Ludhiana, Punjab	pomelo	MSFDYTHPLYRSYPFPHYCEFDRHQLCDHHPVLKPPTHKPSAPNSLMSTNDDKGKQPLHPTPSGPNDTTP_x000B_KSIPAPSHSATATAAGKENQEPIEKRIIHAFHAEAKTHNNGVSPPAFNPNNMNAVPLNLLNLNLRYSPVT_x000B_NSIANPKQTEAIGKAWVRILNIDPANVFLYAIDLARACADAGSSPEADIIGANEDLNPVVERNALALVVR_x000B_DFCPLRAFCAYYSRVVWNLMIKADQPPANWMKSGVDENAKFAAFDFFHGILSPASLYVPLERHPTSAERI_x000B_ANQAMFAVKIANAPGNGTDLTMDHVAFTKGRTTQHSGLRPTPFSI	ATGAGCTTTGACTACACACACCCTCTCTACCGCAGCTATCCATTTCCACACTACTGCGAGTTCGACCGGC_x000B_ACCAACTCTGCGACCATCATCCAGTACTCAAACCTCCAACTCACAAACCCAGCGCCCCGAACTCTCTCAT_x000B_GTCTACCAACGACGACAAGGGCAAACAACCACTTCACCCGACACCTTCGGGCCCTAACGACACGACCCCG_x000B_AAATCTATCCCTGCACCCTCTCACTCAGCGACTGCGACAGCTGCAGGTAAGGAAAACCAAGAGCCCATCG_x000B_AAAAGCGCATCATACACGCTTTCCACGCTGAAGCAAAAACCCACAATAATGGGGTCTCCCCACCTGCCTT_x000B_TAACCCGAACAATA…
ICRV	PAU-Pomelo	MN518760	QIU78632	ICRSV PAU-Pomelo	coat protein_x000B_ICRSV-B	India:Ludhiana, Punjab	Citrus maxima (Pomelo)	MSFDYTHPLYRSYPFPHYCEFDRHQLCDHHPVLKPPTHKPSAPNSLMSTNDDKGKQPLHPTPSGPNDTTP_x000B_KSIPAPSHSATATAAGKENQEPIEKRIIHAFHAEAKTHNNGVSPPAFNPNNMNAVPLNLLNLNLRYSPVT_x000B_NSIANPKQTEAIGKAWVRILNIDPANVFLYAIDLARACADAGSSPEADIIGANEDLNPVVERNALALVVR_x000B_DFCPLRAFCAYYSRVVWNLMIKADQPPANWMKSGVDENAKFAAFDFFHGILSPASLYVPLERHPTSAERI_x000B_ANQAMFAVKIANAPGNGTDLTMDHVAFTKGRTTQHSGLRPTPFSI	ATGAGCTTTGACTACACACACCCTCTCTACCGCAGCTATCCATTTCCACACTACTGCGAGTTCGACCGGC_x000B_ACCAACTCTGCGACCATCATCCAGTACTCAAACCTCCAACTCACAAACCCAGCGCCCCGAACTCTCTCAT_x000B_GTCTACCAACGACGACAAGGGCAAACAACCACTTCACCCGACACCTTCGGGCCCTAACGACACGACCCCG_x000B_AAATCTATCCCTGCACCCTCTCACTCAGCGACTGCGACAGCTGCAGGTAAGGAAAACCAAGAGCCCATCG_x000B_AAAAGCGCATCATACACGCTTTCCACGCTGAAGCAAAAACCCACAATAATGGGGTCTCCCCACCTGCCTT_x000B_TAACCCGAACAATA…
CYVCV	AEI	KT696514	AOX15532	AEI	COAT PROTEIN	India: Abohar	etrog citron	MSFDYTHPLYRSYPFPHYCEFDRHQLCDHHPVLKPPTHKPSAPNSLMSTNDNKGKQPLHPTPPGPNDTTP_x000B_KPIPAPTPPAAHTAAGKENQEPIEKRITHAFHAEAKTHNNGVSPPAFNPNNMNAVPLNLLNLNLRYSPVT_x000B_NSIANPKQTEAIGKAWVRILNIDPANVFLYAIDLARACADAGSSPEADIIGANEDLNPVVERNALALVVR_x000B_DFCPLRAFCAYYSRVVWNLMIKADQPPANWMKSGVDENAKFAAFDFFHGILSPASLYVPLERHPTSAERI_x000B_ANQAMFAVKIANAPGNGTDLTMDHVAFTKGRTTQHSGLRPTPFNI	ATGAGCTTCGACTACACTCACCCTCTCTACCGCAGCTATCCATTTCCACACTACTGCGAGTTCGACCGGC_x000B_ACCAGCTCTGCGACCATCATCCAGTACTCAAACCTCCAACTCACAAACCCAGTGCCCCGAACTCTCTCAT_x000B_GTCTACCAACGACAACAAGGGCAAACAACCACTTCACCCGACACCTCCGGGCCCTAACGACACGACCCCG_x000B_AAACCTATCCCTGCACCCACTCCCCCAGCTGCGCACACAGCTGCAGGTAAGGAAAACCAAGAGCCCATCG_x000B_AAAAGCGCATCACACACGCTTTCCACGCTGAAGCAAAAACCCACAACAATGGGGTCTCTCCACCTGCCTT_x000B_TAACCCGAACAATA…
ICRV	Bh-2	MN518761	QIU78633	ICRSV-Bh-2	coat protein_x000B_ICRSV-B	India:Ludhiana, Punjab	kinnow	MSFDYTHPLYRSYPFPHYCEFDRHQLCDHHPALKPPTHKPSAPNSHMSTNDDKGKQPLHPTPSGPNDTTP_x000B_KPIPVPTPSATPTAAGKENQEPTEKRIIHAFHAEAKTHNNGVSPPAFNPNNMNAVPLNLLNLNLRYSPVT_x000B_NSIANPKQTEAIGKAWVRILNIDPANVFLYAIDLARACADAGSSPEADIIGANEDLNPVVERNALALVVR_x000B_DFCPLRAFCAYYSRVVWNLMIKADQPPANWMKSGVDENAKFAAFDFFHGILSPASLYVPLERHPTSAERI_x000B_ANQAMFAVKIANAPGNGTDLTMDHVAFTKGRTTQSSGLRPTPFNI	ATGAGCTTTGACTACACACACCCTCTCTACCGCAGCTATCCATTTCCACACTACTGCGAGTTCGACCGGC_x000B_ACCAACTCTGCGACCATCATCCAGCACTCAAACCTCCAACTCACAAACCCAGTGCCCCGAACTCTCACAT_x000B_GTCTACCAACGACGACAAGGGCAAACAACCACTTCACCCGACACCTTCGGGCCCTAACGACACGACCCCG_x000B_AAACCTATCCCTGTACCCACTCCCTCAGCTACGCCGACAGCTGCAGGTAAGGAAAACCAAGAGCCCACCG_x000B_AAAAGCGTATCATACACGCTTTCCACGCTGAAGCCAAAACCCACAACAATGGGGTCTCCCCACCTGCCTT_x000B_TAACCCGAACAATA…
ICRV	BTI-38	MW233695	UOF76651	P-K-BTI-38	coat protein_x000B_ICRSV-B	India: Bathinda, Punjab	kinnow	MSFDYTHPLYRSYPFPHYCEFDRHQLCDHHPALKPPTHKPSAPNSHMSTNDDKGKQPLHPTPSGPNDTTP_x000B_KPIPVPTPSATPTAAGKENQEPTEKRIIHAFHAEAKTHNNGVSPPAFNPNNMNAVPLNLLNLNLRYSPVT_x000B_NSIANPKQTEAIGKAWVRILNIDPANVFLYAIDLARACADAGSSPEADIIGANEDLNPVVERNALALVVR_x000B_DFCPLRAFCAYYSRVVWNLMIKADQPPANWMKSGVDENAKFAAFDFFHGILSPASLYVPLERHPTSAERI_x000B_ANQAMFAVKIANAPGNGTDLTMDHVAFTKGRTTQSSGLRPTPFNI	ATGAGCTTTGACTACACACACCCTCTCTACCGCAGCTATCCATTTCCACACTACTGCGAGTTCGACCGGC_x000B_ACCAACTCTGCGACCATCATCCAGCACTCAAACCTCCAACTCACAAACCCAGTGCCCCGAACTCTCACAT_x000B_GTCTACCAACGACGACAAGGGCAAACAACCACTTCACCCGACACCTTCGGGCCCTAACGACACGACCCCG_x000B_AAACCTATCCCTGTACCCACTCCCTCAGCTACGCCGACAGCTGCAGGTAAGGAAAACCAAGAGCCCACCG_x000B_AAAAGCGTATCATACACGCTTTCCACGCTGAAGCCAAAACCCACAACAATGGGGTCTCCCCACCTGCCTT_x000B_TAACCCGAACAATA…
CYVCV	YN-KPJ	MK415923	QIN54952	YN-KPJ	COAT PROTEIN	China: Yunnan	Satsuma	MSFDYTHPLYRSYPFPHYCEFDRHQLCDHHPVLKPPTHKPSAPNSLMSTNDNKGKEPLHPTPSGPNDTTP_x000B_KPIPAPTPSVTPTAAGKENQEPIEKRITHAFHAEAKTHNNGVSPPAFNPNNMNAVPLNLLNLNLRYSPVT_x000B_NSIANPKQTEAIGKAWVRILNIDPANVFLYAIDLARACADAGSSPEADIIGANEDLNPVVERNALALVVR_x000B_DFCPLRAFCAYYSRVVWNLMIKADQPPANWMKSGVDENAKFAAFDFFHGILSPASLYVPLERHPTSAERI_x000B_ANQAMFAVKIANAPGNGTDLTMDHVAFTKGRTTQHSGLRPTPFNI	ATGAGCTTCGACTACACTCACCCTCTCTACCGCAGCTATCCATTTCCACACTACTGCGAG_x000B_TTCGACCGGCACCAACTCTGCGACCATCATCCAGTACTCAAACCTCCAACTCACAAACCC_x000B_AGCGCCCCGAACTCTCTCATGTCTACCAACGACAACAAGGGCAAAGAACCACTTCACCCG_x000B_ACACCTTCGGGCCCTAACGACACGACCCCGAAACCTATCCCCGCACCCACTCCCTCAGTT_x000B_ACGCCCACAGCTGCAGGTAAGGAAAACCAAGAGCCCATCGAAAAGCGTATCACACACGCT_x000B_TTCCACGCTGAAGCAAAAACCCACAACAATGGGGTCTCTCCACCTGCCTTTAACCCGAAC_x00…
CYVCV	CQ-PO	KX156735	ASK39442		COAT PROTEIN	China	zaoyangxiaoyezhi (Trifoliate)	MSFDYTHPLYRSYPFPHYCEFDRHQLCDHHPVLKPPTHKPSAPNSLMSTNDNKGKQPLHPTPSGPNDTTP_x000B_KPIPVPTPSVTPTAAGKENQEPIEKRITHAFHAEAKTHNNGVSPPAFNPNNMNAVPLNLLNLNLRYSPVT_x000B_NSIANPKQTEAIGKAWVRILNIDPANVFLYAIDLARACADAGSSPEADIIGANEDLNPVVERNALALVVR_x000B_DFCPLRAFCAYYSRVVWNLMIKADQPPANWMKSGVDENAKFAAFDFFHGILSPASLYVPLERHPTSAERI_x000B_ANQAMFAVKIANAPGNGTDLTMDHVAFTKGRTTQHSGLRPTPFNI	ATGAGCTTCGACTACACTCACCCTCTTTACCGCAGCTATCCATTTCCACACTACTGCGAG_x000B_TTCGACCGGCACCAACTCTGCGACCATCATCCAGTACTCAAACCTCCAACTCACAAACCC_x000B_AGCGCCCCGAACTCTCTCATGTCTACCAACGACAACAAGGGCAAACAACCACTTCACCCG_x000B_ACACCTTCGGGCCCTAACGACACGACCCCGAAACCTATCCCTGTACCCACTCCCTCAGTT_x000B_ACGCCCACAGCTGCAGGTAAGGAAAACCAAGAGCCCATCGAAAAGCGTATCACACACGCT_x000B_TTCCACGCTGAAGCAAAAACCCACAACAATGGGGTCTCTCCACCTGCCTTTAACCCGAAC_x00…
CYVCV	HN-GXP	KX156744	ASK39496	HN-GXP	COAT PROTEIN	China	pummelo	MSFDYTHPLYRSYPFPHYCEFDRHQLCDHHPVLKPPTHKPSAPNSLMSTNDNKGKQPLHPTPSGPNDTTP_x000B_KPIPVPTPSVTPTAAGKENQEPIEKRITHAFHAEAKTHNNGVSPPAFNPNNMNAVPLNLLNLNLRYSPVT_x000B_NSIANPKQTEAIGKAWVRILNIDPANVFLYAIDLARACADAGSSPEADIIGANEDLNPVVERNALALVVR_x000B_DFCPLRAFCAYYSRVVWNLMIKADQPPANWMKSGVDENAKFAAFDFFHGILSPASLYVPLERHPTSAERI_x000B_ANQAMFAVKIANAPGNGTDLTMDHVAFTKGRTTQHSGLRPTPFNI_x000B_	ATGAGCTTCGACTACACTCACCCTCTCTACCGCAGCTATCCATTTCCACACTACTGCGAG_x000B_TTCGACCGGCACCAACTCTGCGACCATCATCCAGTACTCAAACCTCCAACTCACAAACCC_x000B_AGCGCCCCGAACTCTCTCATGTCTACCAACGACAACAAGGGCAAACAACCACTTCACCCG_x000B_ACACCTTCGGGCCCTAACGACACGACCCCGAAACCTATCCCCGTACCCACTCCCTCAGTT_x000B_ACGCCCACAGCTGCAGGTAAGGAAAACCAAGAGCCCATCGAAAAGCGTATCACACACGCT_x000B_TTCCACGCTGAAGCAAAAACCCACAACAATGGGGTCTCTCCACCTGCCTTTAACCCGAAC_x00…
CYVCV	GZ-GXP	KX156743	ASK39490	GZ-GXP	COAT PROTEIN	China	pummelo	MSFDYTHPLYRSYPFPHYCEFDRHQLCDHHPVLKPPTHKPSAPNSLMSTNDNKGKQPLHPTPSGPNDTTP_x000B_KPIPVPTPSVTPTAAGKENQEPIEKRITHAFHAEAKTHNNGVSPPAFNPNNMNAVPLNLLNLNLRYSPVT_x000B_NSIANPKQTEAIGKAWVRILNIDPANVFLYAIDLARACADAGSSPEADIIGANEDLNPVVERNALALVVR_x000B_DFCPLRAFCAYYSRVVWNLMIKADQPPANWMKSGVDENAKFAAFDFFHGILSPASLYVPLERHPTSAERI_x000B_ANQAMFAVKIANAPGNGTDLTMDHVAFTKGRTTQHSGLRPTPFNI_x000B_	ATGAGCTTCGACTACACTCACCCTCTCTACCGCAGCTATCCATTTCCACACTACTGCGAG_x000B_TTCGACCGGCACCAACTCTGCGACCATCATCCAGTACTCAAACCTCCAACTCACAAACCC_x000B_AGCGCCCCGAACTCTCTCATGTCTACCAACGACAACAAGGGCAAACAACCACTTCACCCG_x000B_ACACCTTCGGGCCCTAACGACACGACCCCGAAACCTATCCCCGTACCCACTCCCTCAGTT_x000B_ACGCCCACAGCTGCAGGTAAGGAAAACCAAGAGCCCATCGAAAAGCGTATCACACACGCT_x000B_TTCCACGCTGAAGCAAAAACCCACAACAATGGGGTCTCTCCACCTGCCTTTAACCCGAAC_x00…
CYVCV	FJ-PK	KX156737	ASK39454		COAT PROTEIN	China	pokan	MSFDYTHPLYRSYPFPHYCEFDRHQLCDHHPVLKPPTHKPSAPNSLMSTNDNKGKQPLHPTPSGPNDTTP_x000B_KPIPVPTPSVTPTAAGKENQEPIEKRITHAFHAEAKTHNNGVSPPAFNPNNMNAVPLNLLNLNLRYSPVT_x000B_NSIANPKQTEAIGKAWVRILNIDPANVFLYAIDLARACADAGSSPEADIIGANEDLNPVVERNALALVVR_x000B_DFCPLRAFCAYYSRVVWNLMIKADQPPANWMKSGVDENAKFAAFDFFHGILSPASLYVPLERHPTSAERI_x000B_ANQAMFAVKIANAPGNGTDLTMDHVAFTKGRTTQHSGLRPTPFNI_x000B_	ATGAGCTTCGACTACACTCACCCTCTCTACCGCAGCTATCCATTTCCACACTACTGCGAG_x000B_TTCGACCGGCACCAACTCTGCGACCATCATCCAGTACTCAAACCTCCAACTCACAAACCC_x000B_AGCGCCCCGAACTCTCTCATGTCTACCAACGACAACAAGGGCAAACAACCACTTCACCCG_x000B_ACACCTTCGGGCCCTAACGACACGACCCCGAAACCTATCCCCGTACCCACTCCCTCAGTT_x000B_ACGCCCACAGCTGCAGGTAAGGAAAACCAAGAGCCCATCGAAAAGCGTATCACACACGCT_x000B_TTCCACGCTGAAGCAAAAACCCACAACAATGGGGTCTCTCCACCTGCCTTTAACCCGAAC_x00…
CYVCV	CQ-TA	KX156736	ASK39448		COAT PROTEIN	China	tarocco	MSFDYTHPLYRSYPFPHYCEFDRHQLCDHHPVLKPPTHKPSAPNSLMSTNDNKGKQPLHPTPSGPNDTTP_x000B_KPIPVPTPSVTPTAAGKENQEPIEKRITHAFHAEAKTHNNGVSPPAFNPNNMNAVPLNLLNLNLRYSPVT_x000B_NSIANPKQTEAIGKAWVRILNIDPANVFLYAIDLARACADAGSSPEADIIGANEDLNPVVERNALALVVR_x000B_DFCPLRAFCAYYSRVVWNLMIKADQPPANWMKSGVDENAKFAAFDFFHGILSPASLYVPLERHPTSAERI_x000B_ANQAMFAVKIANAPGNGTDLTMDHVAFTKGRTTQHSGLRPTPFNI	ATGAGCTTCGACTACACTCACCCTCTCTACCGCAGCTATCCATTTCCACACTACTGCGAG_x000B_TTCGACCGGCACCAACTCTGCGACCATCATCCAGTACTCAAACCTCCAACTCATAAACCC_x000B_AGCGCCCCGAACTCTCTCATGTCTACCAACGACAACAAGGGCAAACAACCACTTCACCCG_x000B_ACACCTTCGGGCCCTAACGACACGACCCCGAAACCTATCCCTGTACCCACTCCCTCAGTT_x000B_ACGCCCACAGCTGCAGGTAAGGAAAACCAAGAGCCCATCGAAAAGCGTATCACACACGCT_x000B_TTCCACGCTGAAGCAAAAACCCACAACAATGGGGTCTCTCCACCTGCCTTTAACCCGAAC_x00…
CYVCV	HU	KT124646	ANO39204	HU	COAT PROTEIN	China: Hunan	sweet orange grafted on trifoliate orange	MSFDYTHPLYRSYPFPHYCEFDRHQLCDHHPVLKPPTHKPSAPNSLMSTNXNKGKQPLHPTPSGPNDTTP_x000B_KPIPVPTPSVTPTAAGKENQEPIEKRITHAFHAEAKTHNNGVSPPAFNPNNMNAVPLNLLNLNLRYSPVT_x000B_NSIANPKQTEAIGKAWVRILNIDPANVFLYAIDLARACADAGSSPEADIIGANEDLNPVVERNALALVVR_x000B_DFCPLRAFCAYYSRVVWNLMIKADQPPANWMKSGVDENAKFAAFDFFHGILSPASLYVPLERHPTSAERI_x000B_ANQAMFAVKIANAPGNGTDLTMDHVAFTKGRTTQHSGLRPTPFNI	ATGAGCTTCGACTACACTCACCCTCTCTACCGCAGCTATCCATTTCCACACTACTGCGAG_x000B_TTCGACCGGCACCAACTCTGCGACCATCATCCAGTACTCAAACCTCCAACTCACAAACCC_x000B_AGCGCCCCGAACTCTCTCATGTCTACCAACCACAACAAGGGCAAACAACCACTTCACCCG_x000B_ACACCTTCGGGCCCTAACGACACGACCCCGAAACCTATCCCCGTACCCACTCCCTCAGTT_x000B_ACGCCCACAGCTGCAGGTAAGGAAAACCAAGAACCCATCGAAAAGCGTATCACACACGCT_x000B_TTCCACGCTGAAGCAAAAACCCACAACAATGGGGTCTCTCCACCTGCCTTTAACCCGAAC_x00…
CYVCV	JS-RN1	MK415925	QIN54964	JS-RN1	COAT PROTEIN	China: Yunnan	Nichinan 1 Wase	MSFDYTHPLYRSYPFPHYCEFDRHQLCDHHPVLKPPTHKPSAPNSLMSTNDNKGKQPLHPTPSGPNDTTP_x000B_KPIPVPTPSVTPTAAGKENQEPIEKRITHAFHAEAKTHNNGVSPPAFNPNNMNAVPLNLLNLNLKYSPVT_x000B_NSIANPKQTEAIGKAWVRILNIDPANVFLYAIDLARACADAGSSPEADIIGANEDLNPVVERNALALVVR_x000B_DFCPLRAFCAYYSRVVWNLMIKADQPPANWMKSGVDENAKFAAFDFFHGILSPASLYVPLERHPTSAERI_x000B_ANQAMFAVKIANAPGNGTDLTMDHVAFTKGRTTQHSGLRPTPFNI	ATGAGCTTCGACTACACTCACCCTCTCTACCGCAGCTATCCATTTCCACACTACTGCGAG_x000B_TTCGACCGGCACCAACTCTGCGACCATCATCCAGTACTCAAACCTCCAACTCACAAACCC_x000B_AGCGCCCCGAACTCTCTCATGTCTACCAACGACAACAAGGGCAAACAACCACTTCACCCG_x000B_ACACCTTCGGGCCCTAACGACACGACCCCGAAACCTATCCCCGTACCCACTCCCTCAGTT_x000B_ACGCCCACAGCTGCAGGTAAGGAAAACCAAGAGCCCATCGAAAAGCGTATCACACACGCT_x000B_TTCCACGCTGAAGCAAAAACCCACAACAATGGGGTCTCTCCACCTGCCTTTAACCCGAAC_x00…
CYVCV	CQ	NC_026592	YP_009124992	CQ	COAT PROTEIN	China: Chongqing	Eureka lemon	MSFDYTHPLYRSYPFPHYCEFDRHQLCDHHPVLKPPTHKPSAPNSLMSTNDNKGKEPLHPTPSGPNDTTP_x000B_KPIPVPTPSVTPTAAGKENQEPIEKRITHAFHAEAKTHNNGVSPPAFNPNNMNAVPLNLLNLNLRYSPVT_x000B_NSIANPKQTEAIGKAWVRILNIDPANVFLYAIDLARACADAGSSPEADIIGANEDLNPVVERNALALVVR_x000B_DFCPLRAFCAYYSRVVWNLMIKADQPPANWMKSGVDENAKFAAFDFFHGILSPASLYVPLERHPTSAERI_x000B_ANQAMFAVKIANAPGNGTDLTMDHVAFTKGRTTQHSGLRPTPFNI	ATGAGCTTCGACTACACTCACCCTCTCTACCGCAGCTATCCATTTCCACACTACTGCGAG_x000B_TTCGACCGGCACCAACTCTGCGACCATCATCCAGTACTCAAACCTCCAACTCACAAACCC_x000B_AGCGCCCCGAACTCTCTCATGTCTACCAACGACAACAAGGGCAAAGAACCACTTCACCCG_x000B_ACACCTTCGGGCCCTAACGACACGACCCCGAAACCTATCCCCGTACCCACTCCCTCAGTT_x000B_ACGCCCACAGCTGCAGGTAAGGAAAACCAAGAACCCATCGAAAAGCGTATCACACACGCT_x000B_TTCCACGCTGAAGCAAAAACCCACAACAATGGGGTCTCTCCACCTGCCTTTAACCCGAAC_x00…
CYVCV	YN-NH	KX156752	ASK39544	YN-NH	COAT PROTEIN	China	sweet orange	MSFDYTHPLYRSYPFPHYCEFDRHQLCDHHPVLKPPTHKPSAPNSLMSTNDNKGKQPLHPTPSGPNDTTP_x000B_KPIPVPTPSVTPTAAGKENQEPIEKRITHAFHAEAKTHNNGVSPPAFNPNNMNAVPLNLLNLNLRYSPVT_x000B_NSIANPKQTEAIGKAWVRILNIDPANVFLYAIDLARACADAGSSPEADIIGANEDLNPVVERNALALVVR_x000B_DFCPLRAFCAYYSRVVWNLMIKADQPPANWMKSGVDENAKFAAFDFFHGILSPASLYVPLERHPTSAERI_x000B_ANQAMFAVKIANAPGNGTDLTMDHVAFTKGRTTQSSGLRPTPFNI_x000B_	ATGAGCTTCGACTACACTCACCCTCTCTACCGCAGCTATCCATTTCCACACTACTGCGAG_x000B_TTCGACCGGCACCAACTCTGCGACCATCATCCAGTACTCAAACCTCCAACTCACAAACCC_x000B_AGCGCCCCGAACTCTCTCATGTCTACCAACGACAACAAGGGCAAACAACCACTTCACCCG_x000B_ACACCTTCGGGCCCTAACGACACGACCCCGAAACCTATCCCTGTACCCACTCCCTCAGTT_x000B_ACGCCCACAGCTGCAGGTAAGGAAAACCAAGAGCCCATCGAAAAGCGCATCACACACGCT_x000B_TTCCACGCTGAAGCAAAAACCCACAACAATGGGGTCTCTCCACCTGCCTTTAACCCGAAC_x00…
CYVCV	HN-STJ	KX156745	ASK39502	HN-STJ	COAT PROTEIN	China	tangerine	MSFDYTHPLYRSYPFPHYCEFDRHQLCDHHPVLKPPTHKPSAPNSLMSTNDNKGKEPLHPIPSGPNDTTP_x000B_KPIPVPTPSVTPTAAGKENQEPIEKRITHAFHAEAKTHNNGVSPPAFNPNNMNAVPLNLLNLNLRYSPVT_x000B_NSIANPKQTEAIGKAWVRILNIDPANVFLYAIDLARACADAGSSPEADIIGANEDLNPVVERNALALVVR_x000B_DFCPLRAFCAYYSRVVWNLMIKADQPPANWMKSGVDENAKFAAFDFFHGILSPASLYVPLERHPTSAERI_x000B_ANQAMFAVKIANAPGNGTDLTMDHVAFTKGRTTQHSGLRPTPFNI_x000B_	ATGAGCTTCGACTACACTCACCCTCTCTACCGCAGCTATCCATTTCCACACTACTGCGAG_x000B_TTCGACCGGCACCAACTCTGCGACCATCATCCAGTACTCAAACCTCCAACTCACAAACCC_x000B_AGCGCCCCGAACTCTCTCATGTCTACCAACGACAACAAGGGCAAAGAACCACTTCACCCG_x000B_ATACCTTCGGGCCCTAACGACACGACCCCGAAACCTATCCCCGTACCCACTCCCTCAGTT_x000B_ACGCCCACAGCTGCAGGTAAGGAAAACCAAGAGCCCATCGAAAAGCGTATCACACACGCT_x000B_TTCCACGCTGAAGCAAAAACCCACAACAATGGGGTCTCTCCACCTGCCTTTAACCCGAAC_x00…
ICRV	SIR-48	MW233698	UOF76654	H-K-SIR-48	coat protein_x000B_ICRSV-B	India: Sirsa, Haryana	kinnow	MSFDYTHPLYRSYPFPHYCEFDRHQLCDHHPVLKPPTHKPSTPNSHMSTNDNKGKQPLHPTPSGPNDTTP_x000B_KPIPAPTPSATPAAAGKENQEPIEKRIIHAFHAEAKTHNNGVSPPAFNPNNMNAVPLNLLNLNLRYSPVT_x000B_NSIANPKQTEAIGKAWVRILNIDPANVFLYAIDLARACADAGSSPEADIIGANEDLNPVVERNALALVVR_x000B_DFCPLRAFCAYYSRVVWNLMIKADQPPANWMKSGVDENAKFAAFDFFHGILSPASLYVPLERHPTSAERI_x000B_ANQAMFAVKIANAPGNGTDLTMDHVAFTKGRTTQSSGLRPTPFNI	ATGAGCTTTGACTACACACACCCTCTCTACCGCAGCTATCCATTTCCACACTACTGCGAGTTCGACCGGC_x000B_ACCAACTCTGCGACCATCATCCAGTACTCAAACCCCCAACTCACAAACCCAGTACCCCGAACTCTCACAT_x000B_GTCTACCAACGACAACAAGGGCAAACAACCACTTCACCCGACACCTTCGGGCCCTAACGACACGACCCCG_x000B_AAACCTATCCCGGCACCCACTCCCTCAGCTACGCCCGCAGCAGCAGGTAAGGAAAACCAAGAGCCCATCG_x000B_AAAAGCGTATCATACACGCTTTCCACGCTGAAGCAAAAACCCACAACAATGGGGTCTCTCCACCTGCCTT_x000B_TAACCCGAACAATA…
ICRV	Si-5	MN518764	QIU78636	ICRSV-Si-5	coat protein_x000B_ICRSV-B	India: Sirsa, Haryana	kinnow	MSFDYTHPLYRSYPFPHYCEFDRHQLCDHHPVLKPPTHKPSTPNSHMSTNDNKGKQPLHPTPSGPNDTTP_x000B_KPIPAPTPSATPAAAGKENQEPIEKRIIHAFHAEAKTHNNGVSPPAFNPNNMNAVPLNLLNLNLRYSPVT_x000B_NSIANPKQTEAIGKAWVRILNIDPANVFLYAIDLARACADAGSSPEADIIGANEDLNPVVERNALALVVR_x000B_DFCPLRAFCAYYSRVVWNLMIKADQPPANWMKSGVDENAKFAAFDFFHGILSPASLYVPLERHPTSAERI_x000B_ANQAMFAVKIANAPGNGTDLTMDHVAFTKGRTTQSSGLRPTPFNI	ATGAGCTTTGACTACACACACCCTCTCTACCGCAGCTATCCATTTCCACACTACTGCGAGTTCGACCGGC_x000B_ACCAACTCTGCGACCATCATCCAGTACTCAAACCCCCAACTCACAAACCCAGTACCCCGAACTCTCACAT_x000B_GTCTACCAACGACAACAAGGGCAAACAACCACTTCACCCGACACCTTCGGGCCCTAACGACACGACCCCG_x000B_AAACCTATCCCGGCACCCACTCCCTCAGCTACGCCCGCAGCAGCAGGTAAGGAAAACCAAGAGCCCATCG_x000B_AAAAGCGTATCATACACGCTTTCCACGCTGAAGCAAAAACCCACAACAATGGGGTCTCTCCACCTGCCTT_x000B_TAACCCGAACAATA…
ICRV	Si-4	MN518766	QIU78638	ICRSV-Si-4	coat protein_x000B_ICRSV-B	India: Sirsa, Haryana	kinnow	MSFDYTHPLYRSYPFPHYCEFDRHQLCDHHPALKPPTHKPSTPNSHMSTNDNKGKQPLHPTPSGPNDTTP_x000B_KPIPVPTPSATPTAAGKENQEPIEKRIIHAFHAEAKTHNNGVSPPAFNPNNMNAVPLNLLNLNLRYSPVT_x000B_NSIANPKQTEAIGKAWVRILNIDPANVFLYAIDLARACADAGSSPEADIIGANEDLNPVVERNALALVVR_x000B_DFCPLRAFCAYYSRVVWNLMIKADQPPANWMKSGVDENAKFAAFDFFHGILSPASLYVPLERHPTSAERI_x000B_ANQAMFAVKIANAPGNGTDLTMDHVAFTKGRTTQSSGLRPTPFNI	ATGAGCTTTGACTACACACACCCTCTCTACCGCAGCTATCCATTTCCACACTACTGCGAGTTCGACCGGC_x000B_ACCAACTCTGCGACCATCATCCAGCACTCAAACCCCCAACTCACAAACCCAGTACCCCGAACTCTCACAT_x000B_GTCTACCAACGACAACAAGGGCAAACAACCACTTCACCCGACACCTTCGGGCCCTAACGACACGACCCCG_x000B_AAACCTATCCCGGTACCCACTCCCTCAGCTACGCCCACAGCTGCAGGTAAGGAAAACCAAGAGCCCATCG_x000B_AAAAGCGTATCATACACGCTTTCCACGCTGAAGCAAAAACCCACAACAATGGGGTCTCTCCACCTGCCTT_x000B_TAACCCGAACAATA…
ICRV	SIR-49	MW233700	UOF76656	H-K-SIR-49	coat protein_x000B_ICRSV-B	India: Sirsa, Haryana	kinnow	MSFDYTHPLYRSYPFPHYCEFDRHQLCDHHPALKPPTHKPSTPNSHMSTNDNKGKQPLHPTPSGPNDTTP_x000B_KPIPVPTPSATPTAAGKENQEPIEKRIIHAFHAEAKTHNNGVSPPAFNPNNMNAVPLNLLNLNLRYSPVT_x000B_NSIANPKQTEAIGKAWVRILNIDPANVFLYAIDLARACADAGSSPEADIIGANEDLNPVVERNALALVVR_x000B_DFCPLRAFCAYYSRVVWNLMIKADQPPANWMKSGVDENAKFAAFDFFHGILSPASLYVPLERHPTSAERI_x000B_ANQAMFAVKIANAPGNGTDLTMDHVAFTKGRTTQSSGLRPTPFNI	ATGAGCTTTGACTACACACACCCTCTCTACCGCAGCTATCCATTTCCACACTACTGCGAGTTCGACCGGC_x000B_ACCAACTCTGCGACCATCATCCAGCACTCAAACCCCCAACTCACAAACCCAGTACCCCGAACTCTCACAT_x000B_GTCTACCAACGACAACAAGGGCAAACAACCACTTCACCCGACACCTTCGGGCCCTAACGACACGACCCCG_x000B_AAACCTATCCCGGTACCCACTCCCTCAGCTACGCCCACAGCTGCAGGTAAGGAAAACCAAGAGCCCATCG_x000B_AAAAGCGTATCATACACGCTTTCCACGCTGAAGCAAAAACCCACAACAATGGGGTCTCTCCACCTGCCTT_x000B_TAACCCGAACAATA…
ICRV	FAZ-41	MW233701	UOF76657	P-K-FAZ-41	coat protein_x000B_ICRSV-B	India: Fazilka, Punjab	kinnow	MSFDYTQPLYRSYPFPHYCEFDRHQLCDHHPALKPPTHKPSAPNSHMSTNDNKGKQPLHPTPSGPNDTTP_x000B_KPIPVPTPSATPTAAGKENQEPIEKRIIHAFHAEAKTHNNGVSPPAFNPNNMNAVPLNLLNLNLRYSPVT_x000B_NSIANPKQTEAIGKAWVRILNIDPANVFLYAIDLARACADAGSSPEADIIGANEDLNPVVERNALALVVR_x000B_DFCPLRAFCAYYSRVVWNLMIKADQPPANWMKSGVDENAKFAAFDFFHGILSPASLYVPLERHPTSAERI_x000B_ANQAMFAVKIANAPGNGTDLTMDHVAFTKGRTTQSSGLRPTPFNT	ATGAGCTTTGACTACACACAACCTCTTTACCGCAGCTATCCATTTCCTCATTACTGCGAGTTCGACCGGC_x000B_ACCAACTCTGCGACCATCATCCAGCACTCAAACCTCCAACTCACAAACCCAGTGCCCCGAACTCTCACAT_x000B_GTCTACCAACGACAACAAGGGCAAACAACCACTTCACCCGACACCTTCGGGCCCTAACGACACGACCCCG_x000B_AAACCTATCCCTGTACCCACTCCCTCAGCTACGCCCACAGCTGCAGGTAAGGAAAACCAAGAGCCCATCG_x000B_AAAAACGTATCATACACGCTTTCCACGCTGAAGCAAAAACCCACAACAATGGGGTCTCTCCACCTGCCTT_x000B_TAACCCGAACAATA…
ICRV	ABH-19	MW233704	UOF76660	P-K-ABH-19	COAT PROTEIN_x000B_ICRSV-B	India: Abohar,Punjab	Kinnow	MSFDYTQPLYRSYPFPHYCEFDRHQLCDHHPALKPPTHKPSAQNSHMSTNDNKGKQPLHPTPSGPNDTTP_x000B_KPIPVPTPSATPTAAGKENQEPIEKRIIHAFHAEAKTHNNGVSPPAFNPNNMNAVPLNLLNLNLRYSPVT_x000B_NSIANPKQTEAIGKAWVRILNIDPANVFLYAIDLARACADAGSSPEADIIGANEDLNPVVERNALALVVR_x000B_DFCPLRAFCAYYSRVVWNLMIKADQPPANWMKSGVDENAKFAAFDFFHGILSPASLYVPLERHPTSAERI_x000B_ANQAMFAVKIANAPGNGTDLTMDHVAFTKGRTTQPSGLRPTPFNI	ATGAGCTTTGACTACACACAACCTCTTTACCGCAGCTATCCATTTCCTCATTACTGCGAGTTCGACCGGC_x000B_ACCAACTCTGCGACCATCATCCAGCACTCAAACCTCCAACTCACAAACCCAGCGCCCAGAACTCTCACAT_x000B_GTCTACCAACGACAACAAGGGCAAACAACCACTTCACCCGACACCTTCGGGCCCTAACGACACGACCCCG_x000B_AAACCTATCCCTGTACCCACTCCCTCAGCTACGCCCACAGCTGCAGGTAAGGAAAACCAAGAGCCCATCG_x000B_AAAAACGTATCATACACGCTTTCCACGCTGAAGCAAAAACCCACAACAATGGGGTCTCTCCACCTGCCTT_x000B_TAACCCGAACAATA…
CYVCV	KPMI	KT696513	AOO32398	KPMI	COAT PROTEIN	Pune: India	kinnow	MSFDYTHPLYRSYPFPHYCEFDRHQLCDHHPVLKPPTHKPSAPNSHMSTNDNKGKQPLHPTPSGPNDTTP_x000B_KPIPVPTPSATPTAAGKENQEPIEKRIIHAFHAEAKTHNNGVSPPAFNPNNMNAVPLNLLNLNLRYSPVT_x000B_NSIANPKQTEAIGKAWVRILNIDPANVFLYAIDLARACADAGSSPEADIIGANEDLNPVVERNALALVVR_x000B_DFCPLRAFCAYYSRVVWNLMIKADQPPANWMKSGVDENAKFAAFDFFHGILSPASLYVPLERHPTSAERI_x000B_ANQAMFAVKIANAPGNGTDLTMDHVAFTKGRTTQSSGLRPTPFNI	ATGAGCTTCGACTACACTCACCCTCTCTACCGCAGCTATCCATTTCCACATTACTGCGAGTTCGACCGGCACCAACTCTGCGACCATCATCCAGTACTCAAGCCTCCAACTCACAAACCCAGTGCCCCGAACTCTCACATGTCTACCAACGACAACAAGGGCAAGCAACCACTTCACCCGACACCTTCGGGCCCTAACGACACGACCCCGAAACCTATCCCTGTACCCACTCCCTCAGCTACGCCCACAGCTGCAGGTAAGGAAAACCAAGAGCCTATCGAAAAGCGTATCATACACGCTTTCCACGCTGAAGCAAAGACCCACAACAATGGGGTCTCTCCACCTGCCTTTAACCCGAACAATATGAACGCTGTGCCGCTGAACCTGCTCAACCTCAAC…
ICRV	Si-3	MN518765	QIU78637	ICRSV-Si-3	COAT PROTEIN_x000B_ICRSV-B	India: Sirsa, Haryana	Kinnow	MSFDYTHPLYRSYPFPHYCEFDRHQLCDHHPALKPPTHKPSAPNSHMSTNDDKGKQPLHPTPSGPNDTTP_x000B_KPIPAPTPSATPTAAGKENQEPIEKRIIHAFHAEAKTHNNGVSPPAFNPNNMNAVPLNLLNLNLRYSPVT_x000B_NSIANPKQTEAIGKAWVRILNIDPANVFLYAIDLARACADAGSSPEADIIGANEDLNPVVERNALALVVR_x000B_DFCPLRAFCAYYSRVVWNLMIKADQPPANWMKSGVDENAKFAAFDFFHGILSPASLYVPLERHPTSAERI_x000B_ANQAMFAVKIANAPGNGTDLTMDHVAFTKGRTTQSSGLRPTPFNI	ATGAGCTTTGACTACACACACCCTCTCTACCGCAGCTATCCATTTCCACACTACTGCGAGTTCGACCGGC_x000B_ACCAACTCTGCGACCATCATCCAGCACTCAAACCTCCAACTCACAAACCCAGTGCCCCGAACTCTCACAT_x000B_GTCTACCAACGACGACAAGGGCAAACAGCCACTTCACCCAACACCCTCGGGCCCTAACGACACGACCCCG_x000B_AAACCTATCCCTGCACCCACTCCCTCAGCTACGCCCACAGCTGCAGGTAAGGAAAACCAAGAGCCCATCG_x000B_AAAAACGTATCATACACGCTTTCCACGCTGAAGCAAAAACCCACAACAATGGGGTCTCTCCACCTGCCTT_x000B_CAACCCGAACAATA…
ICRV	SIR-47	MW233699	UOF76655	H-K-SIR-47	COAT PROTEIN_x000B_ICRSV-B	India: Sirsa, Haryana	Kinnow	MSFDYTHPLYRSYPFPHYCEFDRHQLCDHHPALKPPTHKPSAPNSHMSTNDDKGKQPLHPTPSGPNDTTP_x000B_KPIPAPTPSATPTAAGKENQEPIEKRIIHAFHAEAKTHNNGVSPPAFNPNNMNAVPLNLLNLNLRYSPVT_x000B_NSIANPKQTEAIGKAWVRILNIDPANVFLYAIDLARACADAGSSPEADIIGANEDLNPVVERNALALVVR_x000B_DFCPLRAFCAYYSRVVWNLMIKADQPPANWMKSGVDENAKFAAFDFFHGILSPASLYVPLERHPTSAERI_x000B_ANQAMFAVKIANAPGNGTDLTMDHVAFTKGRTTQSSGLRPTPFNI	ATGAGCTTTGACTACACACACCCTCTCTACCGCAGCTATCCATTTCCACACTACTGCGAGTTCGACCGGC_x000B_ACCAACTCTGCGACCATCATCCAGCACTCAAACCTCCAACTCACAAACCCAGTGCCCCGAACTCTCACAT_x000B_GTCTACCAACGACGACAAGGGCAAACAGCCACTTCACCCAACACCCTCGGGCCCTAACGACACGACCCCG_x000B_AAACCTATCCCTGCACCCACTCCCTCAGCTACGCCCACAGCTGCAGGTAAGGAAAACCAAGAGCCCATCG_x000B_AAAAACGTATCATACACGCTTTCCACGCTGAAGCAAAAACCCACAACAATGGGGTCTCTCCACCTGCCTT_x000B_CAACCCGAACAATA…
CYVCV	CA15	OQ418500	WRN92096	CA15	COAT PROTEIN	USA: California	lemon	MSFDYTHPLYRSYPFPHYCEFDRHQLCDHHPALKPPTHRPSAPNSLMSTNDDKGKQPLHPTPSGPNDTTP_x000B_KPIPVPTPSATPTAAGKENQEPIEKRITHAFHAEAKTHNNGVSPPAFNPNNMNAVPLNLLNLNLRYSPVT_x000B_NSIANPKQTEAIGKAWVRILNIDPANVFLYAIDLARACADAGSSPEADIIGANEDLNPVVERNALALVVR_x000B_DFCPLRAFCAYYSRVVWNLMIKADQPPANWMKSGVDENAKFAAFDFFHGILSPASLYVPLERHPTSAERI_x000B_ANQAMFAVKIANAPGNGTDLTMDHVAFTKGRTTQTSGLRPTPFNI_x000B_	ATGAGCTTCGACTACACTCACCCTCTCTACCGCAGCTATCCATTTCCACACTACTGCGAG TTCGACCGGCACCAACTCTGCGACCATCATCCAGCACTCAAACCTCCAACTCACAGACCC AGTGCCCCGAACTCTCTCATGTCTACCAACGACGACAAGGGCAAACAACCACTTCACCCG ACACCTTCGGGCCCTAACGACACGACCCCGAAACCTATCCCTGTACCCACTCCCTCAGCT ACGCCCACAGCTGCAGGTAAGGAAAACCAAGAGCCCATCGAAAAGCGTATCACACACGCT TTCCACGCTGAAGCAAAAACCCACAACAATGGGGTTTCTCCACCTGCATTTAACCCGAAC AATATGAATGCTGTGCCGCTGAACCTACTCAAC…
CYVCV	CA4	OQ418492	WRN92048		COAT PROTEIN	USA: California	orange	MSFDYTHPLYRSYPFPHYCEFDRHQLCDHHPVLKPPTHKPSAPNSLMSTDNNKGKQPLHPTPSGPNDTTP_x000B_KPIPVPTPSATPTAAGKENQEPIEKRIIHAFHAEAKTHNNGVSPPAFNPNNMNAVPLNLLNLNLRYSPVT_x000B_NSIANPKQTEAIGKAWVRILNIDPANVFLYAIDLARACADAGSSPEADIIGANEDLNPVVERNALALVVR_x000B_DFCPLRAFCAYYSRVVWNLMIKADQPPANWMKSGVDENAKFAAFDFFHGILSPASLYVPLERHPTSAERI_x000B_ANQAMFAVKIANSPGNGTDLTMDHVAFTKGRTTHSSGLRPTPFNI_x000B_	ATGAGCTTCGACTACACTCACCCTCTCTACCGCAGCTATCCATTTCCACATTACTGCGAGTTCGACCGGCACCAACTCTGCGACCATCATCCAGTACTCAAACCTCCAACTCACAAACCCAGCGCCCCGAACTCTCTCATGTCTACCGACAACAACAAGGGCAAACAACCACTTCACCCGACACCTTCGGGCCCTAACGACACGACCCCGAAACCTATCCCTGTACCCACTCCCTCAGCTACGCCCACAGCTGCAGGTAAGGAAAACCAAGAGCCCATCGAAAAGCGTATCATACACGCTTTCCACGCTGAAGCAAAGACCCACAACAATGGGGTCTCTCCACCTGCCTTTAACCCGAACAATATGAATGCTGTGCCGCTGAACCTGCTCAACCTCAAC…
CYVCV	PK	KP313241	AJO26409	PK	COAT PROTEIN	Pakistan	Galgal lemon	MSFDYTHPLYRSYPFPHYCEFDRHRLCDHHPALKPPTHKPSTPNSLMSTDDNKGKQPLHPTPSGPNDTTP_x000B_KPIPAHTPSATPTAAGKENQEPIEKRIIHAFHAEAKTHNNGVSPPAFNPNNMNAVPLNLLNLNLRYSPVT_x000B_NSIANPKQTEAIGKAWVRILNIDPANVFLYAIDLARACADAGSSPEADIIGANEDLNPVVERNALALVVR_x000B_DFCPLRAFCAYYSRVVWNLMIKADQPPANWMKSGVDENAKFAAFDFFHGILSPASLYVPLERHPTSAERI_x000B_ANQAMFAVKIANAPGNGTDLTMDHVAFTKGRTTQSSGLRPTPFNI	ATGAGCTTCGACTACACTCACCCTCTCTACCGCAGCTATCCATTTCCACACTACTGCGAGTTCGACCGGCACCGACTCTGCGACCATCATCCAGCACTCAAACCTCCAACTCACAAACCCAGTACTCCGAACTCTCTCATGTCTACCGACGACAACAAGGGCAAACAGCCACTTCACCCGACACCTTCGGGCCCTAACGACACGACCCCGAAACCTATCCCTGCACACACTCCCTCAGCTACGCCCACAGCTGCAGGTAAGGAAAACCAAGAGCCCATCGAAAAGCGTATCATACACGCTTTCCACGCTGAAGCAAAAACCCACAACAATGGGGTCTCCCCACCTGCCTTTAACCCGAACAATATGAATGCTGTGCCGCTGAACCTGCTCAACCTCAAC…
CYVCV	CA16	OQ418501	WRN92102	CA16	COAT PROTEIN	USA: California	mandarin	MSFDYTHPLYRSYPFPHYCEFDRHQLCDHHPVLKPPTHKPSAPNSLMSTDNNKGKQPLHPTPSGPNDTTP_x000B_KPIPVPTPSATPTAAGKENQEPIEKRIIHAFHAEAKTHNNGVSPPAFNPNNMNAVPLNLLNLNLRYSPVT_x000B_NSIANPKQTEAIGKAWVRILNIDPANVFLYAIDLARACADAGSSPEADIIGANEDLNPVVERNALALVVR_x000B_DFCPLRAFCAYYSRVVWNLMIKADQPPANWMKSGVDENAKFAAFDFFHGILSPASLYVPLERHPTSAERI_x000B_ANQAMFAVKIANSPGNGTDLTMDHVAFTKGRTTHSSGLRPTPFNI	ATGAGCTTCGACTACACTCACCCTCTCTACCGCAGCTATCCATTTCCACATTACTGCGAGTTCGACCGGCACCAACTCTGCGACCATCATCCAGTACTCAAACCTCCAACTCACAAACCCAGCGCCCCGAACTCTCTCATGTCTACCGACAACAACAAGGGCAAACAACCACTTCACCCGACACCTTCGGGCCCTAACGACACGACCCCGAAACCTATCCCTGTACCCACTCCCTCAGCTACGCCCACAGCTGCAGGTAAGGAAAACCAAGAGCCCATCGAAAAGCGTATCATACACGCTTTCCACGCTGAAGCAAAGACCCACAACAATGGGGTCTCTCCACCTGCCTTTAACCCGAACAATATGAATGCTGTGCCGCTGAACCTGCTCAACCTCAAC…
CYVCV	CA14	OQ418499	WRN92090	CA14	COAT PROTEIN	USA: California	orange	MSFDYTHPLYRSYPFPHYCEFDRHQLCDHHPALKPPTHRPSAPNSLMSTNDNKGKQPLHPTPSGPNDTTP_x000B_KPIPVPTPSATPTAAGKENQEPIEKRITHAFHAEAKTHNNGVSPPAFNPNNMNAVPLNLLNLNLRYSPVT_x000B_NSIANPKQTEAIGKAWVRILNIDPANVFLYAIDLARACADAGSSPEADIIGANEDLNPVVERNALALVVR_x000B_DFCPLRAFCAYYSRVVWNLMIKADQPPANWMKSGVDENAKFAAFDFFHGILSPASLYVPLERHPTSAERI_x000B_ANQAMFAVKIANAPGNGTDLTMDHVAFTKGRTTQTSGLRPTPFNI	ATGAGCTTCGACTACACTCACCCTCTCTACCGCAGCTATCCATTTCCACACTACTGCGAGTTCGACCGGCACCAACTCTGCGACCATCATCCAGCACTCAAACCTCCAACTCACAGACCCAGTGCCCCGAACTCTCTCATGTCTACCAACGACAACAAGGGCAAACAACCACTTCACCCGACACCTTCGGGCCCTAACGACACGACCCCGAAACCTATCCCTGTACCCACTCCCTCAGCTACGCCCACAGCTGCAGGTAAGGAAAACCAAGAGCCCATCGAAAAGCGTATCACACACGCTTTCCACGCTGAAGCAAAAACCCACAACAATGGGGTTTCTCCACCGGCCTTTAACCCGAACAATATGAATGCTGTGCCGCTGAACCTGCTCAACCTCAAC…
CYVCV	GD-STP	KX156740	ASK39472	GD-STP	COAT PROTEIN	China	pummelo	MSFDYTHPLYRSYPFPHYCEFDRHQLCDHHPVLKPPTHKPSAPNSLMSTNDDKGKQPLHPTPSGPNDTTP_x000B_KPIPVPTPSVTPTAAGKENQEPIEKRITHAFHAEARTHNNGVSPPAFNPNNMNAVPLNLLNLNLRYSPVT_x000B_NSIANPKQTEAIGKAWVRILNIDPANVFLYAIDLARACADAGSSPEADIIGANEDLNPVVERNALALVVR_x000B_DFCPLRAFCAYYSRVVWNLMIKADQPPANWMKSGVDENAKFAAFDFFHGILSPASLYVPLERHPTSAERI_x000B_ANQAMFAVKIANAPGNGTDLTMDHVAFTKGRTTQHSGLRPTPFNI	ATGAGCTTCGACTACACTCACCCTCTCTACCGCAGCTATCCATTTCCACACTACTGCGAGTTCGACCGGCACCAACTCTGCGACCATCATCCAGTACTCAAACCTCCAACTCACAAACCCAGCGCCCCGAACTCTCTCATGTCTACCAACGACGACAAGGGCAAACAACCACTTCACCCGACACCCTCGGGCCCTAACGACACGACCCCAAAACCTATCCCCGTACCCACTCCCTCTGTTACGCCCACAGCTGCAGGTAAGGAAAACCAAGAGCCCATCGAAAAGCGTATCACACACGCTTTCCACGCTGAAGCAAGAACCCACAACAATGGGGTCTCTCCACCTGCCTTTAACCCGAACAACATGAATGCTGTGCCGCTGAACCTGCTCAACCTCAAC…
CYVCV	GD-STJ	KX156739	ASK39466	GD-STJ	COAT PROTEIN	China	shatangju	MSFDYTHPLYRSYPFPHYCEFDRHQLCDHHPVLKPPTHKPSAPNSLMSTNDNKGKQPLHPTPSGPDDTTP_x000B_KPIPVPTPSVTPTAAGKENQEPIEKRITHAFHAEAKTHNNGVSPPAFNPNNMNAVPLNLLNLNLRYSPVT_x000B_NSIANPKQTEAIGKAWVRILNIDPANVFLYAIDLARACADAGSSPEADIIGANEDLNPVVERNALALVVR_x000B_DFCPLRAFCAYYSRVVWNLMIKADQPPANWMKSGVDENAKFAAFDFFHGILSPASLYVPLERHPTSAERI_x000B_ANQAMFAVKIANAPGNGTDLTMDHVAFTKGRTTQHSGLRPTPFNI	ATGAGCTTCGACTACACTCACCCTCTCTACCGCAGCTATCCATTTCCACACTACTGCGAGTTCGACCGGCACCAACTCTGCGACCATCATCCAGTACTCAAACCTCCAACTCACAAACCCAGCGCCCCGAACTCTCTCATGTCTACCAACGACAACAAGGGCAAACAACCACTTCACCCGACACCCTCGGGCCCTGACGACACGACCCCGAAACCTATCCCCGTACCCACTCCCTCAGTTACGCCCACAGCTGCAGGTAAGGAAAACCAAGAGCCCATCGAAAAGCGTATCACACACGCTTTCCACGCTGAAGCAAAAACCCACAACAATGGGGTCTCTCCACCTGCCTTTAACCCGAACAACATGAATGCTGTGCCGCTGAACCTGCTCAACCTCAAC…
CYVCV	YN-SA	KX156734	ASK39436	YN-SA	COAT Protein	China	Citrus unshiu (satsuma)	MSFDYTHPLYRSYPFPHYCEFDRHQLCDHHPVLKPPTHKPSAPNSLMSTDDNKGKQPLHPTPSGPNDTTP_x000B_KPIPVPTPSVTPTAAGKENQEPIEKRITHAFHAEAKTHNNGVSPPAFNPNNMNAVPLNLLNLNLRYSPVT_x000B_NSIANPKQTEAIGKAWVRILNIDPANVFLYAIDLARACADAGSSPEADIIGANEDLNPVVERNALALVVR_x000B_DFCPLRAFCAYYSRVVWNLMIKADQPPANWMKSGVDENAKFAAFDFFHGILSPASLYVPLERHPTSAERI_x000B_ANQAMFAVKIANAPGNGTDLTMDHVAFTKGRTTQHSGLRPTPFNI	ATGAGCTTCGACTACACTCACCCTCTTTACCGCAGCTATCCATTTCCACACTACTGCGAGTTCGACCGGCACCAACTCTGCGACCATCATCCAGTACTCAAACCTCCAACTCACAAACCCAGCGCCCCGAACTCTCTCATGTCTACCGACGACAACAAGGGCAAACAACCACTTCACCCGACACCTTCGGGCCCTAACGACACGACCCCGAAACCTATCCCTGTACCCACTCCCTCAGTTACGCCCACAGCTGCAGGTAAGGAAAACCAAGAGCCCATCGAAAAGCGTATCACACACGCTTTCCACGCTGAAGCAAAAACCCACAACAATGGGGTCTCTCCACCTGCCTTTAACCCGAACAACATGAATGCTGTGCCGCTGAACCTGCTCAACCTCAAC…
CYVCV	KLI	KT696516	AOX15534		COAT PROTEIN	India: Kalimpong	lemon	MSFDYTHPLYRSYPFPHYCEFDRHLLCDHHPVLKPPTHKPSAPNSLMSTNNNKGKQPLHPTPSGPNDTTP_x000B_KPIPVPNPSATPTAAGKENQEPIERRIIHAFHAEAKTHNNGVSPPAFNPNNMNAVPLNLLNLNLRYPPVT_x000B_NSIANPKQTEAIGKAWVRILNIDPANVFLYAIDLARACADAGSSPEADIIGANEDLNPVVERNALALVVR_x000B_DFCPLRVFCAYYSRVVWNLMIKADQPPANWMKSGVDENAKFAAFDFFHGILSPASLYVPLERHPTSAERI_x000B_ANQAMFAVKIANAPGNGTDLTMDHVAFTKGRTTQSSGLRPTPFNI	ATGAGCTTCGACTACACTCACCCTCTCTACCGCAGCTATCCATTTCCACATTACTGCGAGTTCGACAGGC_x000B_ACCTACTCTGCGACCATCATCCAGTACTCAAACCTCCAACTCACAAACCCAGTGCCCCGAACTCTCTCAT_x000B_GTCTACCAACAACAACAAGGGCAAACAACCACTTCACCCGACACCTTCGGGCCCTAACGACACGACCCCG_x000B_AAACCTATCCCTGTACCCAATCCCTCAGCTACGCCCACAGCTGCAGGTAAGGAAAACCAAGAGCCCATCG_x000B_AAAGGCGTATCATACACGCTTTCCACGCTGAAGCAAAAACCCACAACAATGGGGTCTCTCCACCTGCCTT_x000B_CAACCCGAACAATA…
CYVCV	CA3	OR670061	WVD52764		COAT PROTEIN	USA	Citrus hystrix	MSFDYTHPLYRSYPFPHYCEFDRHQLCDHHPVLKPPTHKPSAPNSLMSTDNNKGKQPLHPTPSGPNDTTP_x000B_KPIPVPTPSATPTAAGKENQEPIEKRIIHAFHAEAKTHNNGVSPPAFNPNNMNAVPLNLLNLNLRYSPVT_x000B_NSIANPKQTEAIGKAWVRILNIDPANVFLYAIDLARACADAGSSPEADIIGANEDLNPVVERNALALVVR_x000B_DFCPLRAFCAYYSRVVWNLMIKADQPPANWMKSGVDENAKFAAFDFFHGILSPASLYVPLERHPTSAERI_x000B_ANQAMFAVKIANSPGNGTDLTMDHVAFTKGRTTHSSGLRPTPFNI	ATGAGCTTCGACTACACTCACCCTCTCTACCGCAGCTATCCATTTCCACATTACTGCGAGTTCGACCGGCACCAACTCTGCGACCATCATCCAGTACTCAAACCTCCAACTCACAAACCCAGCGCCCCGAACTCTCTCATGTCTACCGACAACAACAAGGGCAAACAACCACTTCACCCGACACCTTCGGGCCCTAACGACACGACCCCGAAACCTATCCCTGTACCCACTCCCTCAGCTACGCCCACAGCTGCAGGTAAGGAAAACCAAGAGCCCATTGAAAAGCGTATCATACACGCTTTCCACGCTGAAGCAAAGACCCACAACAATGGGGTCTCTCCACCTGCCTTTAACCCGAACAATATGAATGCTGTGCCGCTGAACCTGCTCAACCTCAAC…
CYVCV	CA9	OQ418495	WRN92066	CA9	COAT PROTEIN	USA: California	mexican lime	MSFDYTHPLYRSYPFPHYCEFDRHQLCDHHPVLKPPTHKPSAPNSLMSTDNNKGKQPLHPTPSGPNDTTP_x000B_KPIPVPTPSATPTAAGKENQEPIEKRIIHAFHAEAKTHNNGVSPPAFNPNNMNAVPLNLLNLNLRYSPVT_x000B_NSIANPKQTEAIGKAWVRILNIDPANVFLYAIDLARACADAGSSPEADIIGANEDLNPVVERNALALVVR_x000B_DFCPLRAFCAYYSRVVWNLMIKADQPPANWMKSGVDENAKFAAFDFFHGILSPASLYVPLERHPTSAERI_x000B_ANQAMFAVKIANSPGNGTDLTMDHVAFTKGRTTHSSGLRPTPFNI_x000B_	ATGAGCTTCGACTACACTCACCCTCTCTACCGCAGCTATCCATTTCCACATTACTGCGAGTTCGACCGGCACCAACTCTGCGACCATCATCCAGTACTCAAACCTCCAACTCACAAACCCAGCGCCCCGAACTCTCTCATGTCTACCGACAACAACAAGGGCAAACAACCACTTCACCCGACACCTTCGGGCCCTAACGACACGACCCCGAAACCTATCCCTGTACCCACTCCCTCAGCTACGCCCACAGCTGCAGGTAAGGAAAACCAAGAGCCCATTGAAAAGCGTATCATACACGCTTTCCACGCTGAAGCAAAGACCCACAACAATGGGGTCTCTCCACCTGCCTTTAACCCGAACAATATGAATGCTGTGCCGCTGAACCTGCTCAACCTCAAC…
CYVCV	CA8	OQ418494	WRN92060		COAT PROTEIN	USA: California	lemon	MSFDYTHPLYRSYPFPHYCEFDRHQLCDHHPVLKPPTHKPSAPNSLMSTDNNKGKQPLHPTPSGPNDTTP_x000B_KPIPVPTPSATPTAAGKENQEPIEKRIIHAFHAEAKTHNNGVSPPAFNPNNMNAVPLNLLNLNLRYSPVT_x000B_NSIANPKQTEAIGKAWVRILNIDPANVFLYAIDLARACADAGSSPEADIIGANEDLNPVVERNALALVVR_x000B_DFCPLRAFCAYYSRVVWNLMIKADQPPANWMKSGVDENAKFAAFDFFHGILSPASLYVPLERHPTSAERI_x000B_ANQAMFAVKIANSPGNGTDLTMDHVAFTKGRTTHSSGLRPTPFNI	ATGAGCTTCGACTACACTCACCCTCTCTACCGCAGCTATCCATTTCCACATTACTGCGAGTTCGACCGGCACCAACTCTGCGACCATCATCCAGTACTCAAACCTCCAACTCACAAACCCAGCGCCCCGAACTCTCTCATGTCTACCGACAACAACAAGGGCAAACAACCACTTCACCCGACACCTTCGGGCCCTAACGACACGACCCCGAAACCTATCCCTGTACCCACTCCCTCAGCTACGCCCACAGCTGCAGGTAAGGAAAACCAAGAGCCCATTGAAAAGCGTATCATACACGCTTTCCACGCTGAAGCAAAGACCCACAACAATGGGGTCTCTCCACCTGCCTTTAACCCGAACAATATGAATGCTGTGCCGCTGAACCTGCTCAACCTCAAC…
CYVCV	AY221	MW429491	WBG00091		COAT protein	China: Anyue, Sichuan	Eureka lemon	MSFDYTHPLYRSYPFPHYCEFDRHQLCDHHPVLKPPTHKPSAPNSLMSTDDNKGKQPLHPTPSGPNDTTP_x000B_KPIPVPTPSITPTAAGKENQEPIEKRITHAFHAEAKTHNNGVSPPAFNPNNMNAVPLNLLNLNLRYSPVT_x000B_NSIANPKQTEAIGKAWVRILNIDPANVFLYAIDLARACADAGSSPEADIIGANEDLNPVVERNALALVVR_x000B_DFCPLRAFCAYYSRVVWNLMIKADQPPANWMKSGVDENAKFAAFDFFHGILSPASLYVPLERHPTSAERI_x000B_ANQAMFAVKIANAPGNGTDLTMDHVAFTKGRTTQHSGLRPTPFNI_x000B_	ATGAGCTTCGACTACACTCACCCTCTCTACCGCAGCTATCCATTTCCACACTACTGCGAGTTCGACCGGCACCAACTCTGCGACCATCATCCAGTACTCAAACCTCCAACGCACAAACCCAGCGCCCCGAACTCTCTCATGTCTACCGACGACAACAAGGGCAAACAACCACTTCACCCGACACCTTCGGGCCCTAACGACACGACCCCGAAACCTATCCCTGTACCCACTCCCTCAATTACGCCCACAGCTGCAGGTAAGGAAAACCAAGAGCCCATCGAAAAGCGTATCACACACGCTTTCCACGCTGAAGCAAAAACCCACAACAATGGGGTCTCTCCACCTGCCTTCAACCCGAACAACATGAATGCTGTGCCGCTGAACCTGCTCAACCTCAAC…
CYVCV	AY212	MW429490	WBG00085	AY212	coat protein	China: Anyue, Sichuan	Eureka lemon	MSFDYTHPLYRSYPFPHYCEFDRHQLCDHHPVLKPPTHKPSAPNSLMSTDDNKGKQPLHPTPSGPNDTTP_x000B_KPIPVPTPSITPTAAGKENQEPIEKRITHAFHAEAKTHNNGVSPPAFNPNNMNAVPLNLLNLNLRYSPVT_x000B_NSIANPKQTEAIGKAWVRILNIDPANVFLYAIDLARACADAGSSPEADIIGANEDLNPVVERNALALVVR_x000B_DFCPLRAFCAYYSRVVWNLMIKADQPPANWMKSGVDENAKFAAFDFFHGILSPASLYVPLERHPTSAERI_x000B_ANQAMFAVKIANAPGNGTDLTMDHVAFTKGRTTQHSGLRPTPFNI_x000B_	ATGAGCTTCGACTACACTCACCCTCTCTACCGCAGCTATCCATTTCCACACTACTGCGAGTTCGACCGGCACCAACTCTGCGACCATCATCCAGTACTCAAACCTCCAACGCACAAACCCAGCGCCCCGAACTCTCTCATGTCTACCGACGACAACAAGGGCAAACAACCACTTCACCCGACACCTTCGGGCCCTAACGACACGACCCCGAAACCTATCCCTGTACCCACTCCCTCAATTACGCCCACAGCTGCAGGTAAGGAAAACCAAGAGCCCATCGAAAAGCGTATCACACACGCTTTCCACGCTGAAGCAAAAACCCACAACAATGGGGTCTCTCCACCTGCCTTCAACCCGAACAACATGAATGCTGTGCCGCTGAACCTGCTCAACCTCAAC…
CYVCV	YN	KP313242	AJO26415		COAT Protein	China: Yunnan	Eureka lemon	MSFDYTHPLYRSYPFPHYCEFDRHQLCDHHPVLKPPTHKPSAPNSLMSTDDNKGKQPLHPTPSGPNDTTP_x000B_KPIPVPTPSVTPTAAGKENQEPIEKRITHAFHAEAKTHNNGVSPPAFNPNNMNAVPLNLLNLNLRYSPVT_x000B_NSIANPKQTEAIGKAWVRILNIDPANVFLYAIDLARACADAGSSPEADIIGANEDLNPVVERNALALVVR_x000B_DFCPLRAFCAYYSRVVWNLMIKADQPPANWMKSGVDENAKFAASDFFHGILSPASLYVPLERHPTSAERI_x000B_ANQAMFAVKIANAPGNGTDLTMDHVAFTKGRTTQHSGLRPTPFNI	ATGAGCTTCGACTACACTCACCCTCTCTACCGCAGCTATCCATTTCCACACTACTGCGAGTTCGACCGGCACCAACTCTGCGACCATCATCCAGTACTCAAACCTCCAACGCACAAACCCAGCGCCCCGAACTCTCTCATGTCTACCGACGACAACAAGGGCAAACAACCACTTCACCCGACACCTTCGGGCCCTAACGACACGACCCCGAAACCTATCCCTGTACCCACTCCCTCAGTTACGCCCACAGCTGCAGGTAAGGAAAACCAAGAGCCCATCGAAAAGCGTATCACACACGCTTTCCACGCTGAAGCAAAAACCCACAACAATGGGGTCTCTCCACCTGCCTTCAACCCGAACAACATGAATGCTGTGCCGCTGAACCTGCTCAACCTCAAC…
CYVCV	AY204	MG878869	AWJ64286		COAT PROTEIN	China: Sichuan	Citrus limon	MSFDYTHPLYRSYPFPHYCEFDRHQLCDHHPVLKPPTHKPSAPNSLMSTDDNKGKQPLHPTPSGPNDTTP_x000B_KPIPVPTPSITPTAAGKENQEPIEKRITHAFHAEAKTHNNGVSPPAFNPNNMNAVPLNLLNLNLRYSPVT_x000B_NSIANPKQTEAIGKAWVRILNIDPANVFLYAIDLARACADAGSSPEADIIGANEDLNPVVERNALALVVR_x000B_DFCPLRAFCAYYSRVVWNLMIKADQPPANWMKSGVDENAKFAAFDFFHGILSPASLYVPLERHPTSAERI_x000B_ANQAMFAVKIANAPGNGTDLTMDHVAFTKGRTTQHSGLRPTPFNI_x000B_	ATGAGCTTCGACTACACTCACCCTCTCTACCGCAGCTATCCATTTCCACACTACTGCGAGTTCGACCGGCACCAACTCTGCGACCATCATCCAGTACTCAAACCTCCAACGCACAAACCCAGCGCCCCGAACTCTCTCATGTCTACCGACGACAACAAGGGCAAACAACCACTTCACCCGACACCTTCGGGCCCTAACGACACGACCCCGAAACCTATCCCTGTACCCACTCCCTCAATTACGCCCACAGCTGCAGGTAAGGAAAACCAAGAGCCCATCGAAAAGCGTATCACACACGCTTTCCACGCTGAAGCAAAAACCCACAACAATGGGGTCTCTCCACCTGCCTTCAACCCGAACAACATGAATGCTGTGCCGCTGAACCTGCTCAACCTCAAC…
CYVCV	AY112	MW429487	WBG00067	AY112	COAT PROTEIN	China: Anyue, Sichuan	Eureka lemon	MSFDYTHPLYRSYPFPHYCEFDRHQLCDHHPVLKPPTHKPSAPNSLMSTDDNKGKQPLHPTPSGPNDTTP_x000B_KPIPVPTPSITPTAAGKENQEPIEKRITHAFHAEAKTHNNGVSPPAFNPNNMNAVPLNLLNLNLRYSPVT_x000B_NSIANPKQTEAIGKAWVRILNIDPANVFLYAIDLARACADAGSSPEADIIGANEDLNPVVERNALALVVR_x000B_DFCPLRAFCAYYSRVVWNLMIKADQPPANWMKSGVDENAKFAAFDFFHGILSPASLYVPLERHPTSAERI_x000B_ANQAMFAVKIANAPGNGTDLTMDHVAFTKGRTTQHSGLRPTPFNI_x000B_	ATGAGCTTCGACTACACTCACCCTCTCTACCGCAGCTATCCATTTCCACACTACTGCGAGTTCGACCGGCACCAACTCTGCGACCATCATCCAGTACTCAAACCTCCAACGCACAAACCCAGCGCCCCGAACTCTCTCATGTCTACCGACGACAACAAGGGCAAACAACCACTTCACCCGACACCTTCGGGCCCTAACGACACGACCCCGAAACCTATCCCTGTACCCACTCCCTCAATTACGCCCACAGCTGCAGGTAAGGAAAACCAAGAGCCCATCGAAAAGCGTATCACACACGCTTTCCACGCTGAAGCAAAAACCCACAACAATGGGGTCTCTCCACCTGCCTTCAACCCGAACAACATGAATGCTGTGCCGCTGAACCTGCTCAACCTCAAC…
CYVCV	AY132	MW429488	WBG00073	AY132	COAT PROTEIN	China: Anyue, Sichuan	Eureka lemon	MSFDYTHPLYRSYPFPHYCEFDRHQLCDHHPVLKPPTHKPSAPNSLMSTDDNKGKQPLHPTPSGPNDTTP_x000B_KPIPVPTPSITPTAAGKESQEPIEKRITHAFHAEAKTHNNGVSPPAFNPNNMNAVPLNLLNLNLRYSPVT_x000B_NSIANPKQTEAIGKAWVRILNIDPANVFLYAIDLARACADAGSSPEADIIGANEDLNPVVERNALALVVR_x000B_DFCPLRAFCAYYSRVVWNLMIKADQPPANWMKSGVDENAKFAAFDFFHGILSPASLYVPLERHPTSAERI_x000B_ANQAMFAVKIANAPGNGTDLTMDHIAFTKGRTTQHSGLRPTPFNI	ATGAGCTTCGACTACACTCACCCTCTCTACCGCAGCTATCCATTTCCACACTACTGCGAGTTCGACCGGCACCAACTCTGCGACCATCATCCAGTACTCAAACCTCCAACGCACAAACCCAGCGCCCCGAACTCTCTCATGTCTACCGACGACAACAAGGGCAAACAACCACTTCACCCGACACCTTCGGGCCCTAACGACACGACCCCGAAACCTATCCCTGTACCCACTCCCTCAATTACGCCCACAGCTGCAGGTAAGGAAAGCCAAGAGCCCATCGAAAAGCGTATCACACACGCTTTCCACGCTGAAGCAAAAACCCACAACAATGGGGTCTCTCCACCTGCCTTCAACCCGAACAACATGAATGCTGTGCCGCTGAACCTGCTCAACCTCAAC…
CYVCV	AY142	MW429489	WBG00079	AY142	COAT PROTEIn	China: Anyue, Sichuan	Eureka lemon	MSFDYTHPLYRSYPFPHYCEFDRHQLCDHHPVLKPPTHKPSAPNSLMSTDDNKGKQPLHPTPSGPNDTTP_x000B_KPIPVPTPSVTPTAAGKESQEPIEKRITHAFHAEAKTHNNGVSPPAFNPNNMNAVPLNLLNLNLRYSPVT_x000B_NSIANPKQTEAIGKAWVRILNIDPANVFLYAIDLARACADAGSSPEADIIGANEDLNPVVERNALALVVR_x000B_DFCPLRAFCAYYSRVVWNLMIKADQPPANWMKSGVDENAKFAAFDFFHGILSPASLYVPLERHPTSAERI_x000B_ANQAMFAVKIANAPGNGTDLTMDHIAFTKGRTTQHSGLRPTPFNI	ATGAGCTTCGACTACACCCACCCTCTCTACCGCAGCTATCCATTTCCACACTACTGCGAGTTCGACCGGCACCAACTCTGCGACCATCATCCAGTACTCAAACCTCCAACGCACAAACCCAGCGCCCCGAACTCTCTCATGTCTACCGACGACAACAAGGGCAAACAACCACTTCACCCGACACCTTCGGGCCCTAACGACACGACCCCGAAACCTATCCCTGTACCCACTCCCTCAGTTACGCCCACAGCTGCAGGTAAGGAAAGCCAAGAGCCCATCGAAAAGCGTATCACACACGCTTTCCACGCTGAAGCAAAAACCCACAACAATGGGGTCTCTCCACCTGCCTTCAACCCGAACAACATGAATGCTGTGCCGCTGAACCTGCTCAACCTCAAC…
CYVCV	RL	KP120977	AKG26806	RL	COAT PROTEIN	China	Citrus limon (eureka lemon)	MSFDYTHPLYRSYPFPHYCEFDRHQLCDHHPVLKPPTHKPSAPNSLMSTDDNKGKQPLHPTPSGPNDTTP_x000B_KPIPVPTPSVTPTAAGKESQEPIEKRITHAFHAEAKTHNNGVSPPAFNPNNMNAVPLNLLNLNLRYSPVT_x000B_NSIANPKQTEAIGKAWVRILNIDPANVFLYAIDLARACADAGSSPEADIIGANEDLNPVVERNALALVVR_x000B_DFCPLRAFCAYYSRVVWNLMIKADQPPANWMKSGVDENAKFAAFDFFHGILSPASLYVPLERHPTSAERI_x000B_ANQAMFAVKIANAPGNGTDLTMDHIAFTKGRTTQHSGLRPTPFNI	ATGAGCTTCGACTACACCCACCCTCTCTACCGCAGCTATCCATTTCCACACTACTGCGAGTTCGACCGGCACCAACTCTGCGACCATCATCCAGTACTCAAACCTCCAACGCACAAACCCAGCGCCCCGAACTCTCTCATGTCTACCGACGACAACAAGGGCAAACAACCACTTCACCCGACACCTTCGGGCCCTAACGACACGACCCCGAAACCTATCCCTGTACCCACTCCCTCAGTTACGCCTACAGCTGCAGGTAAGGAAAGCCAAGAGCCCATCGAAAAGCGTATCACACACGCTTTCCACGCTGAAGCAAAAACCCACAACAATGGGGTCTCTCCACCTGCCTTCAACCCGAACAACATGAATGCTGTGCCGCTGAACCTGCTCAACCTCAAC…
CYVCV	YN	KP313242	AJO26411		RDRP (PARTIAL)	China: Yunnan	Eureka lemon	MATIRGAIERITDTTVRTTLQEEACRQIRAELKTVEHINRYAIQPDAADALEHLGIGSNPFSVALHTHGACKAIENQLLYVVGTLLPKERVTMLFLKKSKLNIMKRCPKFQDIFLNQHIEPRDVSRYCDFNVQSTSTSIPTRTAYISDTLHFMDRRDLVRLFLNSPNLETLYATIVLPVEAAYKQPSRYPEIYQINYDFDGFQYIPGGHGGGAYHHEFEQLQWLDTGHIHWRGPDCKEIRMTITAQMLESLGANHLFCFKRGKLLTPRVRTFGRDTQ_x000B__x000B_	ATGGCCACTATTAGGGGTGCCATCGAACGCATTACAGACACCACCGTACGCACTACACTC CAAGAGGAGGCATGCCGCCAAATACGCGCTGAACTTAAAACCGTCGAACACATCAACCGT TACGCTATACAGCCTGACGCCGCCGACGCACTCGAACACCTAGGCATTGGTTCTAACCCC TTCTCTGTGGCACTGCACACGCACGGTGCCTGCAAAGCGATTGAGAACCAATTACTCTAT GTAGTTGGTACCTTACTCCCAAAAGAACGTGTCACCATGCTCTTCCTTAAGAAAAGCAAG CTCAACATCATGAAACGCTGCCCTAAATTCCAAGACATCTTCCTGAACCAACATATTGAG CCACGCGACGTTTCTAGGTACTGCGACTTTAAC…
CYVCV	GX-GXP	KX156741	ASK39478		COAT PROTEIN	China	pummelo	MSFDYTHPLYRSYPFPHYCEFDRHQLCDHHPVLKPPTHKPSAPNSLMSTNDNKGKGPLHPTPSGPNDTTP_x000B_KPIPVPTPSVTPTAAGKENQEPIEKRITHAFHAEAKTHNNGVSPPAFNPNNMNAVPLNLLNLNLRYSPVT_x000B_NSIANPKQTEAIGKAWVRILNIDPANVFLYAIDLARACADAGSSPEADIIGANEDLNPVVERNALALVVR_x000B_DFCPLRAFCAYYSRVVWNLMIKADQPPANWMKSGVDENAKFAAFDFFHGILSPASLYVPLERHPTSAERI_x000B_ANQAMFAVKIANAPGNGTDLTMDHVAFTKGRTTQHSGLRPTPFNI	ATGAGCTTCGACTACACTCACCCTCTCTACCGCAGCTATCCATTTCCACACTACTGCGAG TTCGACCGGCACCAACTCTGCGACCATCATCCAGTACTCAAACCTCCAACTCACAAACCC AGCGCCCCGAACTCTCTCATGTCTACCAACGACAACAAGGGCAAAGGACCACTTCACCCG ACACCTTCGGGCCCTAACGACACGACCCCGAAACCTATCCCCGTACCCACTCCCTCAGTT ACGCCCACAGCTGCAGGTAAGGAAAACCAAGAGCCCATCGAAAAGCGTATCACACACGCT TTCCACGCTGAAGCAAAAACCCACAACAATGGGGTCTCTCCACCTGCCTTTAACCCGAAC AACATGAATGCTGTGCCGCTGAACCTGCTCAAC…
CYVCV	GX-GXP	KX156741	ASK39474		RdRP (Partial)	China	pummelo	MATIRGAIERITDTTVRTTLQEEACRQIRAELKNVEHINRYAIQPDAADALEHLGIGSNPFSVALHTHGACKAIENQLLYVVGTLLPKERVTMLFLKKSKLNIMKRCPKFQDIFLNQHIEPRDVSRYCDFNVQSTSTSIPTRTAYISDTLHFMDRRDLVRLFLNSPNLETLYATIVLPVEAAYKQPSRYPEIYQINYDFDGFQYIPGGHGGGAYHHEFEQLQWLDTGHIHWRGPDCKEIRMTITAQMLESLGANHLFCFKRGKLLTPRVRTFGRDTQ_x000B__x000B_	ATGGCCACTATTAGGGGTGCCATCGAACGCATTACAGACACCACCGTACGCACTACACTT CAAGAGGAGGCATGCCGCCAAATACGCGCTGAACTTAAAAACGTCGAACACATCAACCGT TACGCTATACAGCCTGACGCCGCCGACGCACTCGAACACCTAGGCATTGGTTCTAACCCC TTCTCTGTGGCACTGCACACACACGGTGCCTGCAAAGCGATTGAGAACCAATTACTCTAT GTAGTTGGTACCTTACTCCCAAAAGAACGTGTCACCATGCTCTTCCTTAAGAAAAGCAAG CTCAACATCATGAAACGCTGCCCTAAATTCCAAGACATCTTCCTGAACCAACATATTGAA CCACGCGACGTTTCTAGGTACTGCGACTTTAAC…
CYVCV	JX-NH	KX156747	ASK39514	JX-NH	COAT PROTEIN	China	sweet orange	MSFDYTHPLYRSYPFPHYCEFDRHQLCDHHPILKPPTHKPSAPNSLMSTNDNKGKEPLHPTPSGPNDTTP_x000B_KPIPVPTPSVTPTAAGKENQEPIEKRITHAFHAEAKTHNNGVSPPAFNPNNMNAVPLNLLNLNLRYSPVT_x000B_NSIANPKQTEAIGKAWVRILNIDPANVFLYAIDLARACADAGSSPEADIIGANEDLNPVVERNALALVVR_x000B_DFCPLRAFCAYYSRVVWNLMIKADQPPANWMKSGVDENAKFAAFDFFHGILSPASLYVPLERHPTSAERI_x000B_ANQAMFAVKIANAPGNGTYLTMDHVAFTKGRTTQHSGLRPTPFNI	ATGAGCTTCGACTACACTCACCCTCTCTACCGCAGCTATCCATTTCCACACTACTGCGAGTTCGACCGGCACCAACTCTGCGACCATCATCCAATACTCAAACCTCCAACTCACAAACCCAGCGCCCCGAACTCTCTCATGTCTACCAACGACAACAAGGGCAAAGAACCACTTCACCCGACACCTTCGGGCCCTAACGACACGACCCCGAAACCTATCCCCGTACCCACTCCCTCAGTTACGCCCACAGCTGCAGGTAAGGAAAACCAAGAGCCCATCGAAAAGCGTATCACACACGCTTTCCACGCTGAAGCAAAAACCCACAACAATGGGGTCTCTCCACCTGCCTTTAACCCGAACAACATGAATGCTGTGCCGCTGAACCTGCTCAACCTCAAC…
CYVCV	BJ-WG	MK415927	QIN54976		COAT PROTEIN	China: Yunnan	Or	MSFDYTHPLYRSYPFPHYCEFDRHQLCDHHPVLKPPTHKPSAPNSLMSTDNNKGKQPLHPTPSDPNDTTP_x000B_KPIPVPTPSVTPTAAGKENQEPIEKRITHAFHAEAKTHNNGVSPPAFNPNNMNAVPLNLLNLNLRYSPVT_x000B_NSIANPKQTEAIGKAWVRILNIDPANVFLYAIDLARACADAGSSPEADIIGANEDLNPVVERNALALVVR_x000B_DFCPLRAFCAYYSRVVWNLMIKADQPPANWMKSGVDENAKFAAFDFFHGILSPASLYVPLERHPTTAERI_x000B_ANQAMFAVKIANAPGNGTDLTMDHVAFTKGRTTHHSGLRPTPFNI	ATGAGCTTCGACTACACTCACCCTCTCTACCGCAGCTATCCATTTCCACACTACTGCGAGTTCGACCGGCACCAACTCTGCGACCATCATCCAGTACTCAAACCTCCAACTCACAAACCCAGCGCCCCGAACTCTCTAATGTCTACCGACAATAACAAGGGCAAACAACCACTTCACCCGACACCTTCGGACCCTAACGACACGACCCCGAAACCTATCCCTGTACCCACTCCCTCAGTTACGCCCACAGCTGCAGGTAAGGAAAACCAAGAGCCCATCGAAAAGCGTATCACACACGCTTTCCACGCTGAAGCAAAAACCCACAACAATGGGGTCTCTCCACCTGCCTTTAACCCGAACAATATGAATGCTGTGCCGCTGAACCTGCTCAACCTCAAC…
CYVCV	GD-JG	KX156738	ASK39460	GD-JG	COAT PROTEIN	China	jiaogan	MSFDYTHPLYRSYPFPHYCEFDRHQLCDHHPVLKPPTHKPSAPNSLMSTNDNKGKEPLHPTPSGPNDTTP_x000B_KPIPVPTPSVTPTAAGKENQEPIEKRITHAFHAEAKTHNNGVSPPAFNPNNMNAVPLNLLNLNLRYSPVT_x000B_NSIANPKQTEAIGKAWVRILNIDPANVFLYAIDLARACADAGSSPEADIIGANEDLNPVVERNALALVVR_x000B_DFCALRAFCAYYSRVVWNLMIKADQPPANWMKSGVDENAKFAAFDFFHGILSPASLYVPLERHPTSAERI_x000B_ANQAMFAVKIANAPGNGTDLTMDHVAFTKGRTTQHSGLRPTPFNI_x000B_	ATGAGCTTCGACTACACTCACCCTCTCTACCGCAGCTATCCATTTCCACACTACTGCGAGTTCGACCGGCACCAACTCTGCGACCATCATCCAGTACTCAAACCTCCAACTCACAAACCCAGCGCCCCGAACTCTCTCATGTCTACCAACGACAACAAGGGCAAAGAACCACTTCACCCGACACCTTCGGGCCCTAACGACACGACCCCGAAACCTATCCCCGTACCCACTCCCTCAGTTACGCCCACAGCTGCAGGTAAGGAAAACCAAGAGCCCATCGAAAAGCGTATCACACACGCTTTCCACGCTGAAGCAAAAACCCACAACAATGGGGTCTCTCCACCTGCCTTTAACCCGAACAACATGAATGCTGTGCCGCTGAACCTGCTCAACCTCAAC…
CYVCV	SH01	MT780546	QZN83553		COAT PROTEIN	China	citrus	MSFDYTHPLYRSYPFPHYCEFDRHQLCDHHPALKPPTHKPSAPNSLMSTDDNKGKQPLHPTPSGPNDTTP_x000B_KPIPVPTPSVTPTAAGKENQEPIEKRITHAFHAEAKTHNNGVSPPAFNPNNMNAVPLNLLNLNLRYSPVT_x000B_NSIANPKQTEAIGKAWVRILNIDPANVFLYAIDLARACADAGSSPEADIIGANEDLNPVVERNALALVVR_x000B_DFCPLRAFCAYYSRVVWNLMIKADQPPANWMKSGVDENAKFAAFDFFHGILSPASLYVPLERHPTSAERI_x000B_ANQAMFAVKIANAPGNGTDLTMDHVAFTKGRTTQHSGLRPTPFNI	ATGAGCTTCGACTACACTCACCCTCTCTACCGCAGCTATCCATTTCCACACTACTGCGAGTTCGACCGGC_x000B_ACCAACTCTGCGACCATCACCCAGCACTCAAACCTCCAACTCACAAACCCAGCGCCCCGAACTCTCTCAT_x000B_GTCTACCGACGACAACAAGGGCAAACAACCACTTCACCCGACACCTTCGGGCCCTAACGACACGACCCCG_x000B_AAACCTATCCCTGTACCCACTCCCTCAGTTACGCCCACAGCTGCAGGTAAGGAAAACCAAGAGCCCATCG_x000B_AAAAGCGTATCACACACGCTTTCCACGCTGAAGCAAAAACCCACAACAATGGGGTCTCTCCACCCGCCTT_x000B_TAACCCGAACAACA…
CYVCV	ZJ_1	KY933794	AVQ67743		COAT PROTEIN	China	Citrus medica	MSFDYTHPLYRSYPFPHYCEFDRHQLCDHHPVLKPPTHKPSAPNSLMSTDNNKGKQPLHPTPSDPNDTTP_x000B_KPIPVPTPSVTPTAAGKENQEPTEKRIIHAFHAEAKTHNNGASPPAFNPNNMNAVPLNLLNLNLRYSPVT_x000B_NSIANPKQTEAIGKAWVRILNIDPANVFLYAIDLARACADAGSSPEADIIGANEDLNPVVERNALALVVR_x000B_DFCPLRAFCAYYSRVVWNLMIKADQPPANWMKSGVDENAKFAAFDFFHGILSPASLYVPLERHPTSAERI_x000B_ANQAMFAVKIANAPGNGTDLTMDHVAFTKGRTTQHPGLRPTPFNI	ATGAGCTTCGACTACACTCACCCTCTCTACCGCAGCTATCCATTTCCACACTACTGCGAGTTCGACCGGCACCAACTCTGCGACCATCATCCAGTACTCAAACCTCCAACTCACAAACCCAGCGCCCCGAACTCTCTCATGTCTACCGACAACAACAAGGGCAAACAACCACTTCACCCGACACCTTCGGACCCTAACGACACGACCCCGAAACCTATCCCTGTACCCACTCCCTCAGTTACGCCCACAGCTGCAGGTAAGGAAAACCAAGAGCCCACCGAAAAGCGTATCATACACGCTTTCCACGCTGAAGCAAAAACCCACAACAATGGGGCCTCTCCACCTGCCTTTAACCCGAACAATATGAATGCTGTGCCGCTGAACCTGCTCAACCTCAAC…
CYVCV	SC-NH	KX156749	ASK39526	SC-NH	COAT PROTEIN	China	sweet orange	MSFDYTHPLYRSYPFPHYCEFDRHQLCDHHPVLKPPTHKPSAPNSLMSTDNNKGKQPLHPTPSDPNDTTP_x000B_KPIPVPTPSVMPTAAGKENQEPIEKRITHAFHAEAKTHNNGVSPPAFNPNNMNAVPLNLLNLNLRYSPVT_x000B_NSIANPKQTEAIGKAWVRILNIDPANVFLYAIDLARACADAGSSPEADIIGANEDLNPVVERNALALVVR_x000B_DFCPLRAFCAYYSRVVWNLMIKADQPPANWMKSGVDENAKFAAFDFFHGILSPASLYVPLERHPTSAERI_x000B_ANQAMFAVKIANAPGNGTDLTMDHVAFTKGRTTQHSGLRPTPFNI	ATGAGCTTCGACTACACTCACCCTCTCTACCGCAGCTATCCATTTCCACACTACTGCGAGTTCGACCGGCACCAACTCTGCGACCATCATCCAGTACTCAAACCTCCAACTCACAAACCCAGCGCCCCGAACTCTCTCATGTCTACCGACAACAACAAGGGCAAACAACCACTTCACCCGACACCTTCGGACCCTAACGACACGACCCCGAAACCTATCCCTGTACCCACTCCCTCAGTTATGCCCACAGCTGCAGGTAAGGAAAACCAAGAGCCCATAGAAAAGCGTATTACACACGCTTTCCACGCTGAAGCAAAAACCCACAACAATGGGGTCTCTCCACCTGCCTTTAACCCGAACAACATGAATGCTGTGCCGCTGAACCTGCTCAACCTCAAC…
CYVCV	SC-EL	KX156748	ASK39520	SC-EL	COAT PROTEIN	Sichuan, China	lemon	MSFDYTHPLYRSYPFPHYCEFDRHQLCDHHPVLKPPTHKPSAPNSLMSTDNNKGKQPLHPTPSDPNDTTP_x000B_KPIPVPTPSVMPTAAGKENQEPIEKRITHAFHAEAKTHNNGVSPPAFNPNNMNAVPLNLLNLNLRYSPVT_x000B_NSIANPKQTEAIGKAWVRILNIDPANVFLYAIDLARACADAGSSPEADIIGANEDLNPVVERNALALVVR_x000B_DFCPLRAFCAYYSRVVWNLMIKADQPPANWMKSGVDENAKFAAFDFFHGILSPASLYVPLERHPTSAERI_x000B_ANQAMFAVKIANAPGNGTDLTMDHVAFTKGRTTQHSGLRPTPFNI	ATGAGCTTCGACTACACTCACCCTCTCTACCGCAGCTATCCATTTCCACACTACTGCGAGTTCGACCGGCACCAACTCTGCGACCATCATCCAGTACTCAAACCTCCAACTCACAAACCCAGCGCCCCGAACTCTCTCATGTCTACCGACAACAACAAGGGCAAACAACCACTTCACCCGACACCTTCGGACCCTAACGACACGACCCCGAAACCTATCCCTGTACCCACTCCCTCAGTTATGCCCACAGCTGCAGGTAAGGAAAACCAAGAGCCCATAGAAAAGCGTATTACACACGCTTTCCACGCTGAAGCAAAAACCCACAACAATGGGGTCTCTCCACCTGCCTTTAACCCGAACAACATGAATGCTGTGCCGCTGAACCTGCTCAACCTCAAC…
CYVCV	YN-XP	ON513420	WCR39905	YN-XP	COAT PROTEIN	China: Yunnan	Diaphorina citri	MSFDYTHPLYRSYPFPHYCEFDRHQLCDHHPVLKPPTHKPSAPNSLMSTDDNKGKQPLHPTPSGPNDTTP_x000B_KPIPVPTPSVTPTAAGKENQEPIEKRITHAFHAEAKTHNNGVSPPAFNPNNMNAVPLNLLNLNLRYSPVT_x000B_NSIANPKQTEAIGKAWVRILNIDPANVFLYAIDLARACADAGSSPEADIIGANEDLNPVVERNALALVVR_x000B_DFCPLRAFCAYYSRVVWNLMIKADQPPANWMKSGVDENAKFAAFDFFHGILSPASLYVPLERHPTSAERI_x000B_ANQAMFAVKIANAPGNGTDLTMDHVAFTKGRTTQHSGLRPTPFNT	ATGAGCTTCGACTACACTCACCCTCTCTACCGCAGCTATCCATTTCCACACTACTGCGAGTTCGACCGGCACCAACTCTGCGACCATCATCCAGTACTCAAACCTCCAACTCACAAACCCAGCGCCCCGAACTCTCTCATGTCTACCGACGACAACAAGGGCAAACAACCACTTCACCCGACACCCTCGGGCCCTAACGACACGACGCCGAAACCTATCCCTGTACCCACTCCCTCAGTTACGCCCACAGCTGCAGGTAAGGAAAACCAAGAACCCATCGAAAAGCGTATCACACACGCTTTCCACGCTGAAGCAAAAACCCACAACAATGGGGTCTCTCCACCTGCCTTTAACCCGAACAACATGAATGCTGTGCCGCTGAACCTGCTCAACCTCAAC…
CYVCV	BJ-HMR	MK415924	QIN54958		COAT PROTEIN	China: Yunnan	C. reticulata	MSFDYTHPLYRSYPFPHYCEFDRHQLCDHHPVLKPPTHKPSAPNSLMSTDNNKGKQPLHPTPSDPNDTAP_x000B_KPIPVPTPSVTPTAAGKENQEPIEKRITHAFHAEAKTHNNGVSPPAFNPNNMNAVPLNLLNLNLRYSPVT_x000B_NSIANPKQTEAIGKAWVRILNIDPANVFLYAIDLARACADAGSSPEADIIGANEDLNPVVERNALALVVR_x000B_DFCPLRAFCAYYSRVVWNLMIKADQPPANWMKSGVDENAKFAAFDFFHGILSPASLYVPLERHPTSAERI_x000B_ANQAMFAVKIANAPGNGTDLTMDHVAFTKGRTTQHSGLRPTPFNI_x000B_	ATGAGCTTCGACTACACTCACCCTCTCTACCGCAGCTATCCATTTCCACACTACTGCGAGTTCGACCGGCACCAACTCTGCGACCATCATCCAGTACTCAAACCTCCAACTCACAAACCCAGCGCCCCGAACTCTCTAATGTCTACTGACAATAACAAGGGCAAACAACCACTTCACCCGACACCTTCGGACCCTAACGACACGGCCCCAAAACCTATCCCTGTACCCACTCCCTCAGTTACGCCCACAGCTGCAGGTAAGGAAAACCAAGAGCCCATCGAAAAGCGTATCACACACGCTTTCCACGCTGAAGCAAAAACCCACAACAATGGGGTCTCTCCACCTGCCTTTAACCCGAACAATATGAATGCTGTGCCGCTGAACCTGCTCAACCTCAAC…
CYVCV	ZJ_4	KY933797	AVQ67761	ZJ_4	COAT PROTEIN	China	Citrus reticulata x Citrus sinensis	MSFDYTHPLYRSYPFPHYCEFDRHQLCDHHPVLKPPTHKPSAPNSLMSTDNNKGKQPLHPTPSDPNDTTP_x000B_KPIPVPTPSVTPTAAGKENQEPTEKRIIHAFHAEAKTHNNGVSPPAFNPNNMNAVPLNLLNLNLRYSPVT_x000B_NSIANPKQTEAIGKAWVRILNIDPANVFLYAIDLARACADAGSSPEADIIGANEDLNPVVERNALALVVR_x000B_DFCPLRAFCAYYSRVVWNLMIKADQPPANWMKSGVDENAKFAAFDFFHGILSPASLYVPLERHPTSAERI_x000B_ANQAMFAVKIANAPGNGTDLTMDHVAFTKGRTTQHSGLRPTPFNI	ATGAGCTTCGACTACACTCACCCTCTCTACCGCAGCTATCCATTTCCACACTACTGCGAGTTCGACCGGCACCAACTCTGCGACCATCATCCAGTACTCAAACCTCCAACTCACAAACCCAGCGCCCCGAACTCTCTCATGTCTACCGACAACAACAAGGGCAAACAACCACTTCACCCGACACCTTCGGACCCTAACGACACGACCCCGAAACCTATCCCTGTACCCACTCCCTCAGTTACGCCCACAGCTGCAGGTAAGGAAAACCAAGAGCCCACCGAAAAGCGTATCATACACGCTTTCCACGCTGAAGCAAAAACCCACAACAATGGGGTCTCTCCACCTGCCTTTAACCCGAACAATATGAATGCTGTGCCGCTGAACCTGCTCAACCTCAAC…
CYVCV	ZJ_3	KY933796	AVQ67755		COAT PROTEIN	China	Citrus reticulata x Citrus sinensis	MSFDYTHPLYRSYPFPHYCEFDRHQLCDHHPVLKPPTHKPSAPNSLMSTDNNKGKQPLHPTPSDPNDTTP_x000B_KPIPVPTPSVTPTAAGKENQEPTEKRIIHAFHAEAKTHNNGVSPPAFNPNNMNAVPLNLLNLNLRYSPVT_x000B_NSIANPKQTEAIGKAWVRILNIDPANVFLYAIDLARACADAGSSPEADIIGANEDLNPVVERNALALVVR_x000B_DFCPLRAFCAYYSRVVWNLMIKADQPPANWMKSGVDENAKFAAFDFFHGILSPASLYVPLERHPTSAERI_x000B_ANQAMFAVKIANAPGNGTDLTMDHVAFTKGRTTQHSGLRPTPFNI	ATGAGCTTCGACTACACTCACCCTCTCTACCGCAGCTATCCATTTCCACACTACTGCGAGTTCGACCGGCACCAACTCTGCGACCATCATCCAGTACTCAAACCTCCAACTCACAAACCCAGCGCCCCGAACTCTCTCATGTCTACCGACAACAACAAGGGCAAACAACCACTTCACCCGACACCTTCGGACCCTAACGACACGACCCCGAAACCTATCCCCGTACCCACTCCCTCAGTTACGCCCACGGCTGCAGGTAAGGAAAACCAAGAGCCCACCGAAAAGCGCATCATACACGCTTTCCACGCTGAAGCAAAAACCCACAACAATGGGGTCTCTCCACCTGCCTTCAACCCGAACAATATGAATGCTGTGCCGCTGAACCTGCTCAACCTCAAC…
CYVCV	ZJ_2	KY933795	AVQ67749		COAT PROTEIN	China	Citrus medica	MSFDYTHPLYRSYPFPHYCEFDRHQLCDHHPVLKPPTHKPSAPNSLMSTDNNKGKQPLHPTPSDPNDTTP_x000B_KPIPVPTPSVTPTAAGKENQEPTEKRIIHAFHAEAKTHNNGVSPPAFNPNNMNAVPLNLLNLNLRYSPVT_x000B_NSIANPKQTEAIGKAWVRILNIDPANVFLYAIDLARACADAGSSPEADIIGANEDLNPVVERNALALVVR_x000B_DFCPLRAFCAYYSRVVWNLMIKADQPPANWMKSGVDENAKFAAFDFFHGILSPASLYVPLERHPTSAERI_x000B_ANQAMFAVKIANAPGNGTDLTMDHVAFTKGRTTQHSGLRPTPFNI	ATGAGCTTCGACTACACTCACCCTCTCTACCGCAGCTATCCATTTCCACACTACTGCGAGTTCGACCGGCACCAACTCTGCGACCATCATCCAGTACTCAAACCTCCAACTCACAAACCCAGCGCCCCGAACTCTCTCATGTCTACCGACAACAACAAGGGCAAACAACCACTCCACCCGACACCTTCGGACCCTAACGACACGACCCCGAAACCTATCCCTGTACCCACTCCCTCAGTTACGCCCACAGCTGCAGGTAAGGAAAACCAAGAGCCCACCGAAAAGCGTATCATACACGCTTTCCACGCTGAAGCAAAAACCCACAACAATGGGGTCTCTCCACCTGCCTTTAACCCGAACAATATGAATGCTGTGCCGCTGAACCTACTCAACCTCAAC…
CYVCV	GJ1	OL581610	UYW66724	GJ1	COAT PROTEIN	South Korea	calamansi	MSFDYTHPLYRSYPFPHYCEFDRHQLCDHHPILKPPTHKPSAPNSLMSTDNDKGKQPLHPTPSGPNDTTP_x000B_KPIPVPTPSVTPTAAGKENQEPIEKRITHAFHAEAKTHNNGVSPPAFNPNNMNAVPLNLLNLNLRYSPVT_x000B_NSIANPKQTEAIGKAWVRILNIDPANVFLYAIDLARACADAGSSPEADIIGANEDLNPVVERNALALVVR_x000B_DFCPLRAFCAYYSRVVWNLMIKADQPPANWMKSGVDENAKFAAFDFFHGILSPASLYVPLERHPTSAERI_x000B_ANQAMFAVKIANAPGNGTDLTMDHVAFTKGRTTQHSGLRPTPFNI	ATGAGCTTCGACTACACTCACCCTCTCTACCGCAGCTATCCATTTCCACACTACTGTGAGTTCGACCGGCACCAACTCTGTGACCATCATCCAATACTCAAACCTCCAACTCACAAACCCAGCGCCCCAAACTCTCTCATGTCTACCGACAACGACAAGGGCAAACAACCACTCCACCCGACACCTTCGGGCCCTAACGACACGACCCCGAAACCTATCCCTGTACCCACTCCCTCAGTTACGCCCACAGCTGCAGGTAAGGAAAACCAGGAGCCCATCGAAAAGCGTATCACACACGCTTTCCACGCTGAAGCAAAAACCCACAACAATGGGGTCTCTCCACCTGCCTTTAACCCGAACAACATGAATGCTGTGCCGCTGAACCTGCTCAACCTCAAC…
CYVCV	GJ2	OL441344	UYW66709	GJ2	COAT PROTEIN	South Korea	persian lime	MSFDYTHPLYRSYPFPHYCEFDRHQLCDHHPILKPPTHKPSAPNSPMSTDNDKGKQPLHPTPSGPNDKTP_x000B_KPIPVPTPSVTPTAAGKENQEPIEKRITHAFHAEAKTHNNGVSPPAFNPNNMNAVPLNLLNLNLRYSPVT_x000B_NSIANPKQTEAIGKAWVRILNIDPANVFLYAIDLARACADAGSSPEADIIGANEDLNPVVERNALALVVR_x000B_DFCPLRAFCAYYSRVVWNLMIKADQPPANWMKSGVDENAKFAAFDFFHGILSPASLYVPLERHPTSAERI_x000B_ANQAMFAVKIANAPGNGTDLTMDHVAFTKGRTTQHSGLRPTPFNI	ATGAGCTTCGACTACACTCACCCTCTCTACCGCAGCTATCCATTTCCACACTACTGTGAGTTCGACCGGCACCAACTCTGTGACCATCATCCAATACTCAAACCTCCAACTCACAAACCCAGCGCCCCAAACTCTCCCATGTCTACCGACAACGACAAGGGCAAACAACCACTCCACCCGACACCTTCGGGCCCTAACGACAAGACCCCGAAACCTATCCCTGTACCCACTCCCTCAGTTACGCCCACAGCTGCAGGTAAGGAAAACCAGGAGCCCATCGAAAAGCGTATCACACACGCTTTCCACGCTGAAGCAAAAACCCACAACAATGGGGTCTCTCCACCTGCCTTTAACCCGAACAACATGAATGCTGTGCCGCTGAACCTGCTCAACCTCAAC…
CYVCV	GJ3	OQ174723	WIL10291	GJ3	COAT PROTEIN	South Korea	persian lime	MSFDYTHPLYRSYPFPHYCEFDRHQLCDHHPILKPPTHKPSAPNSLMSTDNDKGKQPLHPTPSGPNDTTP_x000B_KPIPVPTPSVTPTAAGKENQEPIEKRITHAFHAEAKTHNNGVSPPAFNPNNMNAVPLNLLNLNLRYSPVT_x000B_NSIANPKQTEAIGKAWVRILNIDPANVFLYAIDLARACADAGSSPEADIIGANEDLNPVVERNALALVVR_x000B_DFCPLRAFCAYYSRVVWNLMIKADQPPANWMKSGVDENAKFAAFDFFHGILSPASLYVPLERHPTSAERI_x000B_ANQAMFAVKIANAPGNGTDLTMDHVAFTKGRTAQHSGLRPTPFNI_x000B_	ATGAGCTTCGACTACACTCACCCTCTCTACCGCAGCTATCCATTTCCACACTACTGTGAGTTCGACCGGCACCAACTCTGTGACCATCATCCAATACTCAAACCTCCAACTCACAAACCCAGCGCCCCAAACTCTCTCATGTCTACCGACAACGACAAGGGCAAACAACCACTCCACCCGACACCTTCGGGCCCTAACGACACGACCCCGAAACCTATCCCTGTACCCACTCCCTCAGTTACGCCCACAGCTGCAGGTAAGGAAAACCAGGAGCCCATCGAAAAACGTATCACACACGCTTTCCACGCTGAAGCAAAAACCCACAACAATGGGGTCTCTCCACCTGCCTTTAACCCGAACAACATGAATGCTGTGCCGCTGAACCTGCTCAACCTCAAC…
CYVCV	GJ4	MT883230	UYW66718		COAT PROTEIN	South Korea	Citrus limon	MSFDYTHPLYRSYPFPHYCEFDRHQLCDHHPILKPPTHKPSAPNSLMSTDNDKGKQPLHPTPSGPNDTTP_x000B_KPIPVPTPSVTPTAAGKENQEPIEKRITHAFHAEAKTHNNGVSPPAFNPNNMNAVPLNLLNLNLRYSPVT_x000B_NSIANPKQTEAIGKAWVRILNIDPANVFLYAIDLARACADAGSSPEADIIGANEDLNPVVERNALALVVR_x000B_DFCPLRAFCAYYSRVVWNLMIKADQPPANWMKSGVDENAKFAAFDFFHGILSPASLYVPLERHPTSAERI_x000B_ANQAMFAVKIANAPGNGTDLTMDHVAFTKGRTTQHSGLRPTPFNI	ATGAGCTTCGACTACACTCACCCTCTCTACCGCAGCTATCCATTTCCACACTACTGTGAGTTCGACCGGCACCAACTCTGTGACCATCATCCAATACTCAAACCTCCAACTCACAAACCCAGCGCCCCAAACTCTCTCATGTCTACCGACAACGACAAGGGCAAACAACCACTCCACCCGACACCTTCGGGCCCTAACGACACGACCCCGAAACCTATCCCTGTACCCACTCCCTCAGTTACGCCCACAGCTGCAGGTAAGGAAAACCAAGAGCCCATCGAAAAGCGTATCACACACGCTTTCCACGCTGAAGCAAAAACCCACAACAATGGGGTCTCTCCACCTGCCTTTAACCCGAACAACATGAATGCCGTGCCGCTGAACCTGCTCAACCTCAAC…
CYVCV	JX-NF	KX156746	ASK39504	JX-NF	COAT PROTEIN	China	tangerine	MSFDYTHPLYRSYPFPHYCEFDRHQLCDHHPVLKPPTHKPSAPNSLMSTNDNKGKEPLHPIPSGPNDTTP_x000B_KPIPVPTPSVTPTAAGKENQEPIEKRITHAFHAEAKTHNNGVSPPAFNPNNMNAVPLNLLNLNLRYSPVT_x000B_NSIANPKQTEAIGKAWVRILNIDPANVFLYAIDLARACADAGSSPEADIIGANEDLNPVVERNALALVVR_x000B_DFCPLRAFCAYYSRVVWNLMIKADQPPANWMKSGVDENAKFAAFDFFHGILSPASLYVPLERHPTSAERI_x000B_ANQAMFAVKIANAPGNGTDLTMDHVAFTKGRTTQHSGLRPTPFNI	ATGAGCTTCGACTACACTCACCCTCTTTACCGCAGCTATCCATTTCCACACTACTGCGAGTTCGACCGGCACCAACTCTGCGACCATCATCCAGTACTCAAACCTCCAACTCACAAACCCAGCGCCCCGAACTCTCTCATGTCTACCAACGACAACAAGGGCAAAGAACCACTTCACCCGATACCTTCGGGCCCTAACGACACGACCCCGAAACCTATCCCCGTACCCACTCCCTCAGTTACGCCCACAGCTGCAGGTAAGGAAAACCAAGAGCCCATCGAAAAGCGTATCACACACGCTTTCCACGCTGAAGCAAAAACCCACAACAATGGGGTCTCTCCACCTGCCTTTAACCCGAACAACATGAATGCTGTGCCGCTGAACCTGCTCAACCTCAAC…
CYVCV	BJ-QPJ	MK415928	QIN54982	BJ-QPJ	COAT PROTEIN	China: Yunnan	Qingpiju	MSFDYTHPLYRSYPFPHYCEFDRHQLCDHHPVLKPPTHKPSTPNSLMSTDNNKGKQPLHPTPPDPNDTTA_x000B_KPIPVPTPSVTPTAAGKENQEPIEKRITHAFHAEAKTHNNGVSPPAFNPNNMNAVPLNLLNLNLRYSPVT_x000B_NSIANPKQTEAIGKAWVRILNIDPANVFLYAIDLARACADAGSSPEADIIGANEDLNPVVERNALALVVR_x000B_DFCPLRAFCAYYSRVVWNLMIKADQPPANWMKSGVDENAKFAAFDFFHGILSPASLYVPLERHPTSAERI_x000B_ANQAMFAVKIAXAPGNGTDLTMDHVAFTKGRTTQHSGLRPTPFNI_x000B_	ATGAGCTTCGACTACACTCACCCTCTCTACCGCAGCTATCCATTTCCACACTACTGCGAGTTCGACCGACACCAACTCTGCGACCATCATCCAGTACTCAAACCTCCAACTCACAAACCCAGCACCCCGAACTCTCTCATGTCTACCGACAACAACAAGGGCAAACAACCACTTCACCCGACACCCCCGGACCCTAACGACACGACCGCGAAACCTATCCCTGTACCCACTCCCTCAGTTACGCCCACAGCTGCAGGTAAGGAAAACCAAGAGCCCATCGAAAAGCGTATCACACACGCTTTCCACGCTGAAGCAAAAACCCACAACAATGGGGTCTCTCCACCTGCCTTTAACCCGAACAACATGAATGCTGTGCCGCTGAACCTGCTCAACCTCAAC…
CYVCV	CA2	OR670060	WVD52758		COAT PROTEIN	USA	Citrus x limon cv. Eureka Lemon	MSFDYTHPLYRSYPFPHYCEFDRHQLCDHHPVLKPPTHKPSAPNSLMSTDNNKGKQPLHPTPSGPNDTTP_x000B_KPIPVPTPSATPTAAGKENQEPIEKRITHAFHAEAKTHNNGVSPPAFNPNNMNAVPLNLLNLNLRYSPVT_x000B_NSIANPKQTEAIGKAWVRILNIDPANVFLYAIDLARACADAGSSPEADIIGANEDLNPVVERNALALVVR_x000B_DFCPLRAFCAYYSRVVWNLMIKADQPPANWMKSGVDENAKFAAFDFFHGILSPASLYVPLERHPTSAERI_x000B_ANQAMFAVKIANSPGNGTDLTMDHVAFTKGRTTHSSGLRPTPFNI	ATGAGCTTCGACTACACTCACCCTCTCTACCGCAGCTATCCATTTCCACATTACTGCGAGTTCGACCGGCACCAACTCTGCGACCATCATCCAGTACTCAAACCTCCAACTCACAAACCCAGCGCCCCGAACTCTCTCATGTCTACCGACAACAACAAGGGCAAACAACCACTTCACCCGACACCTTCGGGCCCTAACGACACGACCCCGAAACCTATCCCTGTACCCACTCCCTCAGCTACGCCCACAGCTGCAGGTAAGGAAAACCAAGAGCCCATTGAAAAGCGTATCACACACGCTTTCCACGCTGAAGCAAAGACCCACAACAATGGGGTCTCTCCACCTGCCTTTAACCCGAACAATATGAATGCTGTGCCGCTGAACCTGCTCAACCTCAAC…
CYVCV	CA20	OQ418505	WRN92122		COAT PROTEIN	USA: California	citron	MSFDYTHPLYRSYPFPHYCEFDRHQLCDHHPVLKPPTHKPSAPNSLMSTDNNKGKQPLHPTPSGPNDTTP_x000B_KPIPVPTPSATPTAAGKENQEPIEKRIIHAFHAEAKTHNNGVSPPAFNPNNMNAVPLNLLNLNLRYSPVT_x000B_NSIANPKQTEAIGKAWVRILNIDPANVFLYAIDLARACADAGSSPEADIIGANEDLNPVVERNALALVVR_x000B_DFCPLRAFCAYYSRVVWNLMIKADQPPANWMKSGVDENAKFAAFDFFHGILSPASLYVPLERHPTSAERI_x000B_ANQAMFAVKIANSPGNGTDLTMDHVAFTKGRTTHSSGLRPTPFNI_x000B_	ATGAGCTTCGACTACACTCACCCTCTCTACCGCAGCTATCCATTTCCACATTACTGCGAGTTCGACCGGCACCAACTCTGCGACCATCATCCAGTACTCAAACCTCCAACTCACAAACCCAGCGCCCCGAACTCTCTCATGTCTACCGACAACAACAAGGGCAAACAACCACTTCACCCGACACCTTCGGGCCCTAACGACACGACCCCGAAACCTATCCCTGTACCCACTCCCTCAGCTACGCCCACAGCGGCAGGTAAGGAAAACCAAGAGCCCATCGAAAAGCGTATCATACACGCTTTCCACGCTGAAGCAAAGACCCACAACAATGGGGTCTCTCCACCTGCCTTTAACCCGAACAATATGAATGCTGTGCCGCTGAACCTGCTCAACCTCAAC…
CYVCV	CA19	OQ418504	WRN92120	CA19	COAT PROTEIN	USA: California	bearss lime	MSFDYTHPLYRSYPFPHYCEFDRHQLCDHHPVLKPPTHKPSAPNSLMSTDNNKGKQPLHPTPSGPNDTTP_x000B_KPIPVPTPSATPTAAGKENQEPIEKRIIHAFHAEAKTHNNGVSPPAFNPNNMNAVPLNLLNLNLRYSPVT_x000B_NSIANPKQTEAIGKAWVRILNIDPANVFLYAIDLARACADAGSSPEADIIGANEDLNPVVERNALALVVR_x000B_DFCPLRAFCAYYSRVVWNLMIKADQPPANWMKSGVDENAKFAAFDFFHGILSPASLYVPLERHPTSAERI_x000B_ANQAMFAVKIANSPGNGTDLTMDHVAFTKGRTTHSSGLRPTPFNI	ATGAGCTTCGACTACACTCACCCTCTCTACCGCAGCTATCCATTTCCACATTACTGCGAGTTCGACCGGCACCAACTCTGCGACCATCATCCAGTACTCAAACCTCCAACTCACAAACCCAGCGCCCCGAACTCTCTCATGTCTACCGACAACAACAAGGGCAAACAACCACTTCACCCGACACCTTCGGGCCCTAACGACACGACCCCGAAACCTATCCCTGTACCCACTCCCTCAGCTACGCCCACAGCGGCAGGTAAGGAAAACCAAGAGCCCATCGAAAAGCGTATCATACACGCTTTCCACGCTGAAGCAAAGACCCACAACAATGGGGTCTCTCCACCTGCCTTTAACCCGAACAATATGAATGCTGTGCCGCTGAACCTGCTCAACCTCAAC…
CYVCV	CA1	OQ418489	WRN92030	CA1	COAT PROTEIn	USA: California	lemon	MSFDYTHPLYRSYPFPHYCEFDRHQLCDHHPVLKPPTHKPSAPNSLMSTDNNKGKQPLHPTPSGPNDTTP_x000B_KPIPVPTPSATPTAAGKENQEPIEKRITHAFHAEAKTHNNGVSPPAFNPNNMNAVPLNLLNLNLRYSPVT_x000B_NSIANPKQTEAIGKAWVRILNIDPANVFLYAIDLARACADAGSSPEADIIGANEDLNPVVERNALALVVR_x000B_DFCPLRAFCAYYSRVVWNLMIKADQPPANWMKSGVDENAKFAAFDFFHGILSPASLYVPLERHPTSAERI_x000B_ANQAMFAVKIANSPGNGTDLTMDHVAFTKGRTTHSSGLRPTPFNI	ATGAGCTTCGACTACACTCACCCTCTCTACCGCAGCTATCCATTTCCACATTACTGCGAGTTCGACCGGCACCAACTCTGCGACCATCATCCAGTACTCAAACCTCCAACTCACAAACCCAGCGCCCCGAACTCTCTCATGTCTACCGACAACAACAAGGGCAAACAACCACTTCACCCGACACCTTCGGGCCCTAACGACACGACCCCGAAACCTATCCCTGTACCCACTCCCTCAGCTACGCCCACAGCTGCAGGTAAGGAAAACCAAGAGCCCATTGAAAAGCGTATCACACACGCTTTCCACGCTGAAGCAAAGACCCACAACAATGGGGTCTCTCCACCTGCCTTTAACCCGAACAATATGAATGCTGTGCCGCTGAACCTGCTCAACCTCAAC…
CYVCV	CA13	OQ418498	WRN92080	CA13	COAT PROTEIN	USA: California	kumquat	MSFDYTHPLYRSYPFPHYCEFDRHQLCDHHPVLKPPTHKPSAPNSLMSTDNNKGKQPLHPTPSGPNDTTP_x000B_KPIPVPTPSATPTAAGKENQEPIEKRIIHAFHAEAKTHNNGVSPPAFNPNNMNAVPLNLLNLNLRYSPVT_x000B_NSIANPKQTEAIGKAWVRILNIDPANVFLYAIDLARACADAGSSPEADIIGANEDLNPVVERNALALVVR_x000B_DFCPLRAFCAYYSRVVWNLMIKADQPPANWMKSGVDENAKFAAFDFFHGILSPASLYVPLERHPTSAERI_x000B_ANQAMFAVKIANSPGNGTDLTMDHVAFTKGRTTHSSGLRPTPFNI_x000B_	ATGAGCTTCGACTACACTCACCCTCTCTACCGCAGCTACCCATTTCCACATTACTGCGAGTTCGACCGGCACCAACTCTGCGACCATCATCCAGTACTCAAACCTCCAACTCACAAACCCAGCGCCCCGAACTCTCTCATGTCTACCGACAACAACAAGGGCAAACAACCACTTCACCCGACACCTTCGGGCCCTAACGACACGACCCCGAAACCTATCCCTGTACCCACTCCCTCAGCTACGCCCACAGCTGCAGGTAAGGAAAACCAAGAGCCCATTGAAAAGCGTATCATACACGCTTTCCACGCTGAAGCAAAGACCCACAACAATGGGGTCTCTCCACCTGCCTTTAACCCGAACAATATGAATGCTGTGCCGCTGAACCTGCTCAACCTCAAC…
CYVCV	CA12	OQ418497	WRN92078	CA12	COAT PROTEIN	USA: California	kumquat	MSFDYTHPLYRSYPFPHYCEFDRHQLCDHHPVLKPPTHKPSAPNSLMSTDNNKGKQPLHPTPSGPNDTTP_x000B_KPIPVPTPSATPTAAGKENQEPIEKRIIHAFHAEAKTHNNGVSPPAFNPNNMNAVPLNLLNLNLRYSPVT_x000B_NSIANPKQTEAIGKAWVRILNIDPANVFLYAIDLARACADAGSSPEADIIGANEDLNPVVERNALALVVR_x000B_DFCPLRAFCAYYSRVVWNLMIKADQPPANWMKSGVDENAKFAAFDFFHGILSPASLYVPLERHPTSAERI_x000B_ANQAMFAVKIANSPGNGTDLTMDHVAFTKGRTTHSSGLRPTPFNI	ATGAGCTTCGACTACACTCACCCTCTCTACCGCAGCTATCCATTTCCACATTACTGCGAGTTCGACCGGCACCAACTCTGCGACCATCATCCAGTACTCAAACCTCCAACTCACAAACCCAGCGCCCCGAACTCTCTCATGTCTACCGACAACAACAAGGGCAAACAACCACTTCACCCGACACCTTCGGGCCCTAACGACACGACCCCGAAACCTATCCCTGTACCCACTCCCTCAGCTACGCCCACAGCTGCAGGTAAGGAAAACCAAGAGCCCATTGAAAAGCGTATCATACACGCTTTCCACGCTGAAGCAAAGACCCACAACAATGGGGTCTCTCCACCTGCCTTTAACCCGAACAATATGAATGCTGTGCCGCTGAACCTGCTCAACCTCAAC…
CYVCV	CA10	OQ418496	WRN92072	CA10	COAT PROTEIN	USA: California	grapefruit	MSFDYTHPLYRSYPFPHYCEFDRHQLCDHHPVLKPPTHKPSAPNSLMSTDNNKGKQPLHPTPSGPNDTTP_x000B_KPIPVPTPSATPTAAGKENQEPIEKRIIHAFHAEAKTHNNGVSPPAFNPNNMNAVPLNLLNLNLRYSPVT_x000B_NSIANPKQTEAIGKAWVRILNIDPANVFLYAIDLARACADAGSSPEADIIGANEDLNPVVERNALALVVR_x000B_DFCPLRAFCAYYSRVVWNLMIKADQPPANWMKSGVDENAKFAAFDFFHGILSPASLYVPLERHPTSAERI_x000B_ANQAMFAVKIANSPGNGTDLTMDHVAFTKGRTTHSSGLRPTPFNI_x000B_	ATGAGCTTCGATTACACTCACCCTCTCTACCGCAGCTATCCATTTCCACATTACTGCGAGTTCGACCGGCACCAACTCTGCGACCATCATCCAGTACTCAAACCTCCAACTCACAAACCCAGCGCCCCGAACTCTCTCATGTCTACCGACAACAACAAGGGCAAACAACCACTTCACCCGACACCTTCGGGCCCTAACGACACGACCCCGAAACCTATCCCTGTACCCACTCCCTCAGCTACGCCCACAGCTGCAGGTAAGGAAAACCAAGAGCCCATTGAAAAGCGTATCATACACGCTTTCCACGCTGAAGCAAAGACCCACAACAATGGGGTCTCTCCACCTGCCTTTAACCCGAACAATATGAATGCTGTGCCGCTGAACCTGCTCAACCTCAAC…
CYVCV	CA6	OQ418493	WRN92054		COAT PROTEIN	USA: California	lemon	MSFDYTHPLYRSYPFPHYCEFDRHQLCDHHPVLKPPTHKPSAPNSLMSTDNNKGKQPLHPTPSGPNDTTP_x000B_KPIPVPTPSATPTAAGKENQEPIEKRIIHAFHAEAKTHNNGVSPPAFNPNNMNAVPLNLLNLNLRYSPVT_x000B_NSIANPKQTEAIGKAWVRILNIDPANVFLYAIDLARACADAGSSPEADIIGANEDLNPVVERNALALVVR_x000B_DFCPLRAFCAYYSRVVWNLMIKADQPPANWMKSGVDENAKFAAFDFFHGILSPASLYVPLERHPTSAERI_x000B_ANQAMFAVKIANSPGNGTDLTMDHVAFTKGRTTHSSGLRPTPFNI	ATGAGCTTCGACTACACTCACCCTCTCTACCGCAGCTATCCATTTCCACATTACTGCGAGTTCGACCGGCACCAACTCTGCGACCATCATCCAGTACTCAAACCTCCAACTCACAAACCCAGCGCCCCGAACTCTCTCATGTCTACCGACAACAACAAGGGCAAACAACCACTTCACCCGACACCTTCGGGCCCTAACGACACGACCCCGAAACCTATCCCTGTACCCACTCCCTCAGCTACGCCCACAGCTGCAGGTAAGGAAAACCAAGAGCCCATTGAAAAGCGTATCATACACGCTTTCCACGCTGAAGCAAAGACCCACAACAATGGGGTCTCTCCACCTGCCTTTAACCCGAACAATATGAATGCTGTGCCGCTGAACCTGCTCAACCTCAAC…
CYVCV	RMGI	KT696511	AOO32386	RMGI	COAT PROTEIN	India	malta	MSFDYTHPLYRSYPFPHYCEFDRHLLCDHHPVLKPPTHKPSAPNSLMSTDNNKGKQPLHPTPSGPNDTTP_x000B_KPIPVPNPSATPTAAGKENQEPIEKRIIHAFHAEAKTHNNGVSPPAFNPNNMNAVPLNLLNLNLRYSPVT_x000B_NSIANPKQTEAIGKAWVRILNIDPANVFLYAIDLARACADAGSSPEADIIGANEDLNPVVERNALALVVR_x000B_DFCPLRAFCAYYSRVVWNLMIKADQPPANWMKSGVDENAKFAAFDFFHGILSPASLYVPLERHPTSAERI_x000B_ANQAMFAVKIANAPGNGTDLTMDHVAFTKGRTTQSSGLRPTPFNI	ATGAGCTTCGACTACACTCACCCTCTCTACCGCAGCTATCCATTTCCACATTACTGCGAGTTCGACAGGCACCTACTCTGCGACCATCATCCAGTACTCAAACCTCCAACTCACAAACCCAGTGCCCCGAACTCTCTCATGTCTACCGACAACAACAAGGGCAAACAACCACTTCACCCGACACCTTCGGGCCCTAACGACACGACCCCGAAACCTATCCCTGTACCCAATCCCTCAGCTACGCCCACAGCTGCAGGTAAGGAAAACCAAGAGCCCATCGAAAAGCGTATCATACACGCTTTCCACGCTGAAGCAAAAACCCACAACAATGGGGTCTCTCCACCTGCCTTCAACCCGAACAATATGAATGCTGTGCCGCTGAACCTGCTCAACCTCAAC…
CYVCV	CA18	OQ418503	WRN92114		COAT PROTEIN	USA: California	lemon	MSFDYTHPLYRSYPFPHYCEFDRHQLCDHHPALKPPTHRPSAPNSLMSTNDNKGKQPLHPTPSGPNDTTP_x000B_KPIPVPTPSATPTAAGKENQEPIEKRITHAFHAEAKTHNNGVSPPAFNPNNMNAVPLNLLNLNLRYSPVT_x000B_NSIANPKQTEAIGKAWVRILNIDPANVFLYAIDLARACADAGSSPEADIIGANEDLNPVVERNALALVVR_x000B_DFCPLRAFCAYYSRVVWNLMIKADQPPANWMKSGVDENAKFAAFDFFHGILSPASLYVPLERHPTSAERI_x000B_ANQAMFAVKIANAPGNGTDLTMDHVAFTKGRTTQTSGLRPTPFNI	ATGAGCTTCGACTACACTCACCCTCTCTACCGCAGCTATCCATTTCCACACTACTGTGAGTTCGACAGGCACCAACTCTGCGACCATCATCCAGCACTCAAACCTCCAACTCACAGACCCAGTGCCCCGAACTCTCTCATGTCTACCAACGACAACAAGGGCAAACAACCACTTCACCCGACACCTTCGGGCCCTAACGACACGACCCCGAAACCTATCCCTGTACCCACTCCCTCAGCTACGCCCACAGCCGCAGGTAAGGAAAACCAAGAGCCCATCGAAAAGCGTATCACACACGCTTTCCACGCTGAAGCAAAAACCCACAACAATGGGGTTTCTCCACCTGCCTTTAACCCGAACAATATGAACGCTGTGCCGCTGAACCTGCTCAACCTCAAC…
CYVCV	FRBI	KT696520	AOX15538		COAT PROTEIN	India: Fazilka	malta	MSFDYTHPLYRSYPFPHYCEFDRHLLCDHHPVLKPPTHKPSAPNSLMSTDNNKGKQPLHPTPSGPNDTTP_x000B_KPIPVPNPSATPTAAGKENQGPIEKRIIHAFHAEARTHNNGVSPPAFNPNNMNAVPLNLLNLNLRYSPVT_x000B_NSIANPKQTEAIGKAWVRILNIDPANVFLYAIDLARACADAGSSPEADIIGANEDLNPVVERNALALVVR_x000B_DFCPLRAFCAYYSRVVWNLVIKADQPPANWMKSGVDENAKFAAFDFFHGILSPASLYVPLERHPTSAERI_x000B_ANQAMFAVKIANAPGNGTDLTMDHVAFTKGRTTQSSGLRPTPFNI	ATGAGCTTCGACTACACTCACCCTCTCTACCGCAGCTATCCATTTCCACATTACTGCGAGTTCGACAGGC_x000B_ACCTACTCTGCGACCATCATCCAGTACTCAAACCTCCAACTCACAAACCCAGTGCCCCGAACTCTCTCAT_x000B_GTCTACCGACAACAACAAGGGCAAACAACCACTTCACCCGACACCTTCGGGCCCTAACGACACGACCCCG_x000B_AAACCTATCCCTGTACCCAATCCCTCAGCTACGCCCACAGCTGCAGGTAAGGAAAACCAAGGGCCCATCG_x000B_AAAAGCGTATCATACACGCTTTCCACGCTGAAGCAAGAACCCACAACAATGGGGTCTCTCCACCTGCCTT_x000B_CAACCCGAACAATA…
CYVCV	SMI	KT696519	AOX15537		COAT PROTEIN	India: SGNR	orange	MSFDYTHPLYRSYPFPHYCEFDRHRLCDHHPVLKPPTHKPSAPNSLMSTDDNKGKQPLHPTPSGPNDPTP_x000B_KPIPVLTPSATPTAAGKENQEPIEKRIIHAFHAEAKTHNNGVSPPAFNPNNMNAVPLNLLNLNLRYSPVT_x000B_NSIANPKQTEAIGKAWVRILNIDPANVFLYAIDLARACADAGSSPEADIIGANEDLNPVVERNALALVVR_x000B_DFCPLRAFCAYYSRVVWNLMIKADQPPANWMKSGVDENAKFAAFDFFHGILSPASLYVPLERHPTSAERI_x000B_ANQAMFAVKIANAPGNGTDLTMDHVAFTKGRTTQSSGLRPTPFNI	ATGAGCTTCGACTACACTCACCCTCTCTACCGCAGTTATCCATTCCCACACTACTGCGAGTTCGACCGGCACCGACTCTGCGACCATCACCCAGTACTCAAACCCCCAACTCACAAACCCAGTGCCCCGAACTCTCTCATGTCTACCGACGACAACAAGGGCAAACAACCACTTCACCCGACACCTTCGGGCCCTAACGACCCGACCCCGAAACCTATCCCTGTACTCACTCCCTCAGCTACGCCCACAGCTGCAGGTAAGGAAAACCAAGAGCCCATCGAAAAGCGTATCATACACGCTTTCCACGCTGAAGCAAAAACCCACAACAATGGGGTATCCCCACCTGCCTTCAACCCGAACAATATGAATGCTGTGCCGCTGAACCTGCTCAACCTCAAC…
CYVCV	FKI	KT696518	AOX15536		COAT PROTEIN	India: Fazilka	kinnow	MSFDYTHPLYRSYPFPHYCEFDRHLLCDHHPVLKPPTHKPSAPNSLMSTDNNKGKQPLHPTPSGPNDTTP_x000B_KPIPVPNPSATPTAAGKENQEPIEKRIIHAFHAEAKTHNNGVSPPAFNPNNMNAVPLNLLNLNLRYSPVT_x000B_NSIANPKQTEAIGKAWVRILNIDPANVFLYAIDLARACADAGSSPEADIIGANEDPNPVVERNALALVVR_x000B_DFCPLRVFCAYYSRVVWNLMIKADQPPANWMKSGVDENAKFAAFDFFHGILSPASLYVPLERHPTSAERI_x000B_ANQAMFAVKIANAPGNGTDLTMDHVAFTKGRTTQSSGLRPTPFNI	ATGAGCTTCGACTACACTCACCCTCTCTACCGCAGCTATCCATTTCCACATTACTGCGAGTTCGACAGGCACCTACTCTGCGACCATCATCCAGTACTCAAACCTCCAACTCACAAACCCAGTGCCCCGAACTCTCTCATGTCTACCGACAACAACAAGGGCAAACAACCACTTCACCCGACACCTTCGGGCCCTAACGACACGACCCCGAAACCTATCCCTGTACCCAATCCCTCAGCTACGCCCACAGCTGCAGGTAAGGAAAACCAAGAGCCCATCGAAAAGCGTATCATACACGCTTTCCACGCTGAAGCAAAAACCCACAACAATGGGGTCTCTCCACCTGCCTTCAACCCGAACAATATGAATGCTGTGCCGCTGAACCTGCTCAACCTCAAC…
CYVCV	CA17	OQ418502	WRN92108		COAT PROTEIN	USA: California	lemon	MSFDYTHPLYRSYPFPHYCEFDRHQLCDHHPALKPPTHRPSAPNSLMSTNDNKGKQPLHPTPSGPNDTTP_x000B_KPIPVPTPSATPTAAGKENQEPIEKRITHAFHAEAKTHNNGVSPPAFNPNNMNAVPLNLLNLNLRYSPVT_x000B_NSIANPKQTEAIGKAWVRILNIDPANVFLYAIDLARACADAGSSPEADIIGANEDLNPVVERNALALVVR_x000B_DFCPLRAFCAYYSRVVWNLMIKADQPPANWMKSGVDENAKFAAFDFFHGILSPASLYVPLERHPTSAERI_x000B_ANQAMFAVKIANAPGNGTDLTMDHVAFTKGRTTQTSGLRPTPFNI_x000B_	ATGAGCTTCGACTACACTCACCCTCTCTACCGCAGCTATCCATTTCCACACTACTGCGAGTTCGACCGGCACCAACTCTGCGACCATCATCCAGCACTCAAACCTCCAACTCACAGACCTAGTGCCCCGAACTCTCTCATGTCTACCAACGACAACAAGGGCAAACAACCACTTCACCCGACACCTTCGGGCCCTAACGACACGACCCCGAAACCTATCCCTGTACCCACTCCCTCAGCTACGCCCACAGCTGCAGGTAAGGAAAACCAAGAGCCCATCGAAAAGCGTATCACACACGCTTTCCACGCTGAAGCAAAAACCCACAACAATGGGGTTTCTCCACCTGCCTTTAACCCGAACAATATGAACGCTGTGCCGCTGAACCTGCTCAACCTCAAC…
CYVCV	CA17	OQ418502	WRN92104		RdRP (Partial)	USA: California	lemon	MATIRGAIERITDTTVRTTLQEEACRQIRAELKNVEHINRYAIQPDAADALEHLGIGSNPFSVALHTHGACKAIENQLLYVVGTLLPKERVTMLFLKKSKLNIMKRCPKFQDIFLNQHIEPRDVSRYCDFNVQSTSTSIPTRTAYISDTLHFMDRRDLVRLFLNSPNLETLYATIVLPVEAAYKQPSRYPEIYQINYDFDGFQYIPGGHGGGAYHHEFEQLQWLDTGHIHWRGPDCKEIRMTITAQMLESLGANHLFCFKRGKLLTPRVRTFGRDTQ_x000B__x000B_	ATGGCCACTATTAGGGGTGCCATCGAACGCATTACAGACACCACCGTACGCACTACACTT CAAGAGGAGGCATGCCGCCAAATACGCGCTGAACTTAAAAACGTCGAACACATCAACCGT TACGCTATACAGCCTGACGCCGCCGACGCACTCGAACACCTAGGCATTGGTTCTAACCCC TTCTCTGTGGCACTGCACACGCACGGTGCCTGCAAAGCGATCGAGAACCAATTACTCTAT GTAGTTGGTACCCTACTCCCAAAAGAACGTGTCACCATGCTCTTCCTTAAGAAAAGCAAA CTCAACATCATGAAACGCTGCCCTAAATTCCAAGACATCTTCCTGAACCAACATATCGAA CCACGGGACGTTTCTAGGTACTGCGACTTTAAC…
CYVCV	IS	KT345342	ANQ46537		COAT PROTEIN	Pakistan	lemon Cascade Eureka	MSFDYTHPLYRSYPFPHYCEFDRHQLCDHHPVLKPPTHKPSAPNSLMSTNDSKGKQPLHPTPPVPNDTTP_x000B_KPIPVPTPSATPTAAGKENQEPIEKRIIHAFHAEAKTHNNGVSPPVFNPNNMNAVPLNLLNLNLRYSPVT_x000B_NSIANPKQTEAIGKAWIRILNIDPANVFLYAIDLARACADAGSSPEADIIGANEDLNPVVERNALALVVR_x000B_DFCPLRAFCAYYSRVVWNLMIKADQPPANWMKSGVDENAKFAAFDFFHGILSPASLYVPLERHPTSAERI_x000B_ANQAMFAVKIANAPGNGTDLTMDHVAFTKGRTTQSSGPRPTPFNI	ATGAGCTTCGACTACACTCACCCTCTCTACCGCAGCTATCCATTTCCACATTACTGCGAG TTCGACCGGCACCAACTCTGCGACCATCATCCAGTACTCAAACCTCCAACTCACAAACCC AGTGCCCCGAACTCTCTCATGTCTACCAACGACAGCAAGGGCAAACAACCACTTCACCCG ACACCTCCGGTCCCTAACGACACGACCCCGAAACCTATCCCTGTACCCACTCCCTCAGCT ACGCCCACAGCTGCAGGTAAGGAAAACCAAGAGCCCATCGAAAAGCGTATCATACACGCT TTCCACGCTGAAGCAAAAACCCACAACAATGGGGTCTCCCCACCTGTCTTTAACCCGAAC AATATGAATGCTGTGCCGCTGAACCTGCTCAAC…
CYVCV	DLI	KT696522	AOX15540		COAT PROTEIN	India	lemon	MSFDYTHPLYRSYPFPHYCEFDRHQLCDHHPVLKPPTHKPSAPNSLMSTDDNKGKQPLHPTPSGPNDTAP_x000B_KPIPVPTPSATPTAAGKENREPIEKRVILAFHAEAKTHNNGVSPPAFNPNNMNAVPLNLLNLNLRYSPVT_x000B_NSIANPKQTEAIGKAWVRILNIDPANVFLYAIDLARACADAGSSPEADIIGANEDLNPVVERNALALVVR_x000B_DFCPLRAFCAYYSRVVWNLMIKADQPPANWMKSGVDENAKFAAFDFFHGILSPASLYVPLERHPTSAERI_x000B_ANHAMFAVKIANAPGNGTDLTMDHVAFTKGRTTQSSGLRPTPFNI	ATGAGCTTCGACTACACTCACCCTCTCTACCGCAGCTATCCATTTCCACATTACTGCGAGTTCGACCGGC_x000B_ACCAACTCTGCGACCATCATCCAGTACTCAAACCTCCAACTCACAAACCCAGTGCCCCGAACTCTCTCAT_x000B_GTCTACCGACGACAACAAGGGCAAACAACCACTTCACCCGACACCTTCGGGTCCTAACGACACGGCCCCG_x000B_AAACCTATCCCTGTGCCCACCCCCTCAGCTACGCCCACAGCTGCGGGTAAGGAAAACCGAGAGCCCATCG_x000B_AAAAGCGTGTCATACTCGCTTTCCACGCTGAAGCAAAAACCCACAACAATGGGGTCTCTCCACCCGCCTT_x000B_TAACCCGAACAATA…
CYVCV	AKI	KT696517	AOX15535		COAT PROTEIN	India: Abohar	kinnow	MSFDYTHPLYRSYPFPHYCEFDRHQLCDHHPVLKPPAHKPSAPSSLMSTNDNKGKQPLHPTPSGPNDTTP_x000B_KPIPVLTPSATPTAAGKENQEPIEKRIIHAFHAEAKTHNNGVSPPAFNPNNMNAVPLNLLNLNLRYSPVT_x000B_NSIANPKQTEAIGKAWVRILNIDPANVFLYAIDLARACADAGSSPEADIIGANEDLNPVVERNALALVVR_x000B_DFCPLRALCAYYSRVVWNLMIKADQPPANWMKSGVDENAKFAAFDFFHGILSPASLYVPLERHPTSAERI_x000B_ANQAMFAVKIANAPGNGADLTMDHVAFTKGRTTQSSGLRPTPFNI_x000B_	ATGAGCTTCGACTACACTCACCCTCTCTACCGCAGCTACCCATTTCCACACTACTGCGAGTTCGACCGGC_x000B_ACCAACTCTGCGACCATCATCCAGTACTCAAACCTCCAGCTCACAAACCCAGTGCTCCGAGCTCTCTCAT_x000B_GTCTACTAACGACAACAAGGGCAAACAACCACTTCACCCGACACCTTCGGGCCCTAACGACACGACTCCG_x000B_AAACCTATCCCTGTACTCACTCCCTCAGCTACGCCCACAGCTGCAGGTAAGGAAAACCAAGAGCCCATCG_x000B_AAAAGCGTATCATACACGCTTTCCACGCCGAAGCAAAAACCCACAACAATGGGGTCTCTCCACCTGCCTT_x000B_TAACCCGAACAATA…
CiYMV	PS	NC_076409	NP_203553		RdRP (Partial)	India	Citrus reticulata cv. kinnow mandarin	MATIRGAIDRITDTTVRTTLQEEACRQIRTELKHVEHINKFAIQPDAADALEHLGIGSNPFSIKLHTHGACKAIENQLLYVVGTLLPKERVTMLFLKKSKLNIMKRCPKFQDIFLNQHIEPRDVSRYCDFNVQSTATSIPTQTAYISDTLHFMTRKDLMRLFINSPTLETLYATIVLPVEAAYKQPSRYPEIYHINYDFEGFQYIPGGHGGGAYHHEFEQLEWLDVGHIHFKDPEKYETQLTITAQLIESLGANHLFCFKRGKLSTPRVRTFGRDTQ_x000B__x000B_	ATGGCTACTATTAGGGGTGCTATTGACCGCATTACTGACACAACTGTGCGTACCACATTG_x000B_CAAGAGGAAGCATGCAGGCAAATTCGAACAGAGCTCAAGCATGTCGAGCATATCAATAAG_x000B_TTTGCCATACAACCAGATGCCGCAGATGCACTTGAACATCTTGGCATCGGATCGAATCCT_x000B_TTCTCTATCAAACTACACACACATGGGGCCTGCAAGGCTATAGAGAACCAATTACTGTAT_x000B_GTAGTTGGCACCCTTCTGCCCAAGGAACGTGTCACCATGCTCTTCCTAAAGAAGAGCAAA_x000B_CTCAACATTATGAAACGATGTCCGAAATTCCAGGATATATTCCTAAACCAACACATCGAA_x00…
CiYMV	PS	NC_076409	YP_010798312		COAT PROTEIN	India	Citrus reticulata cv. kinnow mandarin	MSLDYQHPNFRNYPYPHYCEYDKHQYCDHHPELRKPKHPQPSDPPALMSNTQAKGKEPLETTPVAPSAQG_x000B_NPTAVPVPPPDSKGKSAPIPEPIEKRISQAFHAEPKTHNNGGPPAEFNPNNMNAVPLNLLNLNLRYSPVT_x000B_NSIANPKQTEAIGKAWCRILHIDPSNVFLYAVDLARACADAGTSPEADIIGANEDFDPVVERSALAGVVR_x000B_DFCPLRAFCAYYSRVVWNLMIKADQPPANWMKSGVDESAKFAAFDFFHGVLSPASLYVPLERHPTAAERI_x000B_ANQAMFAVKIANAPGNGSELAMDHVAFTKGRITQTSNQSKTPFAT	ATGAGCTTAGACTATCAGCATCCCAACTTTAGGAATTACCCCTACCCCCATTACTGTGAG_x000B_TACGATAAACATCAGTATTGCGACCACCATCCCGAGCTGCGCAAGCCAAAGCATCCTCAG_x000B_CCCTCTGACCCCCCAGCTCTAATGTCCAACACCCAGGCAAAAGGTAAGGAACCTCTTGAG_x000B_ACCACTCCTGTGGCTCCAAGTGCCCAAGGCAACCCCACAGCCGTACCTGTACCTCCCCCT_x000B_GACTCTAAAGGGAAATCGGCACCCATCCCAGAGCCCATTGAGAAAAGAATTTCACAAGCT_x000B_TTCCACGCTGAGCCCAAGACTCACAACAATGGAGGGCCTCCTGCCGAGTTCAACCCAAAC_x00…
CiYMV	KD-2022	OR251442	WVH45229	Kin-Del	RdRP (Partial)	India: IARI, New Delhi	Citrus reticulata (Kinnow mandarin)	MATIRGAIDRITDTTVRTTLQEEACRQIRTELKHVEHINKFAIQPDAADALEHLGIGSNPFSIKLHTHGACKAIENQLLYVVGTLLPKERVTMLFLKKSKLNIMKRCPKFQDIFLNQHIEPRDVSRYCDFNVQSTATSIPTQTAYISDTLHFMTRKDLMRLFINSPTLETLYATIVLPVEAAYKQPSRYPEIYHINYDFEGFQYIPGGHGGGSYHHEFEQLEWLDVGHIHFKDPEKYETQLTITAQLIESLGANHLFCFKRGKLSTPRVRTFGRDTQ_x000B__x000B_	ATGGCTACTATTAGGGGTGCTATTGACCGCATTACTGACACAACTGTGCGTACCACATTG_x000B_CAAGAGGAAGCATGCAGGCAAATTCGAACAGAGCTTAAGCATGTCGAGCATATCAATAAG_x000B_TTTGCCATACAACCAGATGCCGCAGATGCACTTGAACATCTTGGCATTGGATCGAATCCT_x000B_TTCTCTATCAAACTACACACACATGGGGCCTGCAAAGCTATAGAGAACCAATTACTCTAT_x000B_GTAGTTGGCACCCTTCTGCCCAAGGAACGTGTCACCATGCTCTTCTTAAAGAAGAGCAAA_x000B_CTCAACATTATGAAACGATGTCCGAAATTCCAAGATATATTCCTAAACCAACACATCGAA_x00…
CiYMV	KD-2022	OR251442	WVH45227	Kin-Del	COAT PROTEIN	India: IARI, New Delhi	Citrus reticulata (Kinnow mandarin)	MSLDYQHPNFRNYPYPHYCEYDRHQYCDHHPELRKPKHPQPSDPTALMSNPQAKGKEPLETAPVAPSAQD_x000B_NTTAAPVPPHDSKGKSAPIPEPIEKRISQAFHAEPKTHNNGGPPAEFNPNNMNAVPLNLLNLNLRYSPVT_x000B_NSIANPKQTEAIGKAWCRILHINPSNVFLYAVDLARACADAGTSPEADIIGANEDFDPVVERSALAGVVR_x000B_DFCPLRAFCAYYSRVVWNLMIKADQPPANWMKSGVDESAKFAAFDFFHGVLSPASLYVPLERHPTTAERI_x000B_ANQAMFAVKIANAPGSGSELAMDHVAFTKGRITQTSNQNKTPFAT	ATGAGCTTAGACTATCAGCATCCCAACTTTAGGAATTACCCCTACCCCCATTACTGTGAG_x000B_TACGATAAACATCAGTATTGCGACCACCATCCCGAGCTGCGCAAGCCAAAGCATCCTCAG_x000B_CCCTCTGACCCCCCAGCTCTAATGTCCAACACCCAGGCAAAAGGTAAGGAACCTCTTGAG_x000B_ACCACTCCTGTGGCTCCAAGTGCCCAAGGCAACCCCACAGCCGTACCTGTACCTCCCCCT_x000B_GACTCTAAAGGGAAATCGGCACCCATCCCAGAGCCCATTGAGAAAAGAATTTCACAAGCT_x000B_TTCCACGCTGAGCCCAAGACTCACAACAATGGAGGGCCTCCTGCCGAGTTCAACCCAAAC_x00…
CiYMV	SRIG	JX310796	AFO83513	Sriganganagar Kinnow	COAT PROTEIN	India	Citrus reticulata Blanco (Kinnow)	EPIEKRISQAFHAEPKTHNNGRASSEFNPNNMNAVPLSLLNLNLRYSPVTNSIANPKQTEAIGKAWCRIL_x000B_HIDPSKVFLYAVDLARACADAGTSPEADIIGANEDFDPVVERSALAGVVRDFCPLRAFCAYYSRVVWNLM_x000B_IKADQPPANWMKSGVDESAKFAAFDFFHGVLSPASLYVPLERHPTAAERIANQAMFAVKTANAPGNGSDL_x000B_AMDHVAFTKGRITQTSNQNKTPFAT	GAGCCCATTGAGAAAAGAATTTCACAAGCTTTCCACGCTGAGCCCAAGACCCACAACAATGGGAGGGCCT_x000B_CCTCCGAGTTTAACCCAAACAACATGAATGCAGTGCCCCTTAGCCTGCTCAACCTTAACCTCAGATACTC_x000B_TCCCGTAACTAACTCCATCGCCAACCCTAAACAGACTGAAGCTATTGGCAAAGCCTGGTGCCGCATCCTT_x000B_CACATCGACCCTAGCAAAGTATTCTTATACGCTGTGGACCTTGCCCGTGCCTGCGCTGACGCCGGAACCT_x000B_CACCTGAAGCAGACATCATTGGCGCCAACGAAGATTTCGATCCTGTGGTTGAGCGTAGTGCCCTCGCCGG_x000B_CGTCGTCAGAGACT…
ICRV	PUCP	HQ324250	AEK87114		COAT PROTEIN_x000B_ICRSV-A	India, Pune	sweet orange	MSFDYTDPTFRNYPFPHYCDFDRHQHCDHDLHTNPPPTELPSRKSKFMATSENKGKQPLHPPPTEDFPKP_x000B_PPPPSSTQATPTPPDQTKALEPIEKRIIHAFHAEPKTHTNGEAPPAFNPNNMNAVPLNLLNINLKYSPVT_x000B_NSIANPKQTEAIGKAWVRILQIDPANVFLYAIDLARACADAGSSPEADIIGANEDLNPVVERNALAGVVR_x000B_DFCPLRAFCAYYSRVVWNLMIKADQPPANWMKSGIDEGAKFAAFDFFHGVLSPASLYVPLERHPTAAERI_x000B_ANQAMFAVKIANAPGNGSELTMDHVAFTKGRITADSKPRPTPFNT	ATGAGCTTTGACTACACAGATCCAACCTTCCGTAATTACCCCTTCCCGCACTACTGTGAT_x000B_TTCGACCGCCACCAACACTGCGACCACGACCTACACACCAATCCACCTCCAACCGAGCTA_x000B_CCATCCCGAAAATCCAAATTCATGGCTACCAGTGAGAACAAAGGCAAACAGCCGCTTCAC_x000B_CCGCCTCCCACCGAAGACTTTCCAAAACCTCCACCACCACCGTCGAGCACCCAGGCTACT_x000B_CCCACACCGCCCGACCAGACGAAGGCTCTTGAACCCATTGAGAAAAGAATCATCCACGCC_x000B_TTCCACGCTGAACCCAAAACCCACACCAATGGAGAAGCCCCCCCAGCATTCAATCCCAAT_x00…
ICRV	PUCP	HQ324250	AEK87114		RDRP (Partial)_x000B_ICRSV-A	India, Pune	sweet orange	MATIRGAIDRITDTTVRTTLQEEACRQIRTELKNVEHVNRYAIPPDAADALEHLGIGTNPFSVKLHTHGACKAIENQLLYVVGTLLPKERVTMLFLKKSKLNFMKRCPKFQDIFLNQHIEPRDVSRYCDFNVQSTSTSIPTHTAYISDTLHFMDRKDLVRLFINSPNLDTLYATIVLPVEAAYRQPSRYPDLYQINYDFDGFQYIPGGHGGGAYHHEFNHLEWLDVGHIHWRGPDNKDVQLTITAQMIESLGANHLFCFRRGNLRTPRVRTFGRDTQ_x000B__x000B_	ATGGCCACTATTAGGGGTGCCATCGATCGTATCACAGACACCACCGTACGCACGACACTA_x000B_CAGGAGGAGGCTTGCAGACAAATCCGTACCGAACTTAAGAACGTAGAACATGTTAATAGG_x000B_TACGCCATCCCGCCAGATGCCGCAGACGCCCTAGAACATCTTGGCATTGGCACCAACCCC_x000B_TTCTCGGTCAAATTGCATACACACGGTGCCTGTAAAGCGATCGAAAACCAGCTACTCTAC_x000B_GTAGTTGGTACTTTGCTACCAAAAGAAAGAGTTACCATGCTCTTTCTTAAGAAATCTAAG_x000B_CTCAACTTCATGAAGAGATGCCCGAAGTTCCAAGACATCTTCCTAAATCAGCACATAGAA_x00…
ICRV	K1	NC_003093	NP_203557		COAT PROTEIN_x000B_ICRSV-A	India	Kinnow mandarin	MSFDYTDPTFRNYPFPHYCDFDRHQHCDHDLRTNPPPTEPPSRKSKLMSTSENKGKQPLHPPPTEGFPKP_x000B_PPPPSSTPTTPTPPDQTKAPEPIEKRIIHAFHAEPKTHTNGEAPPAFNPNNMNAVPLNLLNINLKYSPVT_x000B_NSIANPKQTEAIGKAWVRILQIDPANVFLYAIDLARACADAGSSPEADIIGANEDLNPVVERNALAGVVR_x000B_DFCPLRAFCAYYSRVVWNLMIKADQPPANWMKSGIDEGAKFAAFDFFHGVLSPASLYVPLERHPTAAERI_x000B_ANQAMFAVKIANAPGNGSELTMDHVAFTKGRITADSKPRPTPFNT	ATGAGCTTTGACTACACAGACCCAACCTTCCGTAATTACCCCTTCCCGCACTACTGTGAT_x000B_TTCGACCGCCACCAACACTGCGATCACGACCTACGAACCAATCCACCTCCAACCGAGCCA_x000B_CCATCCCGAAAATCCAAACTCATGTCTACCAGTGAGAACAAAGGCAAACAGCCGCTTCAC_x000B_CCGCCTCCCACCGAAGGCTTTCCAAAACCTCCACCACCACCGTCGAGCACTCCGACTACT_x000B_CCTACACCGCCCGACCAGACGAAGGCTCCTGAACCCATTGAGAAAAGAATCATCCACGCC_x000B_TTCCACGCTGAACCTAAAACCCACACCAATGGAGAAGCCCCCCCGGCATTCAATCCCAAT_x00…
ICRV	AbhCP01	OP589301	NP_203557	Cit-Abh-CP-01	COAT PROTEIN_x000B_ICRSV-A	India	Kinnow	MSFDYTDPTFRNYPFPHYCDFDRHQHCDHDLRTNPPPTEPPSRKSKLMSTSENKDKQPLHPPPTEGFPKP_x000B_PPPPSSTPTTPTPPDQTKAPEPIEKRIIHAFHAEPKTHTNGEAPPAFNPNNMNAVPLNLLNINLKYSPVT_x000B_NSIANPKQTEAIGKAWVRILQIDPANVFLYAIDLARACADAGSSPEADIIGANEDLNPVVERNALAGVVR_x000B_DFCPLRAFCAYYSRVVWNLMIKADQPPANWMKSGIDEGAKFAAFDFFHGVLSPASLYVPLERHPTAAERI_x000B_ANQAMFAVKIANAPGNGSELTMDHVAFTKGRITADSKPRPTPFNT	ATGAGCTTTGACTACACAGACCCAACCTTCCGTAATTACCCCTTCCCGCACTACTGTGATTTCGACCGCC_x000B_ACCAACATTGCGATCACGACCTACGAACCAATCCACCTCCAACCGAGCCACCATCCCGAAAATCCAAACT_x000B_CATGTCTACCAGTGAGAACAAGGACAAACAGCCGCTTCACCCGCCTCCCACCGAAGGCTTTCCAAAACCT_x000B_CCACCACCACCGTCGAGCACTCCGACTACTCCTACACCGCCCGACCAGACGAAGGCTCCTGAACCCATTG_x000B_AGAAAAGAATCATCCACGCCTTCCACGCTGAGCCTAAAACCCACACCAATGGAGAAGCCCCCCCGGCATT_x000B_CAATCCCAATAACA…
CYVCV	ECAI	KT696510	AOO32380	ECAI	COAT PROTEIN	India; Abohar	etrog citron	MSFDYTHPLYRNYPFPHYCEFDRHQLCDHHPVLKPPTHKPSAPNSLMSTDDNKGKQPLHPAPPGPNDTTP_x000B_KPIPALTPSATPTAAGKENQEPIEKRIIHAFHAEAKTHNNGASPPAFNPNNMNAVPLNLLNLNLRYSPVT_x000B_NSIANPKQTEAIGKAWVRILNIDPANVFLYAIDLARACADAGSSPEADIIGANEDLNPVVERNALALVVR_x000B_DFCPLRAFCAYYSRVVWNLMIKADQPPANWMKSGVDENAKFAAFDFFHGILSPASLYVPLERHPTSAERI_x000B_ANQAMFAVKIANAPGNGTDLTMDHVAFTKGRTTQSSGLRPTPFNI_x000B_	ATGAGCTTCGACTACACTCACCCTCTCTACCGAAACTATCCATTTCCGCACTACTGCGAG_x000B_TTCGACCGGCACCAACTCTGCGACCATCATCCAGTACTCAAACCTCCAACTCACAAACCC_x000B_AGCGCCCCGAACTCCCTCATGTCCACCGACGACAACAAGGGCAAACAACCACTTCACCCG_x000B_GCACCTCCGGGCCCTAACGACACGACCCCGAAACCTATCCCTGCACTCACTCCCTCAGCA_x000B_ACGCCCACAGCTGCAGGTAAGGAAAACCAAGAGCCCATCGAAAAGCGTATCATACACGCT_x000B_TTCCACGCTGAAGCAAAAACCCACAACAATGGGGCCTCTCCACCTGCCTTTAACCCGAAC_x00…
Mandarivirus sp.	H1	AOX15541	KT696523		COAT PROTEIN	India	orange	MSFDYTHLLYRNYPFPHYCEFDRHQLCDHHPVTKPPSRRPDTPNYLMATNNNHGKQPPSPIAPSNPPVPT_x000B_PPTPVDKPENSNRTSNPPPVDKENREPVEKRVIHAFHAEPKTHNNGTPPPAFNPNNMNAVPLNLLNLNLK_x000B_YSPVTNSIANPKQTEAVGKAWVRILNIDPANVFLYAIDLARACADAGSSPEADIIGANEDLNPIVERNAL_x000B_ASVVRDFCPLRAFCAYYSRVVWNLMIKADQPPANWMKSGVDENAKFAAFDFFHGILSPASLYVPLERHPT_x000B_SAERIANQAMFAVKIANAPGNGTDLTMDHVAFTRGKTTQTSGARPTPFNI	ATGAGCTTCGACTACACTCACCTGCTCTACCGGAACTACCCTTTCCCACATTACTGCGAATTCGATCGCC_x000B_ACCAGCTGTGTGACCACCATCCCGTAACTAAACCGCCGTCACGCAGGCCCGACACGCCTAACTACCTCAT_x000B_GGCCACTAACAACAACCACGGCAAGCAGCCGCCCAGCCCTATTGCCCCATCTAACCCGCCGGTACCCACT_x000B_CCACCAACGCCTGTCGACAAACCGGAGAACTCCAACCGCACCAGCAATCCCCCGCCTGTTGACAAGGAGA_x000B_ACCGGGAACCTGTTGAGAAGAGGGTCATCCACGCTTTCCATGCTGAGCCCAAGACCCACAACAATGGCAC_x000B_ACCTCCACCTGCCT…
Mandarivirus sp.	DLI2	AOX15542	KT696524		COAT PROTEIN	India	lemon	MSFNYTHPLYRNYPFPHYCEFDRHQLCDHHPIDKPPKHQPVTLNRPMTTDDNRGKQPLNPITPPNPVVPS_x000B_PSAPPQKPEAPNRANAPLPDNKENHEPTEKRIIHAFHAEPKTHNNGAPPPAFNPSNMNAVPLNLLNLNLK_x000B_YSPVTNSIANPKQTEAIGKAWVRILNIDPANVFLYAIDLARACADAGSSPEADIIGANEDLTPIVERNAL_x000B_ASVVRDFCPLRAFCAYYSRVVWNLMIKADQPPANWMKSGVDENAKFAAFDFFHGILSPASLYVPLERHPT_x000B_SAERIANQAMFAVKIASAPGNGTDLTMDHVAFTRGKTTQTSGARPTPFNI	ATGAGCTTCAACTACACTCACCCGCTCTACAGAAACTACCCCTTCCCACATTACTGTGAATTCGACCGCC_x000B_ACCAGCTTTGCGACCACCACCCGATCGATAAGCCGCCCAAGCACCAACCGGTTACACTAAACCGTCCTAT_x000B_GACCACTGACGATAACCGTGGCAAACAGCCACTGAACCCAATAACACCACCGAATCCGGTGGTCCCGAGT_x000B_CCCTCCGCACCGCCCCAGAAGCCAGAAGCTCCCAACCGCGCAAATGCCCCACTGCCTGACAATAAAGAAA_x000B_ATCATGAACCGACTGAGAAGAGGATCATCCATGCCTTCCACGCCGAGCCCAAGACCCACAACAATGGGGC_x000B_ACCACCGCCCGCTT…
CYVCV	Y1	JX040635	AFO65015		COAT PROTEIN	Turkey	lemon	MSFDYTHPLYRSYPFPHYCEFDRHQLCDHHPVLKPPTHKPSAPNSLMSTNDNKGKQPLHPTPPGPNDTTP_x000B_KPIPVPTPSATPTAAGKENQEPIEKRIIHAFHAEAKTHNNGASPPAFNPNNMNAVPLNLLNLNLRYSPVT_x000B_NSIANPKQTEAIGKAWVRILNIDPANVFLYAIDLARACADAGSSPEADIIGANEDLNPVVERNALALVVR_x000B_DFCPLRAFCAYYSRVVWNLMIKADQPPANWMKSGVDENAKFAAFDFFHGILSPASLYVPLERHPTSAERI_x000B_ANQAMFAVKIANAPGNGTDLTMDHVAFTKGKTTQSSGLRPTPFNI	ATGAGCTTCGACTACACTCACCCTCTTTACCGCAGCTATCCATTTCCACATTACTGCGAG_x000B_TTCGACCGGCACCAACTCTGCGACCATCATCCAGTACTCAAACCTCCAACTCACAAACCC_x000B_AGTGCCCCGAACTCTCTCATGTCTACCAACGACAACAAGGGCAAACAACCACTTCACCCG_x000B_ACACCTCCGGGCCCTAACGACACGACCCCGAAACCTATCCCCGTGCCCACTCCCTCAGCT_x000B_ACACCCACAGCTGCAGGTAAGGAAAACCAAGAGCCCATCGAAAAGCGTATCATACACGCT_x000B_TTCCACGCTGAAGCAAAAACCCACAACAATGGGGCCTCTCCACCTGCCTTTAACCCGAAC_x00…
CYVCV	LEN	KX902488	ARD24444		COAT PROTEIN	Iran	lemon	YRSYPFPHYCEFDRHQLCDHHPVLKPPTHKPSAPNSLMSTNGDKGKQPLHPTPPGPNDTTPKPIPVPTPS_x000B_ATPTAAGKENQEPIEKRIIHAFHAEAKTHNNGVSPPAFNPNNMNAVPLNLLNLNLRYSPVTNSIANPKQT_x000B_EAIGKAWVRILNIDPANVFLYAIDLARACADAGSSPEADIIGANEDLNPVVERNALALVVRDFC	TTTACCGCAGCTATCCATTTCCACATTACTGCGAGTTCGACCGGCACCAACTCTGCGACCATCATCCAGT_x000B_ACTCAAACCTCCAACTCACAAACCCAGTGCCCCGAATTCTCTCATGTCTACCAACGGCGACAAGGGCAAA_x000B_CAACCACTTCACCCGACACCTCCGGGCCCTAACGACACGACCCCGAAACCTATCCCTGTACCTACTCCCT_x000B_CAGCTACGCCTACAGCTGCAGGTAAGGAAAACCAAGAGCCCATCGAAAAGCGTATCATACACGCTTTCCA_x000B_CGCTGAAGCAAAAACCCACAACAATGGGGTCTCTCCACCTGCCTTTAACCCGAACAACATGAATGCTGTG_x000B_CCGCTGAACCTGCT…
CYVCV	LIE	KX902487	ARD24443		COAT PROTEIN	Iran	Persian lime	YRSYPFPHYCEFDRHQLCDHHPVLKPPTHKPSAPNSLMSTNDNKGKQPLHPTPPGPNDTTPKPIPVPTPS_x000B_ATPTAAGKENQEPIEKRITHAFHAEAKTHNNGVSPPAFNPNNMNAVPLNLLNLNLRYSPVTNSIANPKQT_x000B_EAIGKAWVRILNIDPANVFLYAIDLARACADAGSSPEADIIGANEDLNPVVERNALALVVRDFC_x000B_	TTTACCGCAGCTATCCATTTCCACACTACTGCGAGTTCGACCGGCACCAACTCTGCGACCATCATCCAGT_x000B_ACTCAAACCTCCAACTCACAAACCCAGTGCCCCGAACTCTCTCATGTCTACCAACGACAACAAGGGCAAA_x000B_CAACCACTTCACCCGACACCTCCGGGCCCTAACGACACGACCCCGAAACCTATCCCTGTACCCACTCCCT_x000B_CTGCCACACCCACAGCTGCAGGTAAGGAAAACCAAGAGCCCATCGAAAAGCGTATCACACACGCTTTCCA_x000B_CGCTGAAGCAAAAACCCACAACAATGGGGTCTCTCCACCTGCCTTTAACCCGAACAATATGAACGCTGTG_x000B_CCGCTGAACCTGCT…
CYVCV	SOU	KX902486	ARD24442		COAT PROTEIN	Iran	sour orange	YRSYPFPHYCEFDRHQLCDHHPVLKPPTHKPSAPNSLMSTDDNKGKQPLHPTPPGPNDTTPKPIPAPTPS_x000B_ATPTAAGKENQEPIEKRIIHAFHAEAKTHNNGVSPPAFNPNNMNAVPLNLLNLNLRYSPVTNSIANPKQT_x000B_EAIGKAWVRILNIDPANVFLYAIDLARACADAGSSPEADIIGANEDLNPVVERNALALVVRDFC_x000B_	TTTACCGCAGCTATCCATTTCCACACTACTGCGAGTTCGACCGGCACCAACTCTGCGACCATCATCCAGT_x000B_ACTCAAACCTCCAACTCACAAACCCAGCGCCCCGAACTCTCTCATGTCTACCGACGACAACAAGGGCAAA_x000B_CAACCACTTCACCCGACACCTCCGGGCCCTAACGACACGACCCCGAAACCTATCCCTGCACCCACTCCCT_x000B_CAGCTACGCCCACAGCTGCAGGTAAGGAAAACCAAGAGCCCATCGAAAAGCGTATCATACACGCTTTCCA_x000B_CGCTGAAGCAAAAACCCACAACAATGGGGTCTCTCCACCTGCCTTTAACCCGAACAATATGAATGCTGTG_x000B_CCACTGAACCTGCT…
CYVCV	MgAg2	MW600325	ULE28349		COAT PROTEIN	Iran	lemon	HPVLKPPTHKPSAPNSLMSTDDNKGKQPLHPTPPGPNDTTPKPIPVPTPSATPTAAGKENQEPIEKRIIH_x000B_AFHAEAKTHNNGVSPPAFNPNNMNAVPLNLLNLNLRYSPVTNSIANPKQTEAIGKAWVRILNIDPANVFL_x000B_YAIDLARACADAGSSPEADIIGANED_x000B_	CATCCAGTACTCAAACCCCCAACTCACAAACCCAGTGCCCCGAACTCTCTCATGTCTACCGACGACAACA_x000B_AGGGCAAACAACCACTTCACCCGACACCTCCGGGCCCTAACGACACGACCCCGAAACCTATCCCTGTACC_x000B_CACTCCCTCTGCCACACCCACAGCTGCAGGTAAGGAAAACCAAGAGCCCATCGAAAAGCGTATCATACAC_x000B_GCTTTCCACGCTGAAGCAAAAACCCACAACAATGGGGTCTCTCCACCTGCCTTTAACCCGAACAATATGA_x000B_ACGCTGTGCCGCTGAACCTGCTCAACCTCAACCTAAGATACTCACCGGTCACTAACTCCATAGCTAACCC_x000B_TAAACAGACCGAGG…
CYVCV	MgAg1	MW600324	ULE28348		COAT PROTEIN	Iran	lemon	HPVLKPPTHKPSAPNSLMSTDDNKGKQPLHPTPPGPNDTTPKPIPVPTPSATPTAAGKENQEPIEKRITH_x000B_AFHAEAKTHNNGVSPPAFNPNNMNAVPLNLLNLNLRYSPVTNSIANPKQTEAIGKAWVRILNIDPANVFL_x000B_YAIDLARACADAGSSPEADIIGANED_x000B_	CATCCAGTACTCAAACCCCCAACTCACAAACCCAGTGCCCCGAACTCTCTCATGTCTACCGACGACAACA_x000B_AGGGCAAACAACCACTTCACCCGACACCTCCGGGCCCTAACGACACGACCCCGAAACCTATCCCTGTACC_x000B_CACTCCCTCTGCTACACCCACAGCTGCAGGTAAGGAAAACCAAGAGCCCATCGAAAAGCGTATCACACAC_x000B_GCTTTCCACGCTGAAGCAAAAACCCACAACAATGGGGTCTCTCCACCTGCCTTTAACCCGAACAATATGA_x000B_ACGCTGTGCCGCTGAACCTGCTCAACCTCAACCTAAGATACTCACCGGTCACTAACTCCATAGCTAACCC_x000B_TAAACAGACCGAGG…
CYVCV	MgTa3	MW600323	ULE28348		COAT PROTEIN	Iran	lemon	VLKPPTHKPSAPNSLMSTDDNKGKQPLHPTPPGPNDTTPKPIPVPTPSATPTAAGKENQEPIEKRIIHAFHAEAKTHNNGVSPPAFNPNNMNAVPLNLLNLNLRYSPVTNSIANPKQTEAIGKAWVRILNIDPANVFLYAIDLARACADAGSSPEADIIGANEDLNPVVERNALALVVRDF_x000B_	CAGTACTCAAACCCCCAACTCACAAACCCAGTGCCCCGAACTCTCTCATGTCTACCGACGACAACAAGGG_x000B_CAAACAACCACTTCACCCGACACCTCCGGGCCCTAACGACACGACCCCGAAACCTATCCCTGTACCCACT_x000B_CCCTCTGCCACACCCACAGCTGCAGGTAAGGAAAACCAAGAGCCCATCGAAAAGCGTATCATACACGCTT_x000B_TCCACGCTGAAGCAAAAACCCACAACAATGGGGTCTCTCCACCTGCCTTTAACCCGAACAATATGAACGC_x000B_TGTGCCGCTGAACCTGCTCAACCTCAACCTAAGATACTCACCGGTCACTAACTCCATAGCTAACCCTAAA_x000B_CAGACCGAGGCTAT…
CYVCV	MgTa2	MW600322	ULE28346		COAT PROTEIN	Iran	lemon	QLCDHHPVLKPPTHKPSAPNSHMSTDDNKGKQPLHPTPSGPNDTTPKPIPAPTPSATPTATGKENQEPIE_x000B_KRIIHAFHAEAKTHNNGVSPPAFNPNNMNAVPLNLLNLNLRYSPVTNSIANPKQTEAIGKAWVRILNIDP_x000B_ANVFLYAIDLARACADAGSSPEADIIGANEDLNPVVERNALALVV	CCAACTCTGCGACCATCACCCAGTACTCAAACCTCCAACTCACAAACCCAGCGCCCCGAACTCTCACATG_x000B_TCTACCGACGACAACAAGGGCAAACAACCACTTCACCCGACACCTTCGGGCCCTAACGACACGACCCCGA_x000B_AACCTATCCCTGCACCCACTCCCTCAGCTACGCCCACAGCTACAGGCAAGGAAAACCAAGAGCCCATCGA_x000B_AAAGCGTATCATACACGCTTTCCACGCTGAGGCAAAAACCCACAACAATGGGGTCTCTCCGCCTGCCTTT_x000B_AACCCGAACAATATGAATGCTGTGCCGCTGAACCTGCTCAACCTCAACCTAAGATACTCACCGGTCACTA_x000B_ACTCCATAGCTAAC…
CYVCV	MgTa1	MW600321	ULE28345		COAT PROTEIN	Iran	lemon	YRSYPFPHYCEFDRHQLCDHHPVLKPPTHKPSAPNSLMSTDDNKGKQPLHPTPPGPNDTTPKPIPVPTPS_x000B_ATPTAAGKENQEPIEKRITHAFHAEAKTHNNGVSPPAFNPNNMNAVPLNLLNLNLRYSPVTNSIANPKQT_x000B_EAIGKAWVRILNIDPANVFLYAIDLARACADAGSSPEADIIGANEDLNPVVERNALALVVRDFC_x000B_	TTTACCGCAGCTATCCATTTCCACACTACTGCGAGTTCGACCGGCACCAACTCTGCGACCATCATCCAGT_x000B_ACTCAAACCCCCAACTCACAAACCCAGTGCCCCGAACTCTCTCATGTCTACCGACGACAACAAGGGCAAA_x000B_CAACCACTTCACCCGACACCTCCGGGCCCTAACGACACGACCCCGAAACCTATCCCTGTACCCACTCCCT_x000B_CTGCCACACCCACAGCTGCAGGTAAGGAAAACCAAGAGCCCATCGAAAAGCGTATCACACACGCTTTCCA_x000B_CGCTGAAGCAAAAACCCACAACAATGGGGTCTCTCCACCTGCCTTTAACCCGAACAATATGAACGCTGTG_x000B_CCGCTGAACCTGCT…
CYVCV	CL59	MN547331	QKX95018		COAT PROTEIN	Iran	clementine mandarin	YRSYPFPHYCEFDRHQLCDHHPVLKPPTHKPSAPNSHMSTDDNKGKQPLHPTPSGPNDTTPKPIPAPTPS_x000B_ATPTATGKENQEPIEKRIIHAFHAEAKTHNNGVSPPAFNPNNMNAVPLNLLNLNLRYSPVTNSIANPKQT_x000B_EAIGKAWVRILNIDPANVFLYAIDLARACADAGSSPEADIIGANEDLNPVVERNALALVVRDFC_x000B_	TTTACCGCAGCTATCCATTTCCACATTACTGCGAGTTCGACCGGCACCAACTCTGCGACCATCACCCAGT_x000B_ACTCAAACCTCCAACTCACAAACCCAGCGCCCCGAACTCTCACATGTCTACCGACGACAACAAGGGCAAA_x000B_CAACCACTTCACCCGACACCTTCGGGCCCTAACGACACGACCCCGAAACCTATCCCTGCACCCACTCCCT_x000B_CAGCTACGCCCACAGCTACAGGCAAGGAAAACCAAGAGCCCATCGAAAAGCGTATCATACACGCTTTCCA_x000B_CGCTGAGGCAAAAACCCACAACAATGGGGTCTCTCCGCCTGCCTTTAACCCGAACAATATGAATGCTGTG_x000B_CCGCTGAACCTGCT…
CYVCV	CL58	MN547330	QKX95017		COAT PROTEIN	Iran	clementine mandarin	YRSYPFPHYCEFDRHQLCDHHPVLKPPTHKPSAPNSHMSTDDNKGKQPLHPTPSGPNDTTPKPIPAPTPS_x000B_ATPTATGKENQEPIEKRIIHAFHAEAKTHNNGVSPPAFNPNNMNAVPLNLLNLNLRYSPVTNSIANPKQT_x000B_EAIGKAWVRILNIDPANVFLYAIDLARACADAGSSPEADIIGANEDLNPVVERNALALVVRDFC	TTTACCGCAGCTATCCATTTCCACATTACTGCGAGTTCGACCGGCACCAACTCTGCGACCATCACCCAGT_x000B_ACTCAAACCTCCAACTCACAAACCCAGCGCCCCGAACTCTCACATGTCTACCGACGACAACAAGGGCAAA_x000B_CAACCACTTCACCCGACACCTTCGGGCCCTAACGACACGACCCCGAAACCTATCCCTGCACCCACTCCCT_x000B_CAGCTACGCCCACAGCTACAGGCAAGGAAAACCAAGAGCCCATCGAAAAGCGTATCATACACGCTTTCCA_x000B_CGCTGAAGCAAAAACCCACAACAATGGGGTCTCTCCGCCTGCCTTTAACCCGAACAATATGAATGCTGTG_x000B_CCGCTGAACCTGCT…
CYVCV	CL52	MN547329	QKX95016		COAT PROTEIN	Iran	clementine mandarin	YRSYPFPHYCEFDRHQLCDHHPVLKPPTHKPSAPNSHMSTDDNKGKQPLHPTPSGPNDTTPKPIPAPTPS_x000B_ATPTATGKENQEPIEKRIIHAFHAEAKTHNNGVSPPAFNPNNMNAVPLNLLNLNLRYSPVTNSIANPKQT_x000B_EAIGKAWVRILNIDPANVFLYAIDLARACADAGSSPEADIIGANEDLNPVVERNALALVVRDFC_x000B_	TTTACCGCAGCTATCCATTTCCACATTACTGCGAGTTCGACCGGCACCAACTCTGCGACCATCACCCAGT_x000B_ACTCAAACCTCCAACTCACAAACCCAGCGCCCCGAACTCTCACATGTCTACCGACGACAACAAGGGCAAA_x000B_CAACCACTTCACCCGACACCTTCGGGCCCTAACGACACGACCCCGAAACCTATCCCTGCACCCACTCCCT_x000B_CAGCTACGCCCACAGCTACAGGCAAGGAAAACCAAGAGCCCATCGAAAAGCGTATCATACACGCTTTCCA_x000B_CGCTGAAGCAAAAACCCACAACAATGGGGTCTCTCCGCCTGCCTTTAACCCGAACAATATGAATGCTGTG_x000B_CCGCTGAACCTGCT…
CYVCV	LIE2	MN547328	QKX95015		COAT PROTEIN	Iran	Persian lime	YRSYPFPHYCEFDRHQLCDHHPVLKPPTHKPSAPNSLMSTNDNKGKQPLHPTPPGPNDTTPKPIPVPTPS_x000B_ATPTAAGKENQEPIEKRITHAFHAEAKTHNNGVSPPAFNPNNMNAVPLNLLNLNLRYSPVTNSIANPKQT_x000B_EAIGKAWVRILNIDPANVFLYAIDLARACADAGSSPEADIIGANEDLNPVVERNALALVVRDFC_x000B_	TTTACCGCAGCTATCCATTTCCACACTACTGCGAGTTCGACCGGCACCAACTCTGCGACCATCATCCAGT_x000B_ACTCAAACCCCCAACTCACAAACCCAGTGCCCCGAACTCTCTCATGTCTACCAACGACAACAAGGGCAAA_x000B_CAACCACTTCACCCGACACCTCCGGGCCCTAACGACACGACCCCGAAACCTATCCCTGTACCCACTCCCT_x000B_CTGCCACACCCACAGCTGCAGGTAAGGAAAACCAAGAGCCCATCGAAAAGCGTATCACACACGCTTTCCA_x000B_CGCTGAAGCAAAAACCCACAACAATGGGGTCTCTCCACCTGCCTTTAACCCGAACAATATGAACGCTGTG_x000B_CCGCTGAACCTGCT…
ICRV	KPI	KT696525			coat protein_x000B_ICRSV-A		Kinnow	MSFDYTDPTFRNYPFPHYCDFDRHQHCDHDLQTNPPPTKLPSRKSKFMATSENKGKQPLHPPPTEDFPKP_x000B_PPPPSSTPATPTPPDQTKALEPIEKRIIHAFHAEPKTHTNGEAPPAFNPNNMNAVPLNLLNINLKYSPVT_x000B_NSIANPKQTEAIGKAWVRILQIDPANVFLYAIDLARACADAGSSPEADIIGANEDLNPVVERNALAGVVR_x000B_DFCPLRAFCAYYSRVVWNLMIKADQPPANWMKSGIDEGAKFAAFDFFHGVLSPASLYVPLERHPTAAERI_x000B_ANQAMFAVKIANAPGNGSELTMDHVAFTKGRITADSKPRPTPFNT_x000B_	ATGAGCTTTGACTACACAGATCCAACCTTCCGTAATTACCCCTTCCCGCACTACTGTGATTTCGACCGCC_x000B_ACCAACACTGCGACCACGACTTACAAACCAATCCACCTCCAACCAAGCTACCATCCCGAAAATCCAAATT_x000B_CATGGCCACCAGTGAGAACAAAGGCAAACAGCCGCTTCACCCACCTCCCACCGAAGACTTTCCAAAACCT_x000B_CCACCACCACCGTCGAGCACCCCGGCTACTCCTACACCGCCTGACCAGACGAAGGCTCTTGAACCCATTG_x000B_AGAAAAGAATCATCCACGCCTTCCACGCTGAACCCAAAACCCACACCAATGGAGAAGCCCCCCCAGCATT_x000B_CAATCCCAATAACA…
ICRV	Delhi	AY255006			coat protein_x000B_ICRSV-A	India: Delhi	mandarin	MSFDYTDPTFRNYPFPHYCDFDRHQPCDHDLRTNPPPTEPPSRKSKFMSTSENKGKQPLHPPPTEDFSKP_x000B_PPPPSSTPATPTPPDQTKALEPIEKRIIHAFHAEPKTHTNGEAPPAFNPNNMNAVPLNLLNINLKYSPVT_x000B_NSIANPKQTEAIGKAWVRILQIDPANVFLYAIDLARACADAGSSPEADIIGANEDLNPVVERNALAGVVR_x000B_DFCPLRAFCAYYSRVVWNLMIKADQPPANWMKSGIDEGAKFAAFDFFHGVLSPASLYVPLERHPTAAERI_x000B_ANQAMFAVKIANAPGNGSELTMDHVAFTKGRITADSKPHPTPFNT	ATGAGCTTTGACTACACAGATCCAACCTTCCGTAATTACCCCTTCCCGCACTACTGTGAT_x000B_TTCGACCGCCACCAACCCTGCGACCACGACCTACGAACCAATCCACCTCCAACCGAGCCA_x000B_CCATCCCGAAAATCCAAATTCATGTCTACCAGTGAGAACAAAGGCAAACAGCCTCTTCAC_x000B_CCGCCTCCCACCGAAGACTTTTCAAAACCTCCACCACCACCGTCGAGCACCCCGGCTACT_x000B_CCTACACCGCCCGACCAGACGAAGGCTCTTGAACCCATTGAGAAAAGAATCATCCACGCC_x000B_TTCCACGCTGAACCCAAAACCCACACCAATGGAGAAGCGCCCCCAGCATTCAATCCCAAT_x00…
CiYMV	SRGN	AY255006			coat protein		Kinnow	EPIEKRISQAFHAEPKTHNNGRASSEFNPNNMNAVPLSLLNLNLRYSPVTNSIANPKQTEAIGKAWCRIL_x000B_HIDPSKVFLYAVDLARACADAGTSPEADIIGANEDFDPVVERSALAGVVRDFCPLRAFCAYYSRVVWNLM_x000B_IKADQPPANWMKSGVDESAKFAAFDFFHGVLSPASLYVPLERHPTAAERIANQAMFAVKTANAPGNGSDL_x000B_AMDHVAFTKGRITQTSNQNKTPFAT	GAGCCCATTGAGAAAAGAATTTCACAAGCTTTCCACGCTGAGCCCAAGACCCACAACAATGGGAGGGCCT_x000B_CCTCCGAGTTTAACCCAAACAACATGAATGCAGTGCCCCTTAGCCTGCTCAACCTTAACCTCAGATACTC_x000B_TCCCGTAACTAACTCCATCGCCAACCCTAAACAGACTGAAGCTATTGGCAAAGCCTGGTGCCGCATCCTT_x000B_CACATCGACCCTAGCAAAGTATTCTTATACGCTGTGGACCTTGCCCGTGCCTGCGCTGACGCCGGAACCT_x000B_CACCTGAAGCAGACATCATTGGCGCCAACGAAGATTTCGATCCTGTGGTTGAGCGTAGTGCCCTCGCCGG_x000B_CGTCGTCAGAGACT…
ICRV	Abohar	AY255009			COAT PROTEIN_x000B_ICRSV-A	India	Kinnow mandarin	MSFDYTDPTFRNYPFPHYCDFDRHQHCDHDLRTNPPPTEPPSRKSKLMSTSENKGKQPLHPPPTEGFPKP_x000B_PPPPSSTPTTPTPPDQTKAPEPIEKRIIHAFHAEPKTHTNGEAPPAFNPNNMNAVPLNLLNINLKYSPVT_x000B_NSIANPKQTEAIGKAWVRILQIDPANVFLYAIDLARACADAGSSPEADIIGANEDLNPVVERNALAGVVR_x000B_DFCPLRAFCAYYSRVVWNLMIKADQPPANWMKSGIDEGAKFAAFDFFHGVLSPASLYVPLERHPTAAERI_x000B_ANQAMFAVKIANAPGNGSELTMDHVAFTKGRITADSKPRPTPFNT_x000B_	ATGAGCTTTGACTACACAGATCCAACCTTCCGTAATTACCCCTTCCCGCACTATTGTGAT_x000B_TTCGACCGCCACCAACACTGCGATCACGACCTACGAACCAATCCACCTCCAACCGAGCCA_x000B_CCATCCCGAAAATCCAAACTCATGTCTACCAGTGAGAACAAAGGCAAACAGCCGCTTCAC_x000B_CCGCCTCCCACCGAAGGCTTTCCAAAACCTCCACCACCACCGTCGAGCACTCCGACTACT_x000B_CCTACACCGCCCGACCAGACGAAGGCTCCTGAACCCATTGAGAAAAGAATCATCCACGCC_x000B_TTCCACGCTGAACCTAAAACCCACACCAATGGAGAAGCCCCCCCGGCATTCAATCCCAAT_x00…
